# Supplementary material
Source: PubMed Central journal article supplement (PMC5496003)
Supplement: SC-006-C4SC03516J-s001.pdf [file SC-006-C4SC03516J-s001.pdf]

## Supporting Information:

# Chemiluminescent Probes for Imaging H<sub>2</sub>S in Living Animals

J. Cao,<sup>a,b</sup> R. Lopez,<sup>c</sup> J. M. Thacker,<sup>a</sup> J. Y. Moon,<sup>a</sup> C. Jiang,<sup>d</sup> S. N. S. Morris,<sup>e</sup> J. H. Bauer,<sup>b,e</sup> P. Tao, R. P. Mason, and A. R. Lippert\*<sup>a,b</sup>

<sup>a</sup> Department of Chemistry, Southern Methodist University, Dallas, TX 75275-0314, USA.

<sup>b</sup> Center for Drug Discovery, Design, and Delivery (CD4), Southern Methodist University, Dallas, TX 75275-0314, USA

<sup>c</sup> Laboratory of Prognostic Radiology, Pre-clinical Imaging Section, Department of Radiology, UT Southwestern Medical Center, Dallas, TX 75390-9058, USA

<sup>d</sup> Hockaday School, Dallas, TX 75229, USA

<sup>e</sup> Department of Biological Sciences, Southern Methodist University, Dallas, TX 75275-0314, USA

| <b>Table of contents</b>                          | <b>Pages</b> |
|---------------------------------------------------|--------------|
| 1. Synthetic procedures                           | S2           |
| 2. Chemiluminescent response                      | S10          |
| 3. Selectivity tests                              | S11          |
| 4. Computational results                          | S13          |
| 5. Cellular experiments                           | S17          |
| 6. Imaging experiments                            | S18          |
| 7. <sup>1</sup> H and <sup>13</sup> C NMR spectra | S20          |
| 8. References                                     | S51          |

## 1. Synthetic procedures

**General materials and methods.** All reactions were performed in dried glassware under an atmosphere of dry N<sub>2</sub>. Silica gel P60 (SiliCycle) was used for column chromatography and SiliCycle 60 F254 silica gel (precoated sheets, 0.25 mm thick) was used for analytical thin layer chromatography. Plates were visualized by fluorescence quenching under UV light or by staining with iodine. Other reagents were purchased from Sigma-Aldrich (St. Louis, MO), Alfa Aesar (Ward Hill, MA), EMD Millipore (Billerica, MA), Oakwood Chemical (West Columbia, SC), and Cayman Chemical (Ann Arbor, MI) and used without further purification. <sup>1</sup>H NMR and <sup>13</sup>C NMR spectra for characterization of new compounds and monitoring reactions were collected in CDCl<sub>3</sub> (Cambridge Isotope Laboratories, Cambridge, MA) on a JEOL 500 MHz spectrometer in the Department of Chemistry at Southern Methodist University. All chemical shifts are reported in the standard notation of parts per million using the peak of residual proton signals of the deuterated solvent as an internal reference. Coupling constant units are in Hertz (Hz) Splitting patterns are indicated as follows: br, broad; s, singlet; d, doublet; t, triplet; q, quartet; m, multiplet; dd, doublet of doublets; dt, doublet of triplets. High resolution mass spectroscopy was performed on a Shimadzu IT-TOF (ESI source) and low resolution mass spectroscopy was performed on a Shimadzu LCMS-8050 Triple Quadrupole LCMS (ESI source) or a Shimadzu Matrix Assisted Laser Desorption/Ionization MS (MALDI) at the Shimadzu Center for Advanced Analytical Chemistry at the University of Texas, Arlington.

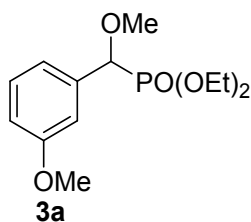

**Diethyl (methoxy (3-methoxyphenyl) methyl) phosphonate (3a).** 3-Methoxybenzaldehyde (1.83 mL, 15.0 mmol, 1.0 equiv), trimethyl orthoformate (1.65 mL, 15.0 mmol, 1.0 equiv) and *p*-toluenesulfonic acid (258 mg, 1.50 mmol, 0.10 equiv) were added to a dry round-bottom flask and flushed with N<sub>2</sub>. The reaction contents were dissolved in 6.0 mL of MeOH. The reaction proceeded for 24 h at rt, and was then neutralized with NEt<sub>3</sub>. After neutralization, the crude mixture was poured into 30 mL saturated aq NaHCO<sub>3</sub>. The layers were separated and the aqueous layer was washed with an additional 2 x 40 mL EtOAc. The combined organic layers were collected and dried over Na<sub>2</sub>SO<sub>4</sub>, filtered, and concentrated to yield the crude acetal **2a** (2.52 g). Compound **2a** (1.94 g, 10.7 mmol, 1.0 equiv) was dissolved in 10.0 mL CH<sub>2</sub>Cl<sub>2</sub>, and triethyl phosphite (1.89 mL, 11.0 mmol, 1.03 equiv) and boron trifluoride etherate (1.38 mL, 11.0 mmol, 1.03 equiv) were added dropwise at 0 °C. Once all the reagents were added, the reaction was heated to 30 °C and allowed to react for 1 h under N<sub>2</sub> atmosphere. The reaction was quenched with 20 mL saturated aq NaHCO<sub>3</sub>, extracted with 2 x 30 mL EtOAc, and evaporated under reduced pressure. Purification by column chromatography (40%–100% EtOAc/hexanes)

afforded **3a** as a pale yellow oil (2.332 g, 89%). <sup>1</sup>H NMR (500 MHz, CDCl<sub>3</sub>) δ 7.26 (t, 1H, *J* = 8.0 Hz), 6.97–7.02 (m, 2H), 6.85 (d, 1H, *J* = 8.0 Hz), 4.47 (d, 1H, *J* = 15.5 Hz), 3.90–4.13 (m, 4H), 3.81 (s, 3H), 3.38 (s, 3H), 1.20–1.29 (m, 6H); <sup>13</sup>C NMR (125 MHz, CDCl<sub>3</sub>) δ 159.63, 135.94, 129.31, 120.43, 114.31, 112.96, 80.52, 79.71, 63.10 (d, *J* = 7.2 Hz), 62.93 (d, *J* = 7.2 Hz), 58.76 (d, *J* = 14.3 Hz), 55.22, 16.40 (d, *J* = 5.9 Hz), 16.33 (d, *J* = 5.9 Hz); HRMS calcd for C<sub>13</sub>H<sub>21</sub>O<sub>5</sub>P (M+Na<sup>+</sup>) 311.1019, found 311.1013.

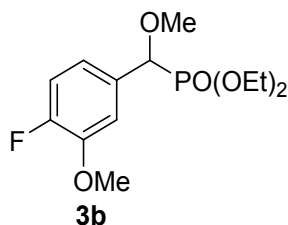

**Diethyl ((4-fluoro-3-methoxyphenyl) (methoxy) methyl) phosphonate (3b).** 4-Fluoro-3-methoxybenzaldehyde (1.0 g, 6.5 mmol, 1.0 equiv), trimethyl orthoformate (0.71 mL, 6.5 mmol, 1.0 equiv) and *p*-toluenesulfonic acid (111.9 mg 0.6498 mmol, 0.10 equiv) were dissolved in 4.0 mL of MeOH. The reaction proceeded for 24 h at rt, and was then neutralized with NEt<sub>3</sub>. After neutralization, the crude mixture was poured into 30 mL saturated aq NaHCO<sub>3</sub>. The layers were separated and the aqueous layer was washed with an additional 2 x 40 mL EtOAc, the combined organic layers were collected and dried over Na<sub>2</sub>SO<sub>4</sub>, filtered, and concentrated to yield crude acetal **2b** (1.25 g). Compound **2b** (1.25 g, 6.25 mmol, 1.0 equiv) was dissolved in 6.0 mL CH<sub>2</sub>Cl<sub>2</sub>, and triethyl phosphite (1.10 mL, 6.44 mmol, 1.0 equiv) and boron trifluoride etherate (0.80 mL, 6.4 mmol, 1.0 equiv) were added dropwise at 0 °C. Once all the reagents were added, the reaction was heated to 30 °C and allowed to react for 1 h under N<sub>2</sub> atmosphere. The reaction was quenched with 20 mL saturated aq NaHCO<sub>3</sub>, extracted with 2 x 30 mL EtOAc, and evaporated under reduced pressure. Purification by column chromatography (40%–100% EtOAc/hexanes) afforded **3b** as a yellow oil (1.247 g, 66%). <sup>1</sup>H NMR (500 MHz, CDCl<sub>3</sub>) δ 6.92 (dt, 1H, *J* = 8.6, 2.3 Hz), 6.83 (dd, 1H, *J* = 10.9, 2.3 Hz), 6.71–6.75 (m, 1H), 4.26 (d, 1H, *J* = 15.5 Hz), 3.80–3.91 (m, 4H), 3.68 (s, 3H), 3.17 (s, 3H), 0.95–1.10 (m, 6H); <sup>13</sup>C NMR (125 MHz, CDCl<sub>3</sub>) 152.58, 150.65, 147.02 (d, *J* = 10.7 Hz), 130.20, 119.90 (d, *J* = 7.2 Hz), 114.95 (d, *J* = 19.1 Hz), 112.11, 79.84, 78.49, 62.41 (d, *J* = 7.2 Hz), 62.18 (d, *J* = 7.2 Hz), 58.32 (d, *J* = 14.3 Hz), 55.36, 15.70 (d, *J* = 5.9 Hz), 15.64 (d, *J* = 5.9 Hz); HRMS calcd for C<sub>13</sub>H<sub>20</sub>FO<sub>5</sub>P (M+Na<sup>+</sup>) 329.0925, found 329.0931.

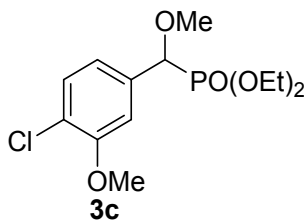

**Diethyl ((4-chloro-3-methoxyphenyl) (methoxy) methyl) phosphonate (3c).** 4-Chloro-3-methoxybenzaldehyde (400 mg, 2.34 mmol, 1.0 equiv), trimethyl orthoformate (256  $\mu$ L, 2.34 mmol, 1.0 equiv) and *p*-toluenesulfonic acid (40.4 mg 0.234 mmol, 0.10 equiv) were added to a dry flask and flushed with N<sub>2</sub>. The reaction contents were dissolved in 1.5 mL of MeOH. The reaction proceeded for 24 h at rt, and was then neutralized with NEt<sub>3</sub>. After neutralization, the crude mixture was poured into 20 mL saturated aq NaHCO<sub>3</sub>. The layers were separated and the aqueous layer was washed with an additional 2 x 30 mL EtOAc, the combined organic layers were collected and dried over Na<sub>2</sub>SO<sub>4</sub>, filtered, and concentrated to yield crude acetal **2c** (474 mg). Compound **2c** (474 mg, 2.19 mmol, 1.0 equiv) was dissolved in 2.0 mL CH<sub>2</sub>Cl<sub>2</sub>, and triethyl phosphite (0.39 mg, 2.3 mmol, 1.0 equiv) and boron trifluoride etherate (0.28 mL, 2.3 mmol, 1.0 equiv) were added dropwise at 0 °C. Once reagents were added, the reaction was heated to 30 °C and allowed to react for 1 h under N<sub>2</sub> atmosphere. The reaction was quenched with 20 mL saturated aq NaHCO<sub>3</sub>, extracted with 2 x 30 mL EtOAc, and evaporated under reduced pressure. Purification by column chromatography (40%–100% EtOAc/hexanes) afforded **3c** as a pale yellow oil (598 mg, 83%). <sup>1</sup>H NMR (500 MHz, CDCl<sub>3</sub>)  $\delta$  7.23 (d, 1H, *J* = 8.1 Hz), 6.98 (t, 1H, *J* = 2.0 Hz), 6.83 (dt, 1H, *J* = 6.3, 2.0 Hz), 4.37 (d, 1H, *J* = 16.1 Hz), 3.86–4.00 (m, 4H), 3.81 (s, 3H), 3.29 (s, 3H), 1.11–1.26 (m, 6H); <sup>13</sup>C NMR (125 MHz, CDCl<sub>3</sub>)  $\delta$  154.82, 134.40, 129.72, 122.29, 120.74, 111.12, 80.44, 79.43, 63.05 (d, *J* = 10.7 Hz), 62.81 (d, *J* = 10.7 Hz), 58.65 (d, *J* = 14.3 Hz), 55.97, 16.26 (d, *J* = 5.9 Hz), 16.18 (d, *J* = 5.9 Hz); HRMS calcd for C<sub>13</sub>H<sub>20</sub>ClO<sub>3</sub>P (M+Na<sup>+</sup>) 345.0629, found 345.0624.

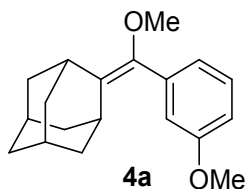

**(1r, 3r, 5R, 7S) - 2 - (methoxy (3-methoxyphenyl) methylene) adamantane (4a).** Compound **3a** (1.27 g, 4.47 mmol, 1.0 equiv) and 2-adamantanone (939 mg, 6.25 mmol, 1.4 equiv) were dissolved separately in 15 mL and 8 mL anhydrous THF under N<sub>2</sub> atmosphere and cooled to –78 °C by mixing dry ice with acetone. *n*-Butyl lithium (3.91 mL, 6.25 mmol, 1.4 equiv) was then added dropwise to the solution of compound **3a** at –78 °C to form the phosphonate carbanion. After 5 min, the 2-adamantanone solution was slowly added. The reaction was slowly warmed to rt and heated to 35 °C for 2 h and then refluxed for 1 h. After the reaction mixture was cooled to rt, it was quenched with 20 mL saturated aq NH<sub>4</sub>Cl. The mixture was then extracted with 2 x 30 mL EtOAc and evaporated under reduced pressure. Purification by column chromatography (1:20 EtOAc/hexanes) delivered **4a** as a colorless oil (1.2482 g, 85%). <sup>1</sup>H NMR (500 MHz, CDCl<sub>3</sub>)  $\delta$  7.25 (t, 1H, *J* = 8.0 Hz), 6.89–6.92 (m, 2H), 6.83 (dd, 1H, *J* = 8.0, 3.0 Hz), 3.81 (s, 3H), 3.31 (s, 3H), 3.27 (s, 1H), 2.66 (s, 1H), 1.71–1.98 (m, 12H); <sup>13</sup>C NMR (125 MHz, CDCl<sub>3</sub>)  $\delta$  159.45, 143.45, 136.95, 131.74, 128.96, 122.05, 114.74, 113.07, 57.82, 55.27, 39.30, 39.16, 37.29, 32.34, 30.29, 28.42; HRMS calcd for C<sub>19</sub>H<sub>24</sub>O<sub>2</sub> (M+H<sup>+</sup>) 285.1849, found 285.1853.



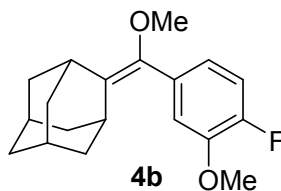

**(1*r*, 3*r*, 5*R*, 7*S*) - 2 - ((4-fluoro-3-methoxyphenyl) (methoxy) methylene) adamantane (4b).**

Compound **3b** (1.17 g, 3.87 mmol, 1.0 equiv) and 2-adamantanone (730 mg, 4.86 mmol, 1.3 equiv) were dissolved separately in 13 mL and 6 mL anhydrous THF under N<sub>2</sub> atmosphere and cooled to -78 °C by mixing dry ice and acetone. *n*-Butyl lithium (3.0 mL, 4.86 mmol, 1.3 equiv) was then added dropwise to the solution of compound **3b** at -78 °C to form the phosphonate carbanion. After 5 min, the 2-adamantanone solution was slowly added. The reaction was slowly warmed to rt and heated to 35 °C for 2 h and then refluxed for 1 h. After the reaction mixture was cooled to rt, the reaction mixture was quenched with 20 mL saturated aq NH<sub>4</sub>Cl. The mixture was then extracted with 2 x 30 mL EtOAc and evaporated under reduced pressure. Purification by column chromatography (1:20 EtOAc/hexanes) delivered **4b** as a colorless oil (1.12 g, 85%). <sup>1</sup>H NMR (500 MHz, CDCl<sub>3</sub>) δ 6.99–7.03 (m, 1H), 6.94 (dd, 1H, *J* = 8.0, 2.0 Hz), 6.79–6.82 (m, 1H), 3.87 (s, 3H), 3.29 (s, 3H), 3.23 (s, 1H), 2.60 (s, 1H), 1.58–1.97 (m, 12H); <sup>13</sup>C NMR (125 MHz, CDCl<sub>3</sub>) δ 152.58, 150.62, 147.18 (d, *J* = 10.7 Hz), 142.81, 131.93, 122.12 (d, *J* = 7.2 Hz), 115.40 (d, *J* = 19.1 Hz), 114.22, 57.79, 56.26, 39.24, 39.11, 37.23, 32.38, 30.30, 28.36; HRMS calcd for C<sub>19</sub>H<sub>23</sub>ClO<sub>2</sub> (M+H<sup>+</sup>) 303.1755, found 303.1762.

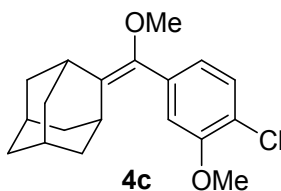

**(1*r*, 3*r*, 5*R*, 7*S*) - 2 - ((4-chloro-3-methoxyphenyl) (methoxy) methylene) adamantane (4c).**

Compound **3c** (365 mg, 1.13 mmol, 1.0 equiv) and 2-adamantanone (215 mg, 1.43 mmol, 1.3 equiv) were dissolved separately in 4 mL and 2 mL anhydrous THF under N<sub>2</sub> atmosphere and cooled to -78 °C by mixing dry ice and acetone. *n*-Butyl lithium (0.89 mL, 1.4 mmol, 1.3 equiv) was then added dropwise to the solution of compound **3c** at -78 °C to form the phosphonate carbanion. After 5 min reaction, the 2-adamantanone solution was slowly added. The reaction was slowly warmed to rt and heated to 35 °C for 2 h and then refluxed for 1 h. After the reaction mixture was cooled to rt, it was quenched with 10 mL saturated aq NH<sub>4</sub>Cl. The mixture was then extracted with 2 x 20 mL EtOAc and evaporated under reduced pressure. Purification by column chromatography (1:20 EtOAc/hexanes) delivered **4c** as a colorless oil (294 mg, 78%). <sup>1</sup>H NMR (500 MHz, CDCl<sub>3</sub>) δ 7.30 (d, 1H, *J* = 8.0 Hz), 6.91 (d, 1H, *J* = 1.8 Hz), 6.83 (dd, 1H, *J* = 8.0, 1.8 Hz), 3.89 (s, 3H), 3.30 (s, 3H), 3.24 (s, 1H), 2.62 (s, 1H), 1.58–1.97 (m, 12H); <sup>13</sup>C NMR (125 MHz, CDCl<sub>3</sub>) δ 154.84, 142.77, 135.44, 132.56, 129.62, 122.54, 121.41, 112.82, 57.90, 56.16,

39.24, 39.11, 37.21, 32.43, 30.35, 28.34; HRMS calcd for C<sub>19</sub>H<sub>23</sub>ClO<sub>2</sub> (M+H<sup>+</sup>) 319.1459, found 319.1461.

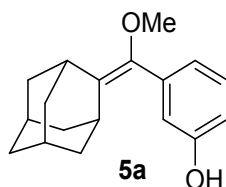

**3-(((1r, 3r, 5R, 7S)-adamantan-2-ylidene) (methoxy) methyl) phenol (5a).** Sodium ethane thiolate (769 g, 9.14 mmol, 2.5 equiv) and cesium carbonate (2.98 g, 9.14 mmol, 2.5 equiv) were added to a dry round bottle flask containing compound **4a** (1.04 g, 3.66 mmol, 1.0 equiv) dissolved in 30 mL anhydrous DMF under N<sub>2</sub> atmosphere. After refluxing overnight, the reaction mixture was partitioned between EtOAc and NH<sub>4</sub>Cl, dried over Na<sub>2</sub>SO<sub>4</sub> and evaporated under high vacuum to remove residual DMF. Purification by column chromatography (1:15–1:10 EtOAc/hexanes) afforded **5a** as a white solid (620.9 mg, 63%). <sup>1</sup>H NMR (500 MHz, CDCl<sub>3</sub>) δ 7.17–7.21 (m, 1H), 6.99 (s, 1H), 6.80–6.94 (m, 3H), 3.35 (s, 3H), 3.23 (s, 1H), 2.67 (s, 1H), 1.63–1.98 (m, 12H); <sup>13</sup>C NMR (125 MHz, CDCl<sub>3</sub>) δ 155.92, 142.62, 136.48, 132.63, 129.11, 121.70, 115.86, 114.71, 57.73, 39.06, 38.93, 37.03, 32.20, 30.26, 28.16. LRMS (MALDI) calcd for C<sub>18</sub>H<sub>22</sub>O<sub>4</sub> (M<sup>+</sup>) 270.1620, found 270.1815.

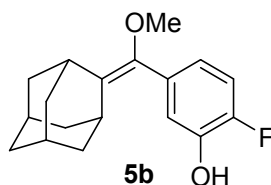

**5-(((1r, 3r, 5R, 7S)-adamantan-2-ylidene) (methoxy) methyl)-2-fluorophenol (5b).** Sodium ethane thiolate (215 mg, 2.56 mmol, 1.5 equiv) and cesium carbonate (834 g, 2.56 mmol, 1.5 equiv) were added to a dry round bottle flask filled with N<sub>2</sub> containing compound **4b** (516 mg, 1.71 mmol, 1.0 equiv) dissolved in 10 mL of anhydrous DMF. After refluxing overnight, the reaction mixture was partitioned between EtOAc and NH<sub>4</sub>Cl, dried over Na<sub>2</sub>SO<sub>4</sub> and evaporated under high vacuum to remove residual DMF. Purification by column chromatography (1:15 EtOAc/hexanes) afforded **5b** as a white solid (323 mg, 62%). <sup>1</sup>H NMR (500 MHz, CDCl<sub>3</sub>) δ 7.00–7.05 (m, 1H), 6.95–6.98 (m, 1H), 6.78–6.82 (m, 1H), 6.74 (m, 1H), 5.47 (s, 1H), 3.30 (s, 3H), 3.23 (s, 1H), 2.59 (s, 1H), 1.66–1.96 (m, 12H); <sup>13</sup>C NMR (125 MHz, CDCl<sub>3</sub>) δ 156.56, 142.77, 138.58, 135.43, 132.64, 121.73, 117.53, 115.30, 57.89, 39.16, 39.02, 37.10, 32.18, 30.78, 28.23; HRMS calcd for C<sub>18</sub>H<sub>21</sub>FO<sub>2</sub> (M–H<sup>+</sup>) 287.1453, found 287.1456.

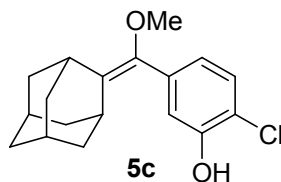

**5-(((1*r*, 3*r*, 5*R*, 7*S*)-adamantan-2-ylidene) (methoxy) methyl)-2-chlorophenol (5c).** Sodium ethane thiolate (204 mg, 2.43 mmol, 2.5 equiv) and cesium carbonate (791 mg, 2.43 mmol, 2.5 equiv) were added to a dry round bottle flask containing compound **4c** (309 mg, 0.971 mmol, 1.0 equiv) dissolved in 9.0 mL anhydrous DMF under N<sub>2</sub> atmosphere. After refluxing overnight, the reaction mixture was partitioned between EtOAc and NH<sub>4</sub>Cl, dried over Na<sub>2</sub>SO<sub>4</sub> and evaporated under high vacuum to remove residual DMF. Purification by column chromatography (1:12 EtOAc/hexanes) afforded **5c** as a white solid (232 mg, 79%). <sup>1</sup>H NMR (500 MHz, CDCl<sub>3</sub>) δ 7.28 (d, 1H, *J* = 8.0 Hz), 6.98 (d, 1H, *J* = 3.5 Hz), 6.83 (dd, 1H, *J* = 8.0, 3.5 Hz) 5.95 (s, 1H), 3.30 (s, 3H), 3.22 (s, 1H), 2.62 (s, 1H), 1.55–1.96 (m, 12H); <sup>13</sup>C NMR (125 MHz, CDCl<sub>3</sub>) δ 151.12, 142.18, 135.88, 132.79, 128.57, 122.38, 118.84, 116.97, 57.80, 39.08, 38.94, 37.04, 32.22, 30.21, 28.17; HRMS calcd for C<sub>18</sub>H<sub>21</sub>ClO<sub>2</sub> (M–H<sup>+</sup>) 303.1157, found 303.1150.

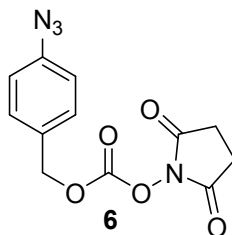

**4-azidobenzyl (2,5-dioxopyrrolidin-1-yl) carbonate (6).** *N,N'*-Disuccinimidyl carbonate (830 mg, 3.25 mmol, 1.5 equiv) was added to a solution of 4-azidobenzyl alcohol (323 mg, 2.16 mmol, 1.0 equiv) in 5.0 mL CH<sub>2</sub>Cl<sub>2</sub>, followed directly by the addition of NEt<sub>3</sub> (0.91 mL, 6.5 mmol, 3.0 equiv). The reaction was stirred for 4 h at rt. The reaction was quenched with 20 mL 1 M NaHCO<sub>3</sub>, extracted with 2 x 30 mL EtOAc, washed with 10 mL brine, dried over Na<sub>2</sub>SO<sub>4</sub>, filtered, and concentrated to yield **6** (628.7 mg) as an orange oil and used without further purification. <sup>1</sup>H NMR (500 MHz, CDCl<sub>3</sub>) δ 7.38 (d, 2H, *J* = 8.6 Hz), 7.03 (d, 2H, *J* = 8.6 Hz), 5.29 (s, 2H), 2.82 (s, 4H).

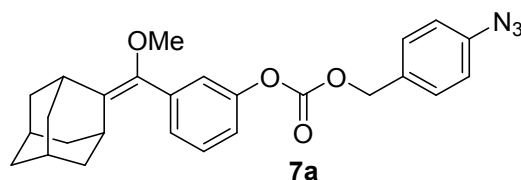

**3-(((1*r*, 3*r*, 5*R*, 7*S*)-adamantan-2-ylidene) (methoxy) methyl)phenyl (4-azidobenzyl) carbonate (7a).** Compound **5a** (77 mg, 0.29 mmol, 1.0 equiv) was dissolved in 1.5 mL 4:1 THF:CH<sub>2</sub>Cl<sub>2</sub> in a dry flask under N<sub>2</sub> atmosphere. Compound **6** (126 mg, 0.44 mmol, 1.5 equiv)

was added as a solution in 1.5 mL CH<sub>2</sub>Cl<sub>2</sub>. DMAP (53 mg, 0.44 mmol, 1.5 equiv) and NEt<sub>3</sub> (124 μL, 0.899 mmol, 3.1 equiv) were then added in succession. After 14 h of stirring at rt, the mixture was poured into a separatory funnel containing 20 mL CH<sub>2</sub>Cl<sub>2</sub> and 15 mL DI-H<sub>2</sub>O and extracted with 3 x 20 mL CH<sub>2</sub>Cl<sub>2</sub>. The organic layer was washed with 10 mL brine, dried over Na<sub>2</sub>SO<sub>4</sub>, filtered, and concentrated. Purification by silica column chromatography (1:15 EtOAc/hexanes) afforded **7a** as a clear oil (84 mg, 62%). <sup>1</sup>H NMR (500 MHz, CDCl<sub>3</sub>) δ 7.43 (d, 2H, *J* = 8.6 Hz), 7.34 (t, 1H, *J* = 7.5 Hz), 7.18–7.20 (m, 1H), 7.06–7.12 (m, 2H), 7.04 (d, 2H, *J* = 8.6 Hz), 5.23 (s, 2H), 3.29 (s, 3H), 3.24 (s, 1H), 2.64 (s, 1H), 1.65–2.10 (m, 12H); <sup>13</sup>C NMR (125 MHz, CDCl<sub>3</sub>) δ 153.51, 150.84, 142.52, 140.61, 137.13, 132.78, 131.36, 130.30, 128.94, 126.97, 121.68, 119.82, 119.23, 69.66, 57.90, 39.11, 38.99, 37.07, 32.09, 30.22, 28.19; HRMS calcd for C<sub>26</sub>H<sub>27</sub>N<sub>3</sub>O<sub>4</sub> (M+H<sup>+</sup>) 446.2074, found 446.2073.

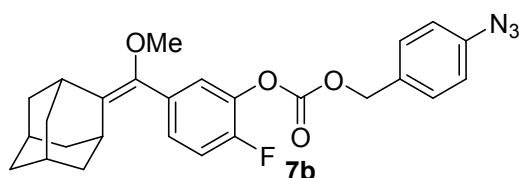

**5-(((1*r*, 3*r*, 5*R*, 7*S*)-adamantan-2-ylidene) (methoxy) methyl)-2-fluorophenyl (4-azidobenzyl) carbonate (**7b**).** Compound **5b** (123 mg, 0.427 mmol, 1.0 equiv) was dissolved in 3.5 mL 4:1 THF:CH<sub>2</sub>Cl<sub>2</sub> in a dry flask under N<sub>2</sub> atmosphere. Compound **6** (186 mg, 0.641 mmol, 1.5 equiv) was added as a solution in 3.3 mL CH<sub>2</sub>Cl<sub>2</sub>, followed directly by the addition of DMAP (78.3 mg, 0.641 mmol, 1.5 equiv) and NEt<sub>3</sub> (185 μL, 1.32 mmol, 3.1 equiv). After 14 h of stirring at rt, the mixture was poured into a separatory funnel containing 30 mL CH<sub>2</sub>Cl<sub>2</sub> and 20 mL DI-H<sub>2</sub>O and extracted with 3 x 30 mL CH<sub>2</sub>Cl<sub>2</sub>. The organic layer was washed with 10 mL brine, dried over Na<sub>2</sub>SO<sub>4</sub>, filtered, and concentrated. Purification by silica column chromatography (1:15 EtOAc/hexanes) afforded **7b** as a clear oil (125 mg, 63%). <sup>1</sup>H NMR (500 MHz, CDCl<sub>3</sub>) δ 7.43 (d, 2H, *J* = 8.0 Hz), 7.10–7.20 (m, 3H), 7.05 (d, 2H, *J* = 8.0 Hz), 5.25 (s, 2H), 3.28 (s, 3H), 3.22 (s, 1H), 2.60 (s, 1H), 1.53–2.10 (m, 12H); <sup>13</sup>C NMR (125 MHz, CDCl<sub>3</sub>) δ 153.98, 152.66, 141.64, 140.69, 132.98, 132.29, 131.12, 130.25, 128.16, 123.89, 119.25, 116.38, 116.24, 70.18, 57.90, 39.08, 38.96, 37.02, 32.11, 30.24, 28.14. LRMS (MALDI) calcd for C<sub>26</sub>H<sub>26</sub>ClN<sub>3</sub>O<sub>4</sub> (M<sup>+</sup>) 463.1907, found 463.3052.

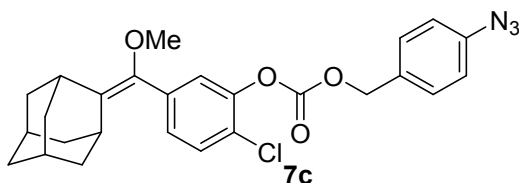

**5-(((1*r*, 3*r*, 5*R*, 7*S*)-adamantan-2-ylidene) (methoxy) methyl)-2-chlorophenyl (4-azidobenzyl) carbonate (**7c**).** Compound **5c** (66.6 mg, 0.218 mmol, 1.0 equiv) was dissolved in 1.5 mL 4:1 THF: CH<sub>2</sub>Cl<sub>2</sub> in a dry flask under N<sub>2</sub> atmosphere. Compound **6** (76.6 mg, 0.262 mmol, 1.2

equiv) was added as a solution in 1.2 mL CH<sub>2</sub>Cl<sub>2</sub>. DMAP (40.0 mg, 0.327 mmol, 1.5 equiv) and NEt<sub>3</sub> (95 μL, 0.68 mmol, 3.1 equiv) were then added in succession. After 14 h of stirring at rt, the mixture was poured into a separatory funnel containing 20 mL CH<sub>2</sub>Cl<sub>2</sub> and 10 mL DI-H<sub>2</sub>O and extracted with 3 x 20 mL CH<sub>2</sub>Cl<sub>2</sub>. The organic layer was washed with 10 mL brine, dried over Na<sub>2</sub>SO<sub>4</sub>, filtered, and concentrated. Purification by silica column chromatography (1:15 EtOAc/hexanes) afforded **7c** as a clear oil (53 mg, 51%). <sup>1</sup>H NMR (500 MHz, CDCl<sub>3</sub>) δ 7.43 (d, 2H, *J* = 8.6 Hz), 7.39 (d, 1H, *J* = 8.1 Hz), 7.15–7.17 (m, 2H), 7.05 (d, 2H, *J* = 8.6 Hz), 5.26 (s, 2H), 3.30 (s, 3H), 3.22 (s, 1H), 2.63 (s, 1H), 1.56–2.00 (m, 12H); <sup>13</sup>C NMR (125 MHz, CDCl<sub>3</sub>) δ 152.53, 146.75, 141.60, 140.66, 135.76, 133.75, 131.22, 130.24, 129.86, 128.13, 125.37, 123.76, 119.23, 70.12, 58.04, 39.09, 38.07, 37.00, 32.15, 30.31, 28.14. LRMS (MALDI) calcd for C<sub>26</sub>H<sub>26</sub>ClN<sub>3</sub>O<sub>4</sub> (M<sup>+</sup>) 479.1612, found 479.2970.

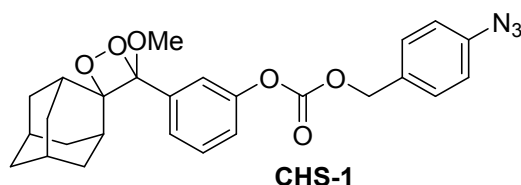

**4-azidobenzyl (3-((1r, 3r, 5r, 7r) - 4' - methoxyspiro [adamantane - 2, 3' - [1,2] dioxetan] - 4' -yl) phenyl) carbonate (CHS-1).** Compound **7a** (75 mg, 0.17 mmol, 1.0 equiv) and Rose bengal (8.5 mg, 0.0087 mmol, 0.051 equiv) were added into a dry flask and dissolved in 5 mL THF. Oxygen was bubbled through the reaction mixture, while irradiating with a 120 W light bulb (Home Depot, Dallas, TX) at 0 °C. After 3.5 h of reaction, TLC showed no starting material left and the mixture was then concentrated under vacuum at 0 °C and the residue was purified by the silica column chromatography (1:15 EtOAc/hexanes) to deliver **CHS-1** as a white solid (56.4 mg, 70 %). <sup>1</sup>H NMR (500 MHz, CDCl<sub>3</sub>) δ 7.42–7.92 (br m, 3H), 7.42–7.44 (m, 2H), 7.23 (dd, 1H, *J* = 9.2, 2.3 Hz), 7.05 (d, 2H, *J* = 8.6 Hz), 5.23 (s, 2H), 3.21 (s, 3H), 3.02 (s, 1H), 2.12 (s, 1H), 1.20–1.90 (m, 12H); <sup>13</sup>C NMR (125 MHz, CDCl<sub>3</sub>) δ 153.43, 151.08, 140.82, 136.73, 131.34, 130.42, 129.33, 122.10, 119.39, 111.58, 95.52, 69.94, 50.13, 36.44, 34.74, 32.94, 32.82, 32.35, 31.77, 31.50 25.93, 25.81.

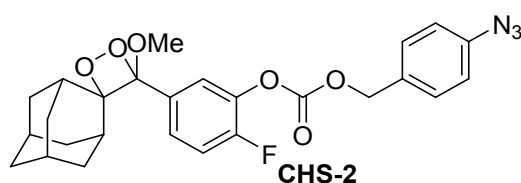

**4-azidobenzyl (2-fluoro-5-((1r, 3r, 5r, 7r) - 4' - methoxyspiro [adamantane - 2, 3' - [1,2] dioxetan] - 4' -yl)phenyl) carbonate (CHS-2).** Compound **7b** (47.6 mg, 0.103 mmol, 1 equiv) and Rose bengal (7 mg, 0.007 mmol, 0.07 equiv) were added into a dry flask and dissolved in 5.0 mL THF. Oxygen was bubbled through the reaction mixture, while irradiating with a 120 W light bulb (Home Depot, Dallas, TX) at 0–5 °C. After 6 h of reaction, the mixture was

concentrated under vacuum at 0 °C. Purification by silica column chromatography (1:15 EtOAc/hexanes) provided **CHS-2** as a white solid (32.5 mg, 66%). <sup>1</sup>H NMR (500 MHz, CDCl<sub>3</sub>) δ 7.40–7.91 (br m, 2H), 7.41–7.44 (m, 2H), 7.20–7.24 (m, 1H), 7.04–7.06 (d, 2H, *J* = 8.6 Hz), 5.25 (s, 2H), 3.21 (s, 3H), 3.01 (s, 1H), 2.07 (s, 1H), 0.90–2.00 (m, 12H); <sup>13</sup>C NMR (125 MHz, CDCl<sub>3</sub>) δ 155.47, 153.46, 152.48, 140.79, 138.33, 131.61, 130.98, 130.26, 119.29, 116.82, 116.67, 111.06, 95.37, 70.34, 50.00, 39.25, 36.26, 34.78, 33.13, 32.87, 32.19, 31.67, 31.50, 25.93, 25.78.

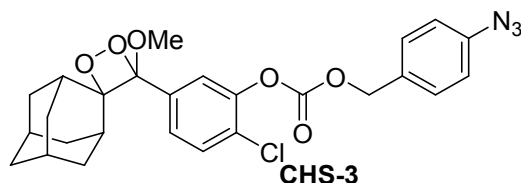

**4-azidobenzyl (2-chloro-5-((1*r*, 3*r*, 5*r*, 7*r*) - 4' -methoxyspiro [adamantane - 2, 3' - [1,2] dioxetan] - 4' -yl)phenyl) carbonate (CHS-3).** Compound **7c** (37.3 mg, 0.0777 mmol, 1 equiv) and Rose bengal (6 mg, 0.006 mmol, 0.08 equiv) were added into a dry flask and dissolved in 4.0 mL THF. Oxygen was bubbled through the reaction mixture, while irradiating with a 120 W light bulb (Home Depot, Dallas, TX) at 0–5 °C. The reaction was monitored by TLC. When TLC showed no starting material, the mixture was concentrated under vacuum at 0 °C. The residue was purified by silica column chromatography (1:15 EtOAc/hexanes). Compound **CHS-3** was obtained as white solid (36.1 mg, 91%). <sup>1</sup>H NMR (500 MHz, CDCl<sub>3</sub>) δ 7.10–7.89 (br m, 2H), 7.49–7.56 (m, 1H), 7.42–7.44 (m, 2H), 7.03–7.07 (m, 2H), 5.26 (s, 2H), 3.21 (s, 1H), 3.01 (s, 1H), 2.07 (s, 1H), 0.96–1.90 (m, 12H); <sup>13</sup>C NMR (125 MHz, CDCl<sub>3</sub>) δ 152.41, 147.07, 140.76, 135.31, 131.07, 130.23, 130.10, 128.12, 119.26, 111.00, 95.38, 70.28, 50.04, 36.25, 34.78, 33.11, 32.93, 32.17, 31.69, 31.50, 25.93, 25.78; LRMS (ESI) calcd for C<sub>26</sub>H<sub>26</sub>ClN<sub>3</sub>O<sub>6</sub>Na (M+Na<sup>+</sup>) 534.1408, found 534.200.

## 2. Chemiluminescent response

Chemiluminescent responses and time scans were acquired using a Hitachi F-7000 Fluorescence Spectrophotometer (Hitachi, Tokyo, Japan) using the luminescence detection module and setting emission wavelength to 545 nm. 393 μL of a 20 mM HEPES buffered to pH 7.4 (Figure 1) or 100 mM glycine buffered to pH 10.02, 100 μL Emerald II Enhancer (Life Technologies, Carlsbad, CA), 5 μL of a 20 mM Na<sub>2</sub>S stock solution in DI-H<sub>2</sub>O and 2 μL of a 10 mM stock solution of **CHS** probes in CH<sub>3</sub>CN were added to a quartz cuvette (Starna, Atascadero, CA). Samples were shaken gently to assure mixing. Then chemiluminescence spectra were acquired immediately after adding the probes. Time scans were acquired using the time scan module. 40 μM **CHS-1**, **CHS-2**, and **CHS-3** were treated with 0, 5, 10, 20, 40, 80, 100, 150, and 200 μM Na<sub>2</sub>S,<sup>1</sup> and 10 min (Figure 1, Figure S1) or 120 min (Figure S2) time scans were measured 1 min after adding probes.

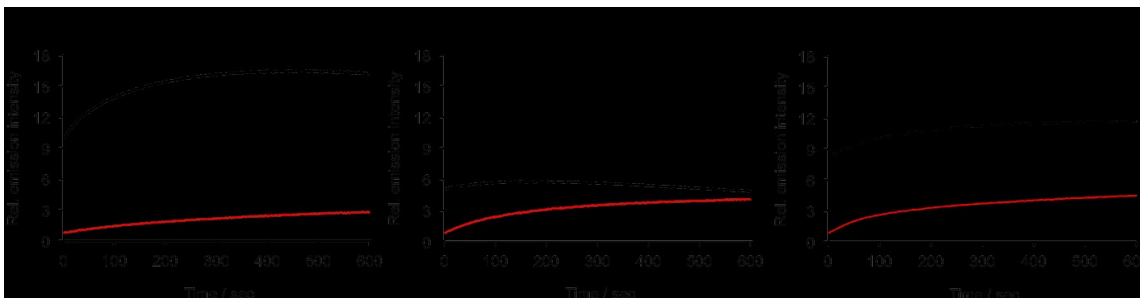

**Figure S1.** Time scans of the chemiluminescence emission at 545 nm from (a) 40  $\mu\text{M}$  **CHS-1**, (b) 40  $\mu\text{M}$  **CHS-2**, or (c) 40  $\mu\text{M}$  **CHS-3** and 0  $\mu\text{M}$  (red) or 200  $\mu\text{M}$  (black)  $\text{Na}_2\text{S}$  in 100 mM glycine buffer (pH 10.02) containing 20% Emerald II Enhancer.

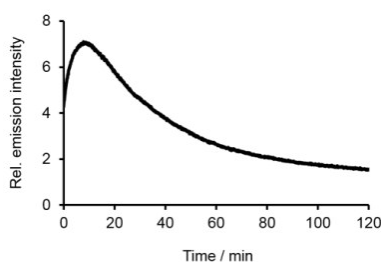

**Figure S2.** Full time scan of the chemiluminescence emission at 545 nm of 40  $\mu\text{M}$  **CHS-3** to 200  $\mu\text{M}$   $\text{Na}_2\text{S}$  in 20 mM HEPES buffer (pH 7.4) and 20% Emerald II Enhancer.

### 3. Selectivity tests

Selectivity for **CHS-1**, **CHS-2**, and **CHS-3** was measured by monitoring the time-dependent chemiluminescent emission at 545 nm. All assays were performed in 20 mM HEPES buffered to pH 7.4 with 20% Emerald II Enhancer.

$\text{H}_2\text{S}$ : 5  $\mu\text{L}$  of a 20 mM stock solution of  $\text{Na}_2\text{S}$  in  $\text{DI-H}_2\text{O}$  was added to a solution of 393  $\mu\text{L}$  HEPES and 100  $\mu\text{L}$  Emerald II Enhancer and then 2  $\mu\text{L}$  of 10 mM **CHS-1**, **CHS-2**, or **CHS-3** in  $\text{CH}_3\text{CN}$  was added into this mixture.

$\text{H}_2\text{S}$ , glutathione, cysteine and homocysteine: 5  $\mu\text{L}$  of a 20 mM stock solution of  $\text{Na}_2\text{S}$  in  $\text{DI-H}_2\text{O}$ , 25  $\mu\text{L}$  of a 100 mM stock solution of glutathione in 20 mM HEPES buffer, 5  $\mu\text{L}$  of a 100 mM stock solution of L-cysteine in  $\text{DI-H}_2\text{O}$  and 5  $\mu\text{L}$  of a 100 mM stock solution of homocysteine in  $\text{DI-H}_2\text{O}$  were added to a solution of 358  $\mu\text{L}$  HEPES and 100  $\mu\text{L}$  Emerald II Enhancer, mixed them well and then 2  $\mu\text{L}$  of 10 mM **CHS-1**, **CHS-2**, or **CHS-3** in  $\text{CH}_3\text{CN}$  was added into this mixture.

Glutathione: 25  $\mu\text{L}$  of a 100 mM stock solution of glutathione in 20 mM HEPES buffer was added to a solution of 373  $\mu\text{L}$  HEPES and 100  $\mu\text{L}$  Emerald II Enhancer and then 2  $\mu\text{L}$  of 10 mM **CHS-1**, **CHS-2**, or **CHS-3** in  $\text{CH}_3\text{CN}$  was added into this mixture.

S-nitrosoglutathione: 2  $\mu\text{L}$  of a 50 mM stock solution of S-nitrosoglutathione in DI- $\text{H}_2\text{O}$  was added to a solution of 396  $\mu\text{L}$  HEPES and 100  $\mu\text{L}$  Emerald II Enhancer and then 2  $\mu\text{L}$  of 10 mM **CHS-1**, **CHS-2**, or **CHS-3** in  $\text{CH}_3\text{CN}$  was added into this mixture.

Cysteine: 5  $\mu\text{L}$  of a 100 mM stock solution of L-cysteine in DI- $\text{H}_2\text{O}$  was added to a solution of 393  $\mu\text{L}$  HEPES and 100  $\mu\text{L}$  Emerald II Enhancer and then 2  $\mu\text{L}$  of 10 mM **CHS-1**, **CHS-2**, or **CHS-3** in  $\text{CH}_3\text{CN}$  was added into this mixture.

Homocysteine: 5  $\mu\text{L}$  of a 100 mM stock solution of homocysteine in DI- $\text{H}_2\text{O}$  was added to a solution of 393  $\mu\text{L}$  HEPES and 100  $\mu\text{L}$  Emerald II Enhancer and then 2  $\mu\text{L}$  of 10 mM **CHS-1**, **CHS-2**, or **CHS-3** in  $\text{CH}_3\text{CN}$  was added into this mixture.

HNO: Angeli's salt ( $\text{Na}_2\text{N}_2\text{O}_3$ ) was used to generate HNO. The stock solution was made by dissolving Angeli's salt in 0.01 M NaOH solution immediately prior to use. The concentration of this alkaline stock solution of Angeli's salt was measured by UV/Vis using  $\epsilon = 6100 \text{ M}^{-1} \text{ cm}^{-1}$  at 237 nm. 4  $\mu\text{L}$  of a 25 mM stock solution of Angeli's salt was added to a solution of 394  $\mu\text{L}$  HEPES and 100  $\mu\text{L}$  Emerald II Enhancer and then 2  $\mu\text{L}$  of 10 mM **CHS-1**, **CHS-2**, or **CHS-3** in  $\text{CH}_3\text{CN}$  was added into this mixture.

NO: PROLI NONOate was used to generate NO. It was stored at  $-80^\circ\text{C}$  and dissolved in 0.01 M NaOH solution immediately prior to use. The concentration of this alkaline stock solution of PROLI NONOate was measured by UV/Vis using  $\epsilon = 8400 \text{ M}^{-1} \text{ cm}^{-1}$  at 252 nm. 8  $\mu\text{L}$  of a 12.5 mM stock solution of PROLI NONOate was added to a solution of 390  $\mu\text{L}$  HEPES and 100  $\mu\text{L}$  Emerald II Enhancer and then 2  $\mu\text{L}$  of 10 mM **CHS-1**, **CHS-2**, or **CHS-3** in  $\text{CH}_3\text{CN}$  was added into this mixture.

$\text{NaNO}_2$ : 1  $\mu\text{L}$  of a 100 mM stock solution of  $\text{NaNO}_2$  in DI- $\text{H}_2\text{O}$  was added to a solution of 397  $\mu\text{L}$  HEPES and 100  $\mu\text{L}$  Emerald II Enhancer and then 2  $\mu\text{L}$  of 10 mM **CHS-1**, **CHS-2**, or **CHS-3** in  $\text{CH}_3\text{CN}$  was added into this mixture.

$\text{Na}_2\text{SO}_3$ : 1  $\mu\text{L}$  of a 100 mM stock solution of  $\text{Na}_2\text{SO}_3$  in DI- $\text{H}_2\text{O}$  was added to a solution of 397  $\mu\text{L}$  HEPES and 100  $\mu\text{L}$  Emerald II Enhancer and then 2  $\mu\text{L}$  of 10 mM **CHS-1**, **CHS-2**, or **CHS-3** in  $\text{CH}_3\text{CN}$  was added into this mixture.

$\text{H}_2\text{O}_2$ : 0.5  $\mu\text{L}$  of a 200 mM stock solution of  $\text{H}_2\text{O}_2$  in DI- $\text{H}_2\text{O}$  was added to a solution of 397.5  $\mu\text{L}$  HEPES and 100  $\mu\text{L}$  Emerald II Enhancer and then 2  $\mu\text{L}$  of 10 mM **CHS-1**, **CHS-2**, or **CHS-3** in  $\text{CH}_3\text{CN}$  was added into this mixture.



OCI<sup>-</sup>: 1  $\mu$ L of a 100 mM stock solution of OCI<sup>-</sup> in DI-H<sub>2</sub>O was added to a solution of 397  $\mu$ L HEPES and 100  $\mu$ L Emerald II Enhancer and then 2  $\mu$ L of 10 mM **CHS-1**, **CHS-2**, or **CHS-3** in CH<sub>3</sub>CN was added into this mixture.

<sup>t</sup>BuOOH: 1  $\mu$ L of a 100 mM stock solution of <sup>t</sup>BuOOH in DI-H<sub>2</sub>O was added to a solution of 397  $\mu$ L HEPES and 100  $\mu$ L Emerald II Enhancer and then 2  $\mu$ L of 10 mM **CHS-1**, **CHS-2**, or **CHS-3** in CH<sub>3</sub>CN was added into this mixture.

Blank: 2  $\mu$ L of 10 mM **CHS-1**, **CHS-2**, or **CHS-3** in CH<sub>3</sub>CN was added to a solution of 398  $\mu$ L HEPES and 100  $\mu$ L Emerald II Enhancer.

#### 4. Computational results

All the geometries were optimized using density functional theory (DFT) with B3LYP<sup>2,3,4,5</sup> functional and Pople basis set 6-311+G(d,p)<sup>6</sup> and integral equation formalism of polarizable continuum model (IEF-PCM)<sup>7</sup> with water as solvent. Atomic charges are calculated using ESP model.<sup>8</sup> The ESP charges were also calculated at using M06<sup>9</sup> and  $\omega$ B97XD<sup>10</sup> functionals and 6-311+G(d,p) basis set using IEF-PCM with water as solvent at geometries optimized at B3LYP/6-311+G(d,p) level of theory. All the calculations were carried out using Gaussian09.<sup>11</sup>

**Table S1. Cartesian coordinates and ESP charges of the phenolate released from CHS-1.**

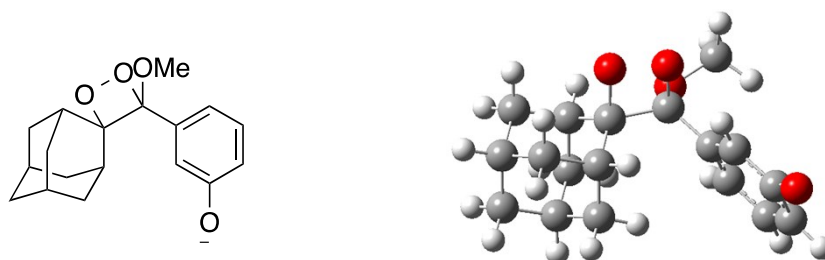

| Atoms | Coordinates |           |           | ESP Charges |           |                |
|-------|-------------|-----------|-----------|-------------|-----------|----------------|
|       | X           | Y         | Z         | B3LYP       | M06       | $\omega$ B97XD |
| C     | -0.525984   | 1.150508  | -0.203135 | 0.545303    | 0.471105  | 0.495804       |
| C     | -1.727570   | 0.285391  | 0.124617  | 0.099203    | 0.109287  | 0.117666       |
| C     | -2.083655   | 0.092001  | 1.470495  | -0.271377   | -0.284134 | -0.297094      |
| C     | -3.175031   | -0.730180 | 1.760514  | -0.119742   | -0.103717 | -0.119251      |
| C     | -3.910823   | -1.346960 | 0.754537  | -0.489714   | -0.496664 | -0.505737      |
| C     | -3.590809   | -1.171395 | -0.630272 | 0.732688    | 0.718372  | 0.726573       |
| C     | -2.458164   | -0.327224 | -0.890878 | -0.482501   | -0.479113 | -0.497363      |
| H     | -2.177752   | -0.170785 | -1.926113 | 0.134117    | 0.133390  | 0.146024       |
| H     | -1.524221   | 0.571638  | 2.263229  | 0.127048    | 0.128149  | 0.141148       |
| H     | -3.457109   | -0.889776 | 2.798020  | 0.132324    | 0.132286  | 0.144371       |
| H     | -4.757334   | -1.980048 | 1.006384  | 0.158441    | 0.159698  | 0.170194       |
| O     | 0.886032    | 1.289159  | -1.758716 | -0.234040   | -0.220551 | -0.218705      |
| O     | -0.552137   | 1.592492  | -1.592039 | -0.274019   | -0.253500 | -0.257995      |
| O     | -0.388964   | 2.245425  | 0.662459  | -0.359828   | -0.340657 | -0.344376      |

|    |           |           |           |           |                  |           |
|----|-----------|-----------|-----------|-----------|------------------|-----------|
| C  | -1.458996 | 3.199452  | 0.641049  | -0.051678 | -0.065903        | -0.097505 |
| H  | -1.581264 | 3.620117  | -0.360353 | 0.065677  | 0.073081         | 0.082881  |
| H  | -2.400056 | 2.752689  | 0.970625  | 0.046074  | 0.053406         | 0.062674  |
| H  | -1.168394 | 3.989972  | 1.331850  | 0.096263  | 0.103440         | 0.112077  |
| C  | 0.894931  | 0.542654  | -0.476542 | -0.301032 | -0.315180        | -0.331668 |
| C  | 2.072956  | 0.986778  | 0.395329  | 0.459439  | 0.424814         | 0.466294  |
| C  | 0.982428  | -0.967402 | -0.749027 | 0.477663  | 0.443191         | 0.485612  |
| C  | 3.387488  | 0.686966  | -0.361529 | -0.516053 | -0.509129        | -0.576764 |
| H  | 1.987177  | 2.056259  | 0.588102  | -0.008413 | 0.006917         | 0.008296  |
| C  | 2.058656  | 0.202573  | 1.726486  | -0.545194 | -0.536331        | -0.607069 |
| C  | 0.980257  | -1.748010 | 0.585087  | -0.622453 | -0.594505        | -0.674162 |
| C  | 2.300998  | -1.258371 | -1.500814 | -0.561967 | -0.543775        | -0.618448 |
| H  | 0.129315  | -1.269331 | -1.360870 | 0.021265  | 0.029948         | 0.033563  |
| H  | 4.232097  | 1.032165  | 0.244944  | 0.105916  | 0.112922         | 0.129743  |
| H  | 3.419685  | 1.247622  | -1.301616 | 0.105207  | 0.113368         | 0.128594  |
| C  | 3.502403  | -0.823911 | -0.638910 | 0.667617  | 0.611593         | 0.670457  |
| H  | 2.895262  | 0.542800  | 2.347007  | 0.123243  | 0.128594         | 0.147093  |
| H  | 1.140768  | 0.414965  | 2.283265  | 0.088636  | 0.098837         | 0.113524  |
| C  | 2.177369  | -1.308027 | 1.448003  | 0.642633  | 0.596155         | 0.651186  |
| H  | 0.044439  | -1.583005 | 1.124784  | 0.124333  | 0.119936         | 0.144045  |
| H  | 1.041301  | -2.819977 | 0.366152  | 0.130318  | 0.133016         | 0.152250  |
| H  | 2.313705  | -0.730443 | -2.459250 | 0.111743  | 0.117263         | 0.133609  |
| H  | 2.355114  | -2.329825 | -1.722358 | 0.115670  | 0.119557         | 0.138788  |
| C  | 3.491446  | -1.595465 | 0.695969  | -0.615873 | -0.609456        | -0.682179 |
| H  | 3.588945  | -2.671348 | 0.509269  | 0.115291  | 0.122012         | 0.139607  |
| H  | 4.349881  | -1.296970 | 1.309330  | 0.107426  | 0.115414         | 0.132729  |
| H  | 4.433667  | -1.028357 | -1.177878 | -0.075734 | -0.056419        | -0.058091 |
| O8 | -4.262270 | -1.729367 | -1.578754 | -0.945304 | <b>-0.924794</b> | -0.945863 |
| H  | 2.166090  | -1.856290 | 2.395996  | -0.058611 | -0.041926        | -0.042532 |

Table S2. Cartesian coordinates and ESP charges of the phenolate released from CHS-2.

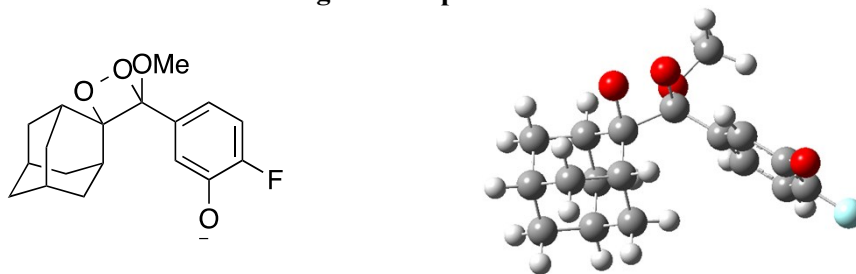

| Atoms | Coordinates |           |           | ESP Charges |           |                |
|-------|-------------|-----------|-----------|-------------|-----------|----------------|
|       | X           | Y         | Z         | B3LYP       | M06       | $\omega$ B97XD |
| C     | 0.149490    | 1.295067  | 0.147303  | 0.666428    | 0.613317  | 0.635134       |
| C     | 1.447231    | 0.538942  | -0.058484 | 0.027595    | 0.039860  | 0.041685       |
| C     | 1.888437    | 0.280587  | -1.364665 | -0.227740   | -0.236361 | -0.248862      |
| C     | 3.069166    | -0.445270 | -1.543795 | -0.313850   | -0.299083 | -0.314726      |
| C     | 3.778432    | -0.886334 | -0.446454 | 0.164508    | 0.153261  | 0.151692       |
| C     | 3.403682    | -0.658579 | 0.912787  | 0.533141    | 0.527766  | 0.531079       |

|    |           |           |           |           |                  |           |
|----|-----------|-----------|-----------|-----------|------------------|-----------|
| C  | 2.183736  | 0.082379  | 1.035332  | -0.460427 | -0.466600        | -0.478759 |
| H  | 1.837314  | 0.289506  | 2.040882  | 0.156613  | 0.157543         | 0.168896  |
| H  | 1.330477  | 0.635373  | -2.220796 | 0.146178  | 0.145784         | 0.158982  |
| H  | 3.442171  | -0.668581 | -2.538004 | 0.189167  | 0.189068         | 0.201163  |
| O  | -1.329697 | 1.410147  | 1.641708  | -0.221708 | -0.205948        | -0.205321 |
| O  | 0.071893  | 1.857398  | 1.489683  | -0.299493 | -0.282719        | -0.286349 |
| O  | -0.061869 | 2.285941  | -0.821477 | -0.377468 | -0.362749        | -0.365580 |
| C  | 0.891813  | 3.356861  | -0.842148 | -0.081532 | -0.095256        | -0.128613 |
| H  | 0.906569  | 3.878428  | 0.118145  | 0.073610  | 0.080273         | 0.090500  |
| H  | 1.895042  | 2.995397  | -1.080186 | 0.048046  | 0.053884         | 0.064272  |
| H  | 0.555873  | 4.040912  | -1.620331 | 0.107245  | 0.114679         | 0.123568  |
| C  | -1.210061 | 0.563606  | 0.429631  | -0.410019 | -0.439958        | -0.450678 |
| C  | -2.391332 | 0.806026  | -0.514636 | 0.550796  | 0.513778         | 0.556319  |
| C  | -1.151011 | -0.920189 | 0.826641  | 0.543890  | 0.511907         | 0.555224  |
| C  | -3.697592 | 0.428257  | 0.220997  | -0.589371 | -0.579830        | -0.649153 |
| H  | -2.410032 | 1.859872  | -0.793122 | -0.015794 | 0.000026         | 0.001376  |
| C  | -2.239512 | -0.075751 | -1.773927 | -0.601316 | -0.585706        | -0.660233 |
| C  | -1.011108 | -1.799538 | -0.436741 | -0.698894 | -0.666739        | -0.749373 |
| C  | -2.461963 | -1.290788 | 1.555754  | -0.639683 | -0.616966        | -0.693655 |
| H  | -0.298253 | -1.080127 | 1.490472  | 0.020949  | 0.028655         | 0.031905  |
| H  | -4.547150 | 0.629361  | -0.440989 | 0.121087  | 0.127371         | 0.144632  |
| H  | -3.828272 | 1.057647  | 1.107516  | 0.122295  | 0.130426         | 0.145595  |
| C  | -3.665526 | -1.058674 | 0.621959  | 0.723048  | 0.664696         | 0.725968  |
| H  | -3.080441 | 0.121741  | -2.448015 | 0.130847  | 0.135013         | 0.154067  |
| H  | -1.326501 | 0.187841  | -2.316539 | 0.093118  | 0.101384         | 0.117278  |
| C  | -2.211125 | -1.562837 | -1.372594 | 0.720043  | 0.668780         | 0.726384  |
| H  | -0.076344 | -1.578680 | -0.958022 | 0.130602  | 0.125136         | 0.149630  |
| H  | -0.968073 | -2.850972 | -0.131205 | 0.148104  | 0.149685         | 0.169644  |
| H  | -2.569150 | -0.693651 | 2.466582  | 0.132276  | 0.137128         | 0.153565  |
| H  | -2.412389 | -2.340833 | 1.863828  | 0.133851  | 0.136174         | 0.155828  |
| C  | -3.517799 | -1.929125 | -0.642510 | -0.729769 | -0.717799        | -0.794224 |
| H  | -3.508855 | -2.990497 | -0.368443 | 0.144229  | 0.149606         | 0.167941  |
| H  | -4.376625 | -1.775332 | -1.306291 | 0.133322  | 0.140041         | 0.158105  |
| H  | -4.591809 | -1.318302 | 1.145321  | -0.069040 | -0.050168        | -0.051929 |
| O8 | 4.088841  | -1.078040 | 1.913968  | -0.880513 | <b>-0.862369</b> | -0.882378 |
| H  | -2.102631 | -2.181758 | -2.269492 | -0.057694 | -0.041053        | -0.041458 |
| F  | 4.938444  | -1.596528 | -0.673229 | -0.286675 | -0.285937        | -0.279140 |

**Table S3. Cartesian coordinates and ESP charges of the phenolate released from CHS-3.**

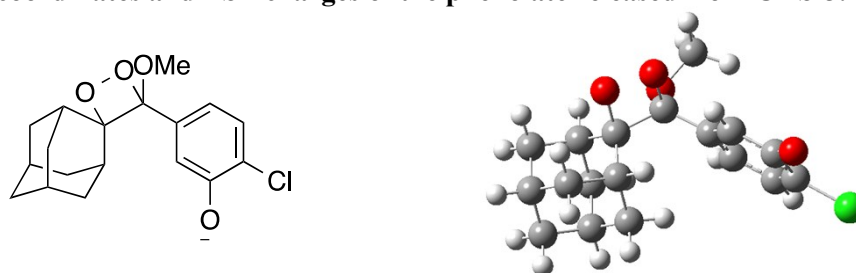

| Atoms | Coordinates |           |           | ESP Charges |           |                |
|-------|-------------|-----------|-----------|-------------|-----------|----------------|
|       | X           | Y         | Z         | B3LYP       | M06       | $\omega$ B97XD |
| C     | -0.226616   | 1.379308  | 0.084256  | 0.477044    | 0.391441  | 0.434096       |
| C     | 1.136262    | 0.725086  | -0.038113 | 0.275155    | 0.290053  | 0.286684       |
| C     | 1.629921    | 0.398308  | -1.312558 | -0.304850   | -0.316975 | -0.331510      |
| C     | 2.869203    | -0.231300 | -1.410975 | -0.140200   | -0.104783 | -0.128008      |
| C     | 3.603953    | -0.523739 | -0.270801 | -0.197996   | -0.250474 | -0.222810      |
| C     | 3.169669    | -0.211460 | 1.060595  | 0.789065    | 0.792540  | 0.789128       |
| C     | 1.883594    | 0.429928  | 1.096313  | -0.669246   | -0.662266 | -0.678151      |
| H     | 1.500428    | 0.687659  | 2.076325  | 0.185804    | 0.183499  | 0.196519       |
| H     | 1.064628    | 0.630276  | -2.205377 | 0.146778    | 0.146802  | 0.160845       |
| H     | 3.267367    | -0.495785 | -2.384260 | 0.151077    | 0.144161  | 0.159847       |
| O     | -1.739421   | 1.449315  | 1.548388  | -0.250273   | -0.236758 | -0.234096      |
| O     | -0.386703   | 2.022435  | 1.381224  | -0.269303   | -0.248082 | -0.254511      |
| O     | -0.491411   | 2.279085  | -0.956871 | -0.375806   | -0.353336 | -0.360094      |
| C     | 0.373729    | 3.420331  | -1.035139 | -0.037390   | -0.053041 | -0.084873      |
| H     | 0.315745    | 4.011511  | -0.117817 | 0.068619    | 0.076932  | 0.086152       |
| H     | 1.409742    | 3.125859  | -1.219015 | 0.031909    | 0.038941  | 0.048745       |
| H     | 0.009101    | 4.014271  | -1.872134 | 0.098118    | 0.105477  | 0.114263       |
| C     | -1.524543   | 0.550098  | 0.387797  | -0.220732   | -0.229779 | -0.256661      |
| C     | -2.704067   | 0.643036  | -0.584689 | 0.460276    | 0.424371  | 0.468665       |
| C     | -1.352091   | -0.899530 | 0.867956  | 0.502259    | 0.465498  | 0.514064       |
| C     | -3.987842   | 0.203875  | 0.156948  | -0.558241   | -0.548514 | -0.619949      |
| H     | -2.801982   | 1.674432  | -0.923733 | 0.001334    | 0.015586  | 0.017705       |
| C     | -2.462727   | -0.293736 | -1.789133 | -0.562438   | -0.547368 | -0.624448      |
| C     | -1.122839   | -1.834929 | -0.341825 | -0.666226   | -0.632362 | -0.717206      |
| C     | -2.641055   | -1.333302 | 1.602224  | -0.639705   | -0.614850 | -0.696101      |
| H     | -0.500127   | -0.952239 | 1.549769  | 0.017717    | 0.025071  | 0.028669       |
| H     | -4.840580   | 0.299402  | -0.524073 | 0.119066    | 0.125338  | 0.142934       |
| H     | -4.180994   | 0.868846  | 1.005179  | 0.116431    | 0.123826  | 0.139779       |
| C     | -3.844179   | -1.250708 | 0.642918  | 0.680415    | 0.619023  | 0.684559       |
| H     | -3.305652   | -0.202710 | -2.483282 | 0.131749    | 0.135932  | 0.155508       |
| H     | -1.565258   | 0.011735  | -2.335771 | 0.087984    | 0.096743  | 0.112776       |
| C     | -2.322938   | -1.748524 | -1.302431 | 0.638117    | 0.583720  | 0.647335       |
| H     | -0.200433   | -1.569401 | -0.864446 | 0.125111    | 0.119818  | 0.144461       |
| H     | -1.000393   | -2.860142 | 0.024952  | 0.146882    | 0.148543  | 0.168391       |

|    |           |           |           |           |                  |           |
|----|-----------|-----------|-----------|-----------|------------------|-----------|
| H  | -2.810960 | -0.696788 | 2.475937  | 0.132890  | 0.136716         | 0.154634  |
| H  | -2.513222 | -2.357182 | 1.969865  | 0.138955  | 0.141353         | 0.161574  |
| C  | -3.607974 | -2.176718 | -0.567081 | -0.680569 | -0.667777        | -0.747001 |
| H  | -3.519229 | -3.217008 | -0.232864 | 0.139088  | 0.144225         | 0.163023  |
| H  | -4.465128 | -2.130460 | -1.249182 | 0.127329  | 0.134405         | 0.152458  |
| H  | -4.755108 | -1.553702 | 1.169924  | -0.060987 | -0.041332        | -0.043684 |
| O  | 3.839950  | -0.470633 | 2.117156  | -0.907189 | <b>-0.894123</b> | -0.909589 |
| H  | -2.151668 | -2.406450 | -2.160957 | -0.041069 | -0.023678        | -0.025356 |
| Cl | 5.179273  | -1.329405 | -0.464458 | -0.206955 | -0.184515        | -0.198766 |

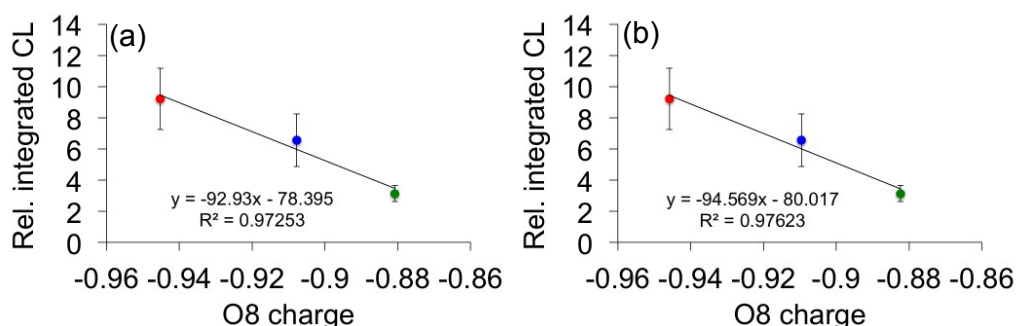

**Figure S3.** Plot of the integrated chemiluminescent emission over 10 min at pH 10 of 200  $\mu\text{M}$   $\text{Na}_2\text{S}$  and 40  $\mu\text{M}$  **CHS-1** (red), **CHS-2** (green) and **CHS-3** (blue) versus the calculated atomic charges on the phenolate oxygen (O8). All luminescent measurements were acquired in 100 mM glycine (pH 10) containing 20% Emerald II Enhancer. The reported values are averages of the integrated emission intensities over 10 min ( $n = 4-7$ ). Error bars represent  $\pm$  S.D. Geometries were optimized with B3LYP/6-311G+(d,p) and ESP atomic charges were calculated with (a) B3LYP/6-311+G(d,p) or (b)  $\omega$ B97XD/6-311+G(d,p). Calculations were carried out with the IEF-PCM water solvation model using Gaussian 09.

## 5. Cellular experiments

**Chemiluminescent response using a multi-well plate reader.** Chemiluminescent responses were measured using a BioTek plate reader (Winooski, VT) by using the luminescence detection method, endpoint read type, and setting sensitivity to 135. 120  $\mu\text{L}$ , 119  $\mu\text{L}$ , 119  $\mu\text{L}$ , 118  $\mu\text{L}$ , and 116  $\mu\text{L}$  of 20 mM HEPES buffer (pH 7.4) were added into the wells of a black opaque Corning® 96-well plate from A1 to A5 in sequence, 30  $\mu\text{L}$  Emerald II Enhancer was pipetted into each well, then different volumes of a 10 mM  $\text{Na}_2\text{S}$  solution (0  $\mu\text{L}$ , 0.38  $\mu\text{L}$ , 0.75  $\mu\text{L}$ , 1.5  $\mu\text{L}$ , 3.0  $\mu\text{L}$ ) were added into each well. 0.60  $\mu\text{L}$  **CHS-3** was injected into each well and the luminescence intensity of the plate was measured every 2 min after addition of probes. The detection limit was estimated as the amount of  $\text{Na}_2\text{S}$  required to give a chemiluminescent signal above three times the standard deviation of at least 3 independent experiments with 0  $\mu\text{M}$   $\text{Na}_2\text{S}$ . The concentration of  $\text{Na}_2\text{S}$  needed was estimated by fitting a line to the linear region of the curve between the data points corresponding to 0  $\mu\text{M}$   $\text{Na}_2\text{S}$  and 25  $\mu\text{M}$   $\text{Na}_2\text{S}$ .

**Cell culture and detecting cellular  $\text{H}_2\text{S}$  using a multi-well plate reader.** Human lung adenocarcinoma epithelial cell (A549) were purchased from ATCC and cultured in F-12K media supplemented with 10% Fetal Calf Serum (FCS) at 37  $^\circ\text{C}$  with 5%  $\text{CO}_2$ . Two days before the

experiment, cells were passed and plated on Costar® 12-well plates by adding 150K–175K of A549 cells per well, filling each well up to 600  $\mu$ L of media with FCS, and aspirating the media upon 90–95% confluence. Cells were serum-starved for 18 h prior to the experiment. Stock solutions of 20 mM homocysteine and 20 mM D,L-propargyl glycine (PAG) were prepared in 20 mM HEPES buffer (pH 7.4) and 10 mM **CHS-3** was prepared in  $\text{CH}_3\text{CN}$ . 6  $\mu$ L PAG (final concentration: 200  $\mu$ M) was added to C1–C3 of the 12-well plate. After 20 min incubation, 6  $\mu$ L homocysteine (final concentration: 200  $\mu$ M) was added into B1–B3 and C1–C3 of the 12-well plate, and 6  $\mu$ L 20 mM HEPES buffer (pH 7.4) as a vehicle control was added to A1–A3. After another 20 min incubation, cells were washed with 1 x PBS. Then 500  $\mu$ L PBS media was added into each well after aspirating the media. 125  $\mu$ L Emerald II Enhancer and 2.7  $\mu$ L **CHS-3** (final concentration: 40  $\mu$ M) were added to each well and the luminescent intensity was measured every two minutes for 20 minutes. The experiment was repeated with four independent well plates and the peak value for the luminescence emission for each well at 10–12 minutes was normalized to the average luminescence emission at 10–12 minutes for the control replicates of each plate. A single outlier was rejected according to the extreme studentized deviate method (Grubbs' test,  $p < 0.01$ ).

## 6. Imaging experiments

**Chemiluminescent imaging at pH 7.4.** Imaging was carried out with a Caliper Xenogen IVIS® Spectrum (Perkin-Elmer, Santa Clara, CA) in black 96-well Costar® plates and all the images were analyzed using Living Image 3.1 software. 10 mM **CHS-3** in  $\text{CH}_3\text{CN}$  and 10 mM  $\text{Na}_2\text{S}$  in DI- $\text{H}_2\text{O}$  were prepared prior to imaging. 199  $\mu$ L, 198  $\mu$ L, 198  $\mu$ L, 197  $\mu$ L and 195  $\mu$ L of 20 mM HEPES buffer (pH 7.4) were added into wells from A1 to A5 in sequence, 50  $\mu$ L Emerald II Enhancer was pipetted into each well, then different volume of  $\text{Na}_2\text{S}$  solution (0  $\mu$ L, 0.61  $\mu$ L, 1.25  $\mu$ L, 2.5  $\mu$ L, 5.0  $\mu$ L) were added into each well. 1  $\mu$ L **CHS-3** was injected into the mixture and imaging was performed after 30 seconds using an open filter. All images were acquired with f-stop 1, medium binning, auto exposure and the chamber set to 37 °C.

**Imaging  $\text{H}_2\text{S}$  in mouse carcass.** A stock solution of 25 mM **CHS-3** in DMSO and 50 mM  $\text{Na}_2\text{S}$  in DI- $\text{H}_2\text{O}$  were prepared in advance. The 50 mM stock solution of  $\text{Na}_2\text{S}$  was diluted to provide a final concentration of 4 mM  $\text{Na}_2\text{S}$  in 100  $\mu$ L (0.4  $\mu$ mol) to be injected. Images were acquired 30 sec after administering i.p. injections to the carcasses of SCID/BALB-C mice with 0.08  $\mu$ mol **CHS-3** and either 0.4  $\mu$ mol  $\text{Na}_2\text{S}$  or a vehicle control ( $\text{H}_2\text{O}$ ) in HEPES buffered at pH 7.4 containing 20% Emerald II Enhancer (Figure S4a–d).

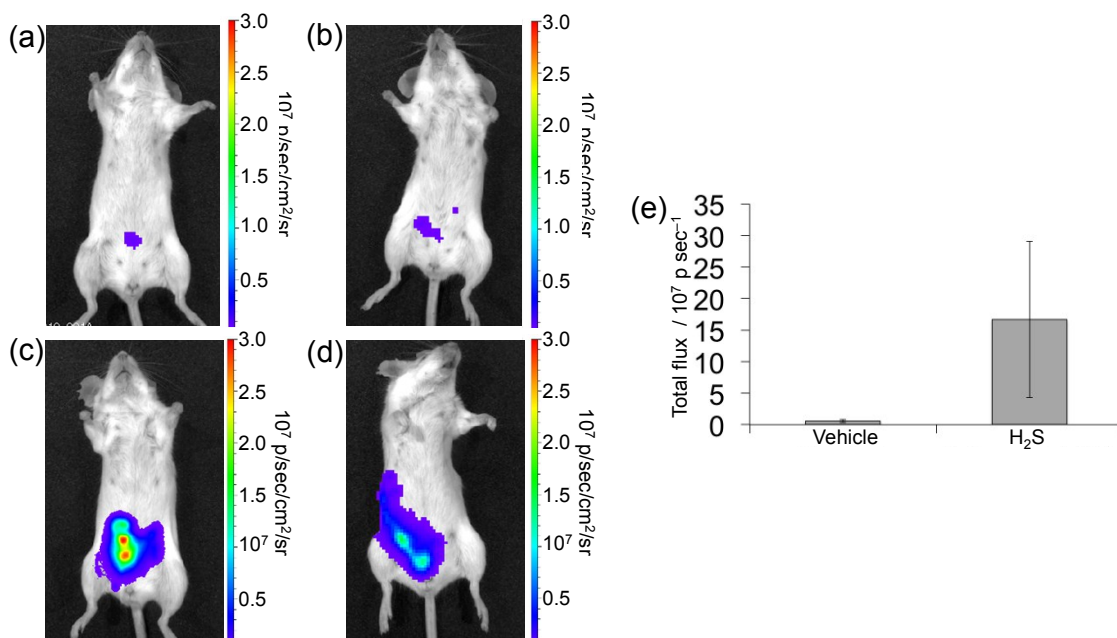

**Figure S4.** Imaging H<sub>2</sub>S in SCID/BALB-C mouse carcasses using **CHS-3**. Images were obtained 30 sec after administering an i.p. injection of 0.08  $\mu$ mol **CHS-3** and (a–b) vehicle control or (c–d) 0.4  $\mu$ mol Na<sub>2</sub>S in 100  $\mu$ L 20 mM HEPES at pH 7.4 containing 20% Emerald II Enhancer. (e) Quantification of the total photon flux from experiments described in (a)–(d). Error bars are  $\pm$  S.D.

**Imaging H<sub>2</sub>S in living mice.** The UT Southwestern Institutional Animal Care and Use Committee approved these investigations under APN #2009-0150. A stock solution of 25 mM **CHS-3** in DMSO and 50 mM Na<sub>2</sub>S in DI-H<sub>2</sub>O were prepared in advance. The 50 mM stock solution of Na<sub>2</sub>S was diluted to provide a final concentration of 4 mM Na<sub>2</sub>S in 100  $\mu$ L (0.4  $\mu$ mol) to be injected. Images were acquired 30 sec after administering i.p. injections to C6 brown mice with 0.08  $\mu$ mol **CHS-3** and either 0.4  $\mu$ mol Na<sub>2</sub>S or a vehicle control (H<sub>2</sub>O) in HEPES buffered at pH 7.4 containing 20% Emerald II Enhancer (Figure S5a–f). The skin was raised during injections to avoid puncturing internal organs. The final concentration of Na<sub>2</sub>S in the injection was 4 mM.



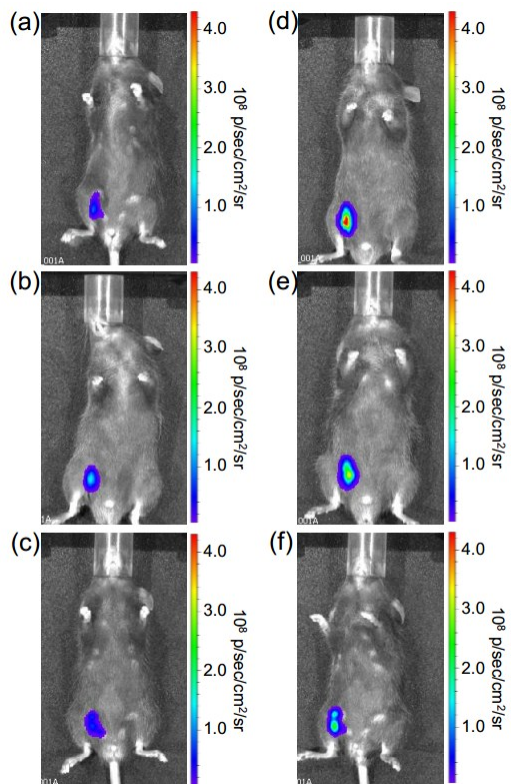

**Figure S5.** Imaging H<sub>2</sub>S in living C6 brown mice using **CHS-3**. Images were taken 30 sec after administering an i.p. injection of 0.08  $\mu\text{mol}$  **CHS-3** and (a–c) vehicle control or (d–f) 0.4  $\mu\text{mol}$  Na<sub>2</sub>S in 100  $\mu\text{L}$  20 mM HEPES at pH 7.4 containing 20% Emerald II Enhancer.



7. <sup>1</sup>H and <sup>13</sup>C NMR spectra

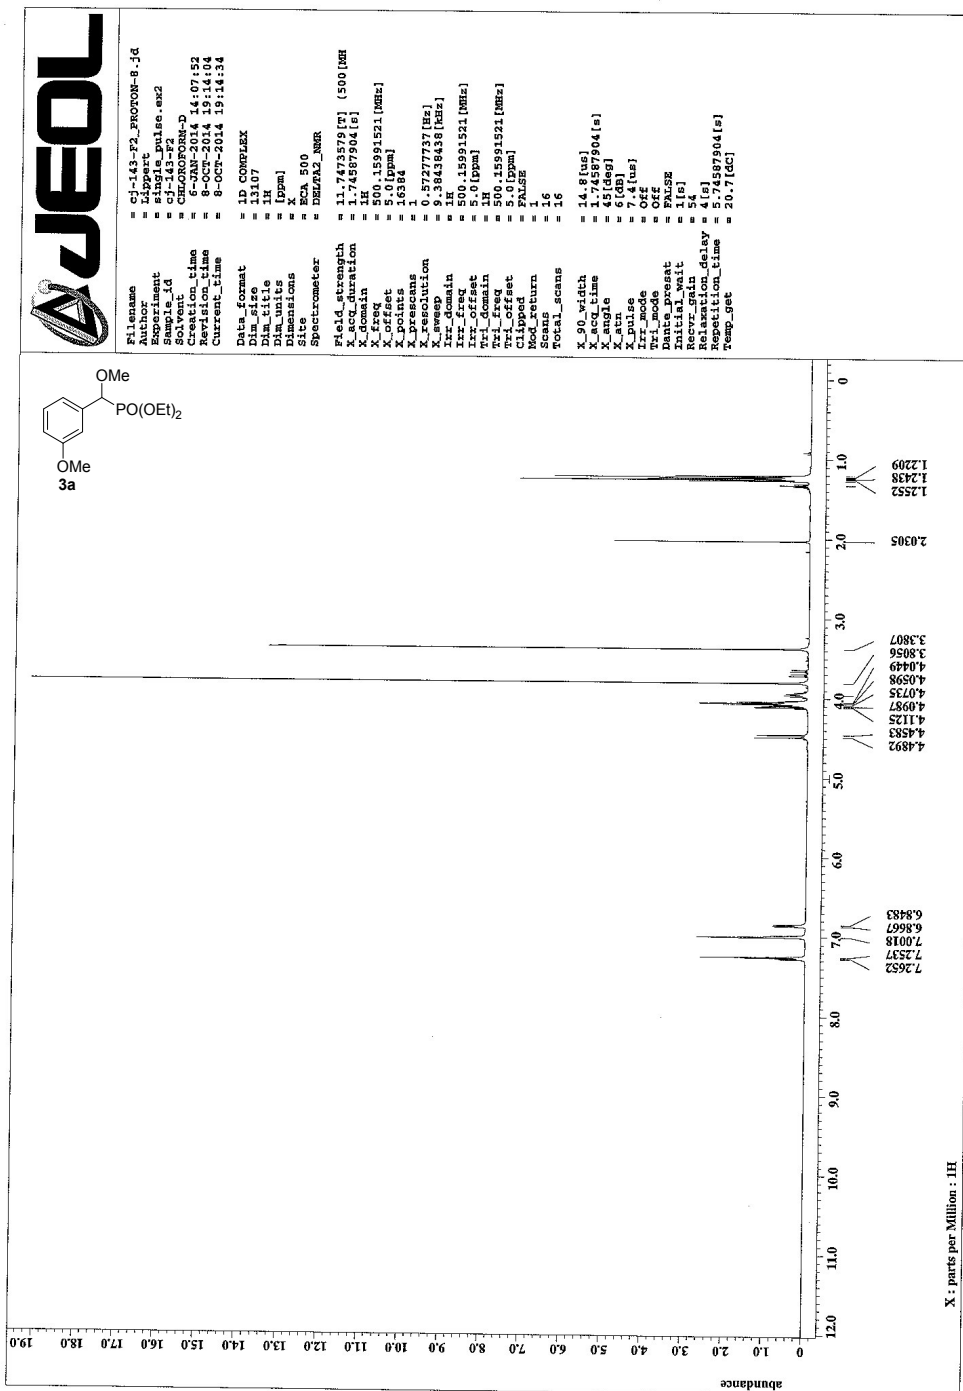

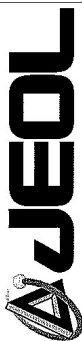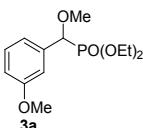

Filename = c:\CHS-1-phosphite\_CA  
Author = Lippert  
Experiment = single\_wise\_dec  
Sample = CHS-1-phosphite  
Solvent = CDCl3  
Creation\_time = 8-SEP-2014 11:14:12  
Revision\_time = 10-OCT-2014 14:29:20  
Current\_time = 10-OCT-2014 14:29:52

Data\_format = 1D COMPLEX  
Dir\_size = 26214  
Dir\_title = 13C  
Dir\_path = X  
Dimensions = X  
Site = ECA 500  
Spectrometer = DELTA2\_MMR

Field strength = 11.747379 [G] (500 [MHZ])  
X\_acq\_duration = 0.83361792 [s]  
X\_domain = 13C  
X\_offset = 6529766 [Hz]  
X\_points = 100 [ppm]  
X\_prescans = 4  
X\_resolution = 4.885894 [Hz]  
X\_resolution\_ppm = 39.3082761 [ppm]  
Irr\_domain = 1H  
Irr\_freq = 500.15991521 [MHz]  
Irr\_power = 1.0 [dB]  
Clip\_ppm = 10 [ppm]  
Mod\_return = 1  
Scans = 121  
Total\_scans = 121

X\_90\_width = 14.28 [us]  
X\_acq\_time = 0.83361792 [s]  
X\_angle = 30 [deg]  
X\_p1 = 1.0 [us]  
X\_pulse = 4.76 [us]  
Irr\_atn\_dec = 21 [dB]  
Irr\_atn\_poc = 21 [dB]  
Decoupling = WURZ  
Initial\_wait = 1 [s]  
Noe\_time = TRUE  
Recvr\_gain = 60 [s]  
Relaxation\_delay = 2 [s]  
Repetition\_time = 2.83361792 [s]  
Temp\_set = 21.5 [C]

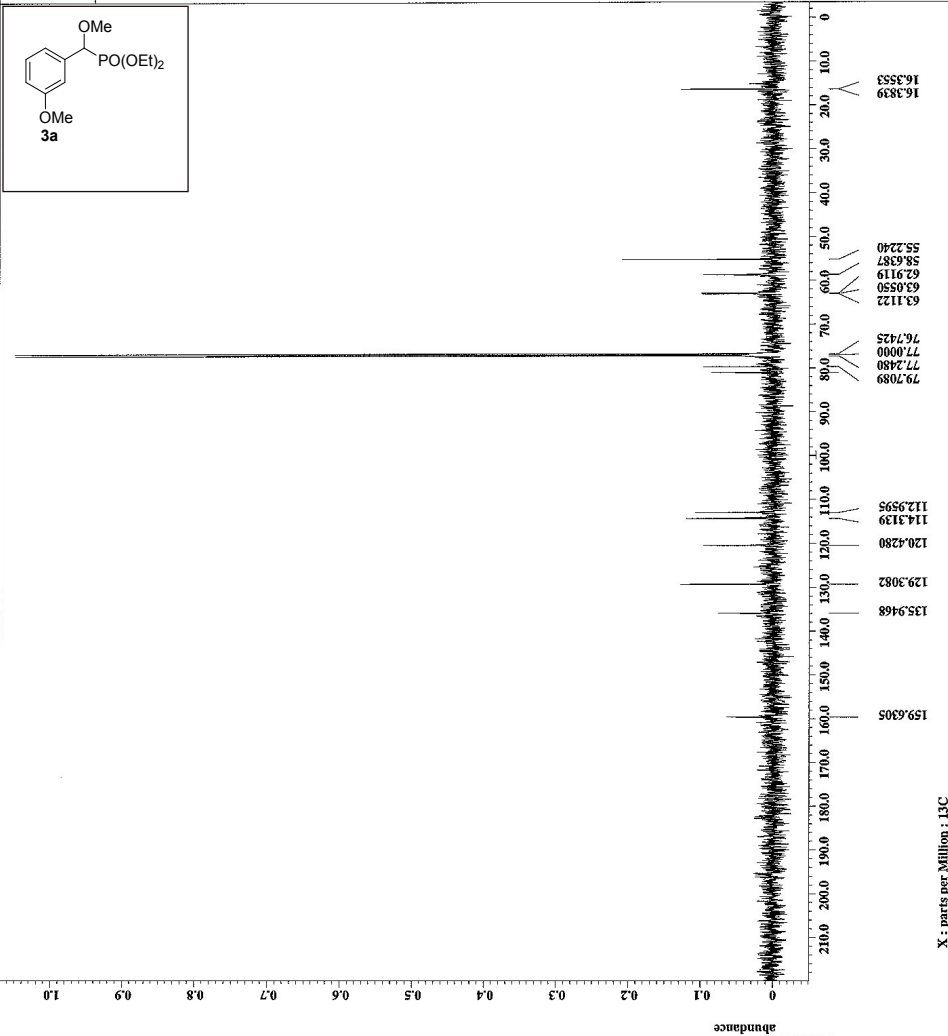

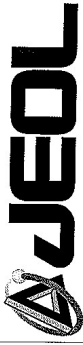

File Name = cf-F-phosphate\_PROTON  
Author = Kippert  
Experiment = single\_pulse.exe2  
Acq Date = 13-JUN-2014 13:04:42  
Solvent = CDCl3-phosphate  
Creation Time = 8-OCT-2014 19:15:45  
Revision Time = 8-OCT-2014 19:16:01  
Current Time = 8-OCT-2014 19:16:01  
Data Format = ID COMPLEX  
Dim Size = 13107  
Dim Unit = Hz  
Dimensions = X [ppm]  
Site = ECA 500  
Spectrometer = DELTA2\_MMR  
Field Strength = 11.7478797 [T] (500 MHz)  
X\_acq\_duration = 1.74587904 [s]  
X\_domain = Hz  
X\_freq = 500.15991521 [MHz]  
X\_offset = 5.0 [ppm]  
X\_points = 16384  
X\_resolution = 1  
X\_resolution\_ppm = 0.57277737 [Hz]  
X\_sweep = Hz  
X\_sweep\_ppm = 11.86436438 [MHz]  
Irr\_domain = Hz  
Irr\_freq = 500.15991521 [MHz]  
Irr\_offset = 5.0 [ppm]  
Tri\_domain = Hz  
Tri\_freq = 500.15991521 [MHz]  
Tri\_offset = 5.0 [ppm]  
Acq\_return = FALSE  
Total\_scans = 16  
X\_90\_width = 15.5 [us]  
X\_acq\_time = 1.74587904 [s]  
X\_angle = 45 [deg]  
X\_cp = 5 [dB]  
X\_cp2 = 5 [us]  
Irr\_mode = Off  
Irr\_mode2 = Off  
Data\_preset = FALSE  
Data\_resolution = 0.57277737 [Hz]  
Recvr\_gain = 24  
Relaxation\_delay = 4 [s]  
Repetition\_time = 5.74587904 [s]  
Temp\_set = 20.8 [dC]

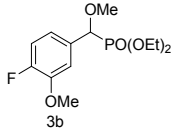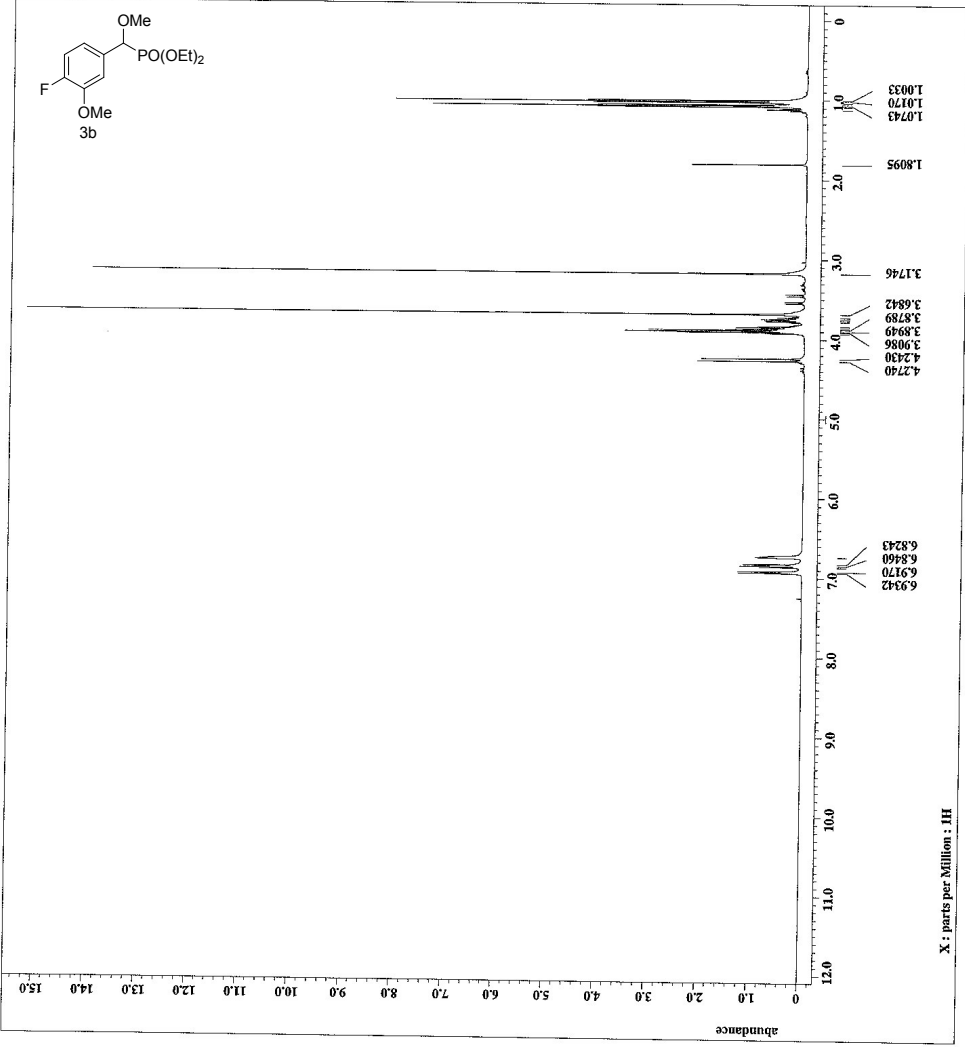

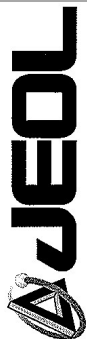

File name = cf-F-phosphate\_CARBON  
Author = Lippert  
Sample name = 15g\_P1016\_001  
Solvent = CHLOROFORM-D  
Creation time = 2-JUN-2014 14:41:20  
Revision time = 10-OCT-2014 12:18:56  
Current time = 10-OCT-2014 12:19:47

Data format = 1D COMPLEX  
Dim size = 32768  
Dim unit = Hz  
Dim units = [ppm]  
Dimensions = X  
Site = ECA 500  
Spectrometer = DELTA\_MK2

Field strength = 11.7473579 [T] (500 MHz)  
X\_acq\_duration = 0.83361792 [s]  
X\_domain = 125.76529768 [MHz]  
X\_offset = 100 [ppm]  
X\_points = 32768  
X\_prescans = 4  
X\_resolution = 1.9858934 [Hz]  
X\_sweep = 39.3081761 [kHz]  
Irr\_domain = 1H  
Irr\_freq = 500.15991521 [MHz]  
Irr\_pwr = 10 [dBm]  
Clipped = FALSE  
Mod\_return = 1  
Scans = 73  
Total\_scans = 73

X\_90\_width = 14.28 [us]  
X\_acq\_time = 0.83361792 [s]  
X\_cpd = 0 [cpd]  
X\_atn = 9 [dB]  
X\_pulse = 4.76 [us]  
Irr\_atn\_dec = 23 [dB]  
Irr\_offset = 100 [ppm]  
Irr\_phase = WALTZ  
Decoupling = WALTZ  
Initial\_wait = 1 [s]  
No time = 2 [min]  
No time = 2 [min]  
Recvr\_gain = 56  
Relaxation\_delay = 2 [s]  
Repetition\_time = 2.83361792 [s]  
Temp\_set = 21 [C]

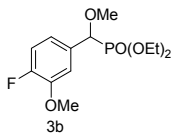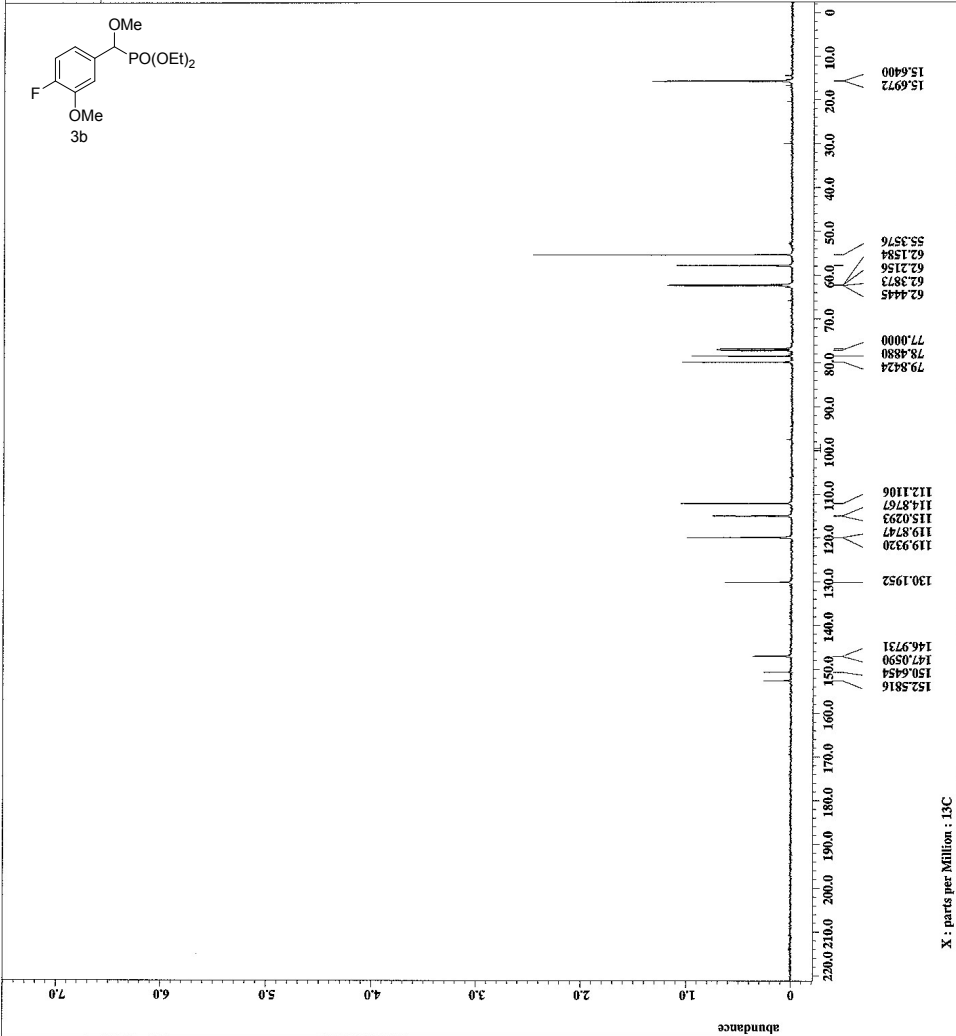

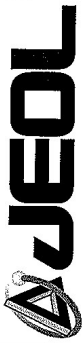

```

Filename = c:\-216-Fl_PROTON-8.fid
Author = kippert
Experiment = single_pulse.ex2
Field = 500
Solvent = CDCl3
Spectrum = CHLOROPORM-D
Creation_time = 7-MAY-2014 12:56:39
Revision_time = 8-OCT-2014 19:16:59
Current_time = 8-OCT-2014 19:17:23

Data_format = 1D COMPLEX
Dim_psize = 13107
Dim_xsize = 65534
Dim_units = Hz
Dimensions = X
Site = ECA 500
Spectrometer = DELTA2_DMR

Field_strength = 11.7473579 [T] (500 [MHz])
X_acq_duration = 1.74587904 [s]
X_domain = 11.74587904 [s]
X_offset = 5.0 [ppm]
X_points = 16384
X_prescans = 1
X_resolution = 1.579777 [Hz]
X_sweep = 9.3843448 [MHz]
X_start = 11.74587904 [T]
X_domain = 11.74587904 [T]
X_freq = 500.15591521 [MHz]
X_offset = 5.0 [ppm]
X_start = 500.15591521 [MHz]
X_offset = 5.0 [ppm]
Mod_return = FALSE
Total_scans = 16

X_90_width = 14.8 [us]
X_acq_time = 1.74587904 [s]
X_angle = 45 [deg]
X_pulses = 5
X_pulprg = zgpg30
X_pulse = zgpg30
X_mode = Off [us]
X_mode = Off
Data_preset = FALSE
Data_processing = zgpg30
Recvr_gain = 28
Relaxation_delay = 4 [s]
Repetition_time = 5.74587904 [s]
Pump_set = 20.3 [deg]
  
```

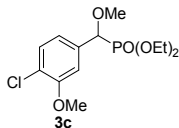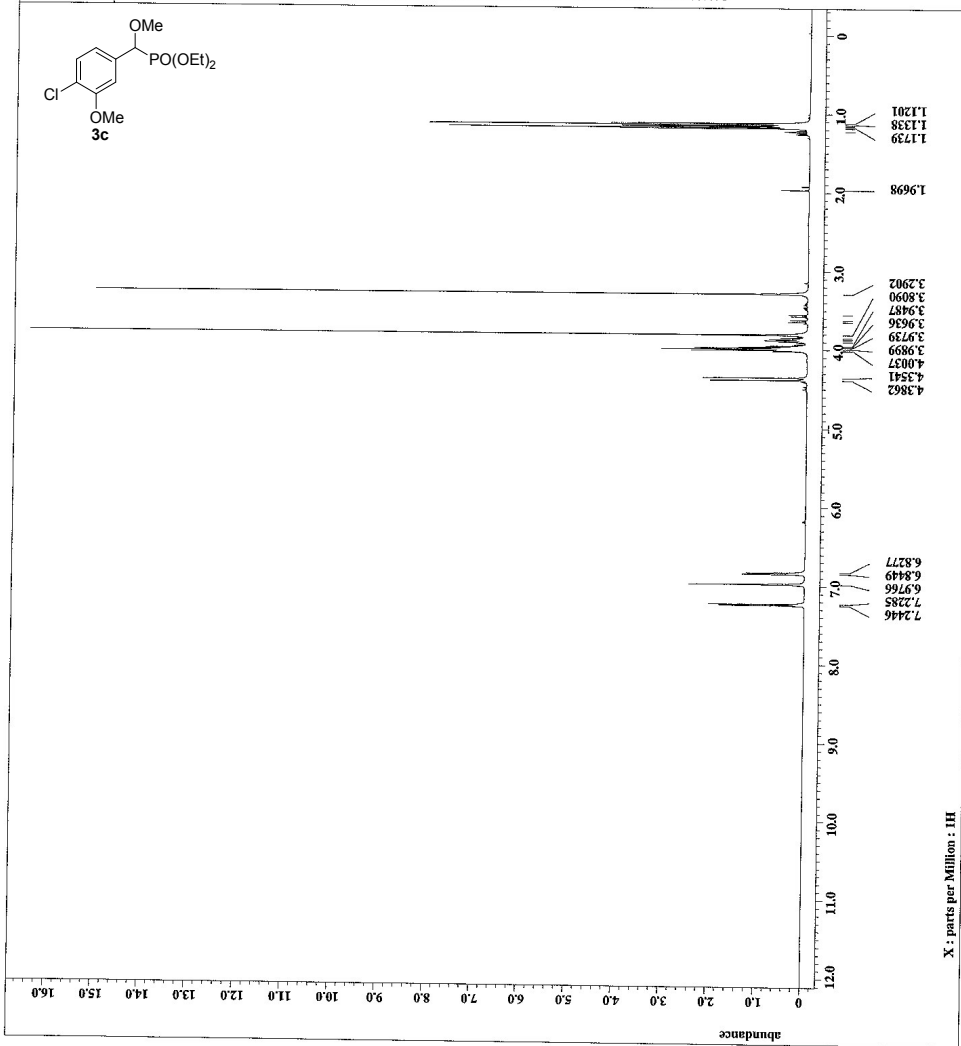

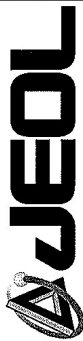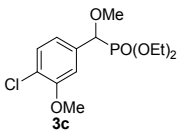

```

File Name      = ci-cl-phosphate_CASO
Author        = Lippert
Experiment    = single_pulse_dec
Sample       = Cl-phosphate
Sample_ID    = Cl-phosphate
Date_ Acq    = 2-JUN-2014 12:26:58
Creation Time = 10-OCT-2014 12:10:20
Revision Time = 10-OCT-2014 12:10:53
Current Time  = 10-OCT-2014 12:10:53

Data Format    = 1D COMPLEX
Dim Size     = 26214
Dim Title    = 13C
P1           = 13C
Dimensions   = X
Site         = ECA 500
Spectrometer = DELTA2_NMR

Field Strength = 11.7473579 [G] (500 MHz)
X_acq_duration = 0.81361792 [s]
X_domain       = 13C
X_freq         = 125.76329766 [MHz]
X_offset       = 120.000000 [ppm]
X_points       = 32768
X_prescans     = 4
X_resolution   = 1.1959034 [Hz]
X_sfs          = 12.3881761 [MHz]
Irr_domain     = 1H
Irr_freq       = 500.15991521 [MHz]
Irr_offset     = 5.0 [ppm]
Mod_return     = 1
Total_scans    = 92

X_90_width    = 14.28 [us]
X_acq_time    = 0.81361792 [s]
X_angle       = 30 [deg]
X_p1          = 12.00 [us]
X_pulse       = 4.76 [us]
Irr_atn_dec   = 23 [dB]
Irr_atn_rec   = 23 [dB]
SFOFF         = 120.00 [ppm]
Decoupling    = WALTZ
Initial_wait  = 1 [s]
Noe           = TRUE
Noe_time      = 5 [s]
Noe_delay     = 58 [s]
Relaxation_delay = 2 [s]
Repetition_time = 2.81361792 [s]
Temp_set      = 20.7 [dC]
  
```

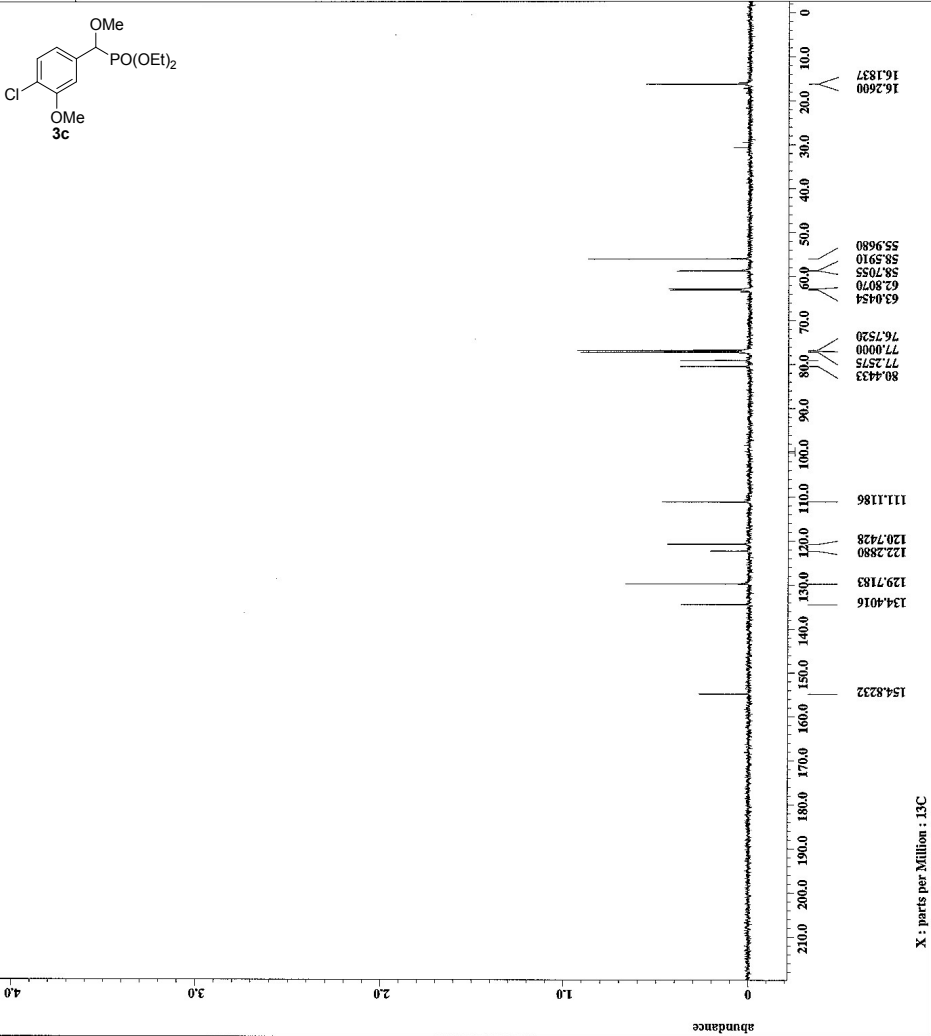

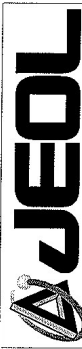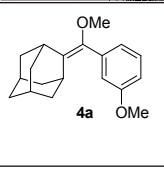

Filename = c:\ex-FL\_PHONON-7.jdf  
Author = Lipper  
Experiment = single\_pulse.ex2  
Acq Date = 2013-08-16  
Solvent = CDCl3  
Creation Time = 16-AUG-2013 10:41:17  
Revision Time = 8-OCT-2014 19:18:57  
Current Time = 8-OCT-2014 19:19:24  
Data format = ID COMPLEX  
Dir\_size = 13107  
Dir\_title =  
Dir\_unit = X [ppm]  
Dimensions = X  
Site = ECA 500  
Spectrometer = DELTA2\_NMR  
Field strength = 11.74757973 [500 MHz]  
X\_acq\_duration = 1.74597904 [s]  
X\_domain = 1H  
X\_f1\_freq = 500.15991521 [MHz]  
X\_offset = 5.0 [ppm]  
X\_points = 16384  
X\_presamp = 1  
X\_resolution = 9.5707717 [Hz]  
X\_sweep = 1M  
X1\_domain = 1H  
X1\_freq = 500.15991521 [MHz]  
X1\_offset = 5.0 [ppm]  
X2\_domain = 1H  
X2\_freq = 500.15991521 [MHz]  
X2\_offset = 5.0 [ppm]  
Acq\_start = FALSE  
Acq\_return = TRUE  
Total\_scans = 16  
X\_90\_width = 14.8 [us]  
X\_acq\_time = 1.74597904 [s]  
X\_angle = 45 [deg]  
X\_atn = 5 [dB]  
X\_tune = Off [us]  
X1\_mode = Off  
X2\_mode = Off  
Data\_preset = FULSE  
Data\_resolution = 0.703 [Hz]  
Recvr\_gain = 26  
Relaxation\_delay = 4 [s]  
Repetition\_time = 5.74597904 [s]  
Temp\_set = 21.4 [dC]

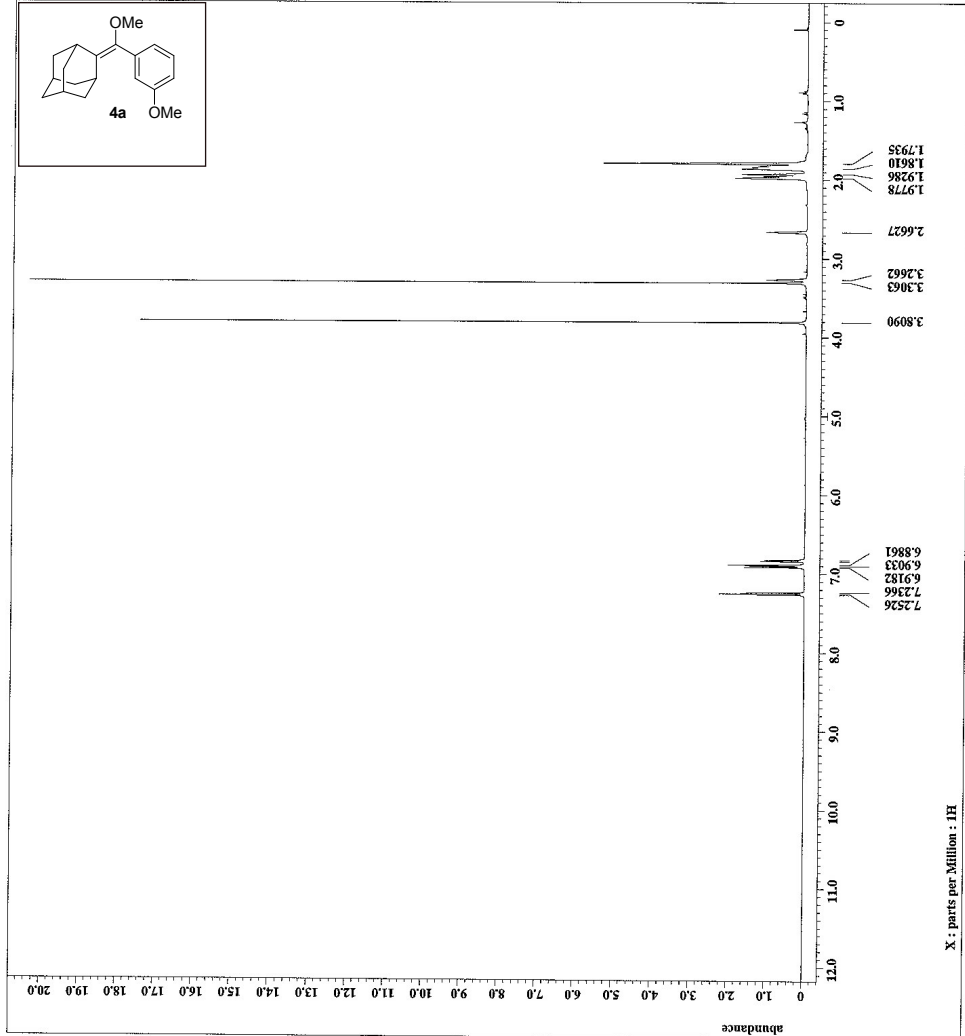

X : parts per Million - 1H

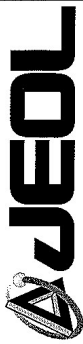

File Name = c:\CHS-1\_enol\_ether\_C  
Author = Lippert  
Experiment = single\_pulse\_dec  
Sample ID = CHS-1\_enol\_ether  
Solve ID = CHS-1\_enol\_ether  
Creation Time = 27-AUG-2014 17:45:32  
Revision Time = 27-AUG-2014 17:56:37  
Current Time = 27-AUG-2014 17:56:46  
Comment = 4  
Data Format = ID COMPLEX  
Data Size = 26214  
Date = 2014  
Dim Units = [ppm]  
Dimensions = X  
Site = ECA 500  
Spectrometer = DELTA2\_MMR  
Field Strength = 11.747379 [T] (500 [MHZ])  
X\_acq\_duration = 0.83361792 [s]  
X\_domain = 128.76529768 [MHz]  
X\_offset = 100 [ppm]  
X\_points = 32768  
X\_prescans = 1  
X\_resolution = 1.9989034 [Hz]  
X\_sweep = 39.3081761 [MHz]  
Irr\_domain = IR  
Irr\_freq = 500.19991521 [MHz]  
Irr\_offset = 100 [ppm]  
Clipped = FALSE  
Mod\_return = 1  
Scans = 34  
Total\_scans = 34  
X\_90\_width = 14.28 [us]  
X\_acq\_time = 0.83361792 [s]  
X\_gate = 9 [dB]  
X\_pulse = 4.76 [us]  
Irr\_atn\_dec = 23 [dB]  
Irr\_atn\_inc = 23 [dB]  
Irr\_noise = TRUE  
Decoupling = WALTZ  
Initial\_wait = 1 [s]  
Noe\_time = 2 [s]  
Recvr\_gain = 56  
Relaxation\_delay = 2 [s]  
Repetition\_time = 2.83361792 [s]  
Temp\_set = 20.5 [C]

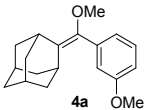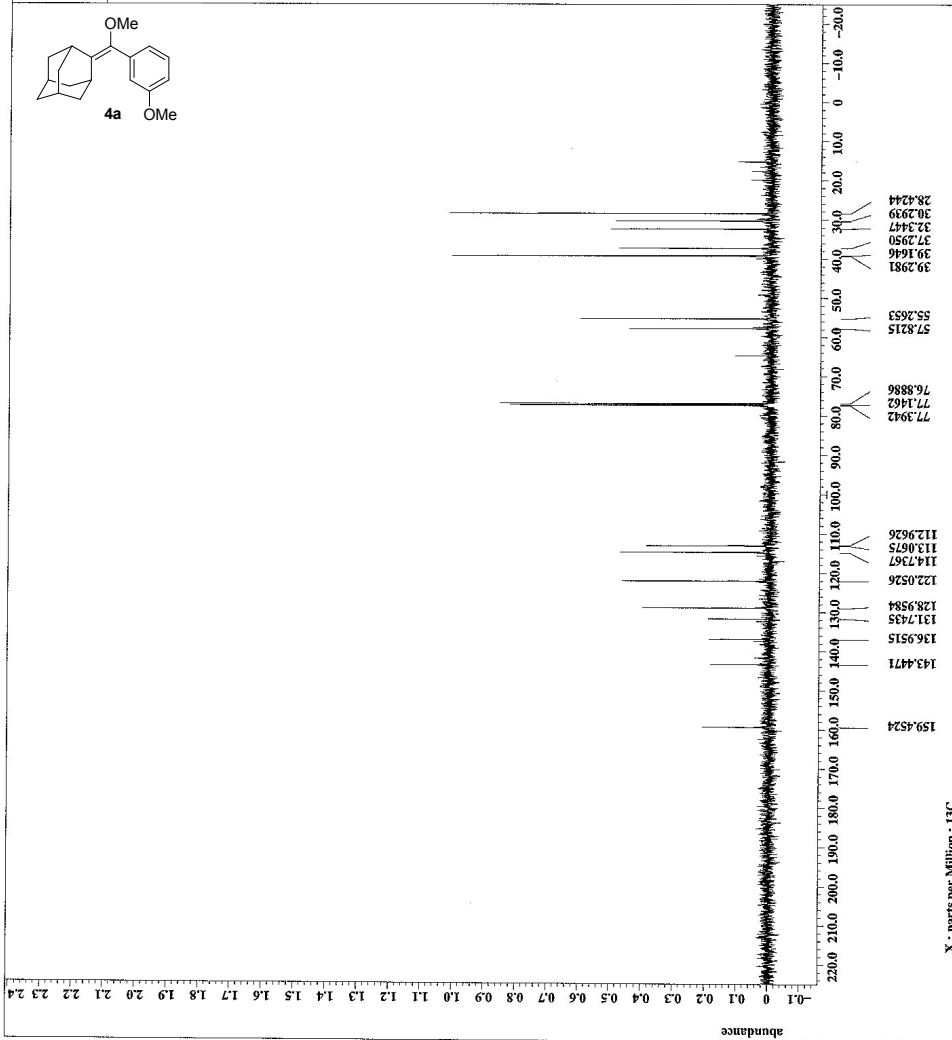



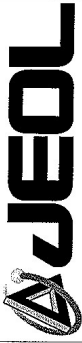

```

= c1-f-enol_ether_PROTO
= libpert
= single_pulse.exe2
= CHLOROFORM-d
= CHLOROFORM-d
Creation_time = 27-JUN-2014 18:07:45
Revision_time = 8-OCT-2014 19:21:22
Current_time = 8-OCT-2014 19:21:39
Comment = 9
Data_format = 1D COMPLEX
P1 = 18.07
P2 = 18.07
P3 = 18.07
Dim_units [ppm]
Dimensions = X
P1 = 500
P2 = 500
Spectrometer = BMRAC_NMR
Field_strength = 11.743579 [T] (500 [MHZ])
X_acq_duration = 1.74897904 [s]
X_acq_time = 1.74897904 [s]
X_freq = 500.15591521 [MHZ]
X_offset = 5.0 [ppm]
X_points = 16384
X_resolution = 0.5727737 [Hz]
X_sweep = 9.3843848 [MHz]
Xf_domain = 18.07
Xf_freq = 500.15591521 [MHZ]
Xf_offset = 5.0 [ppm]
Xf_domain = 18.07
Xf_freq = 500.15591521 [MHZ]
Xf_offset = 5.0 [ppm]
Clipped = FALSE
Mod_return = 1
Scans = 16
Total_scans = 16
X_p0_width = 15.5 [us]
X_acq_time = 1.74897904 [s]
X_freq = 500.15591521 [MHZ]
X_offset = 5.0 [ppm]
X_pulse = 7.75 [us]
Xf_mode = Off
Xf_offset = Off
Xf_delay = Off
Xf_delay_wait = 1 [us]
Xf_gain = 48
Relaxation_delay = 4 [s]
Relaxation_time = 21.3 [s]
Temp_Set = 31.3 [C]

```

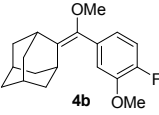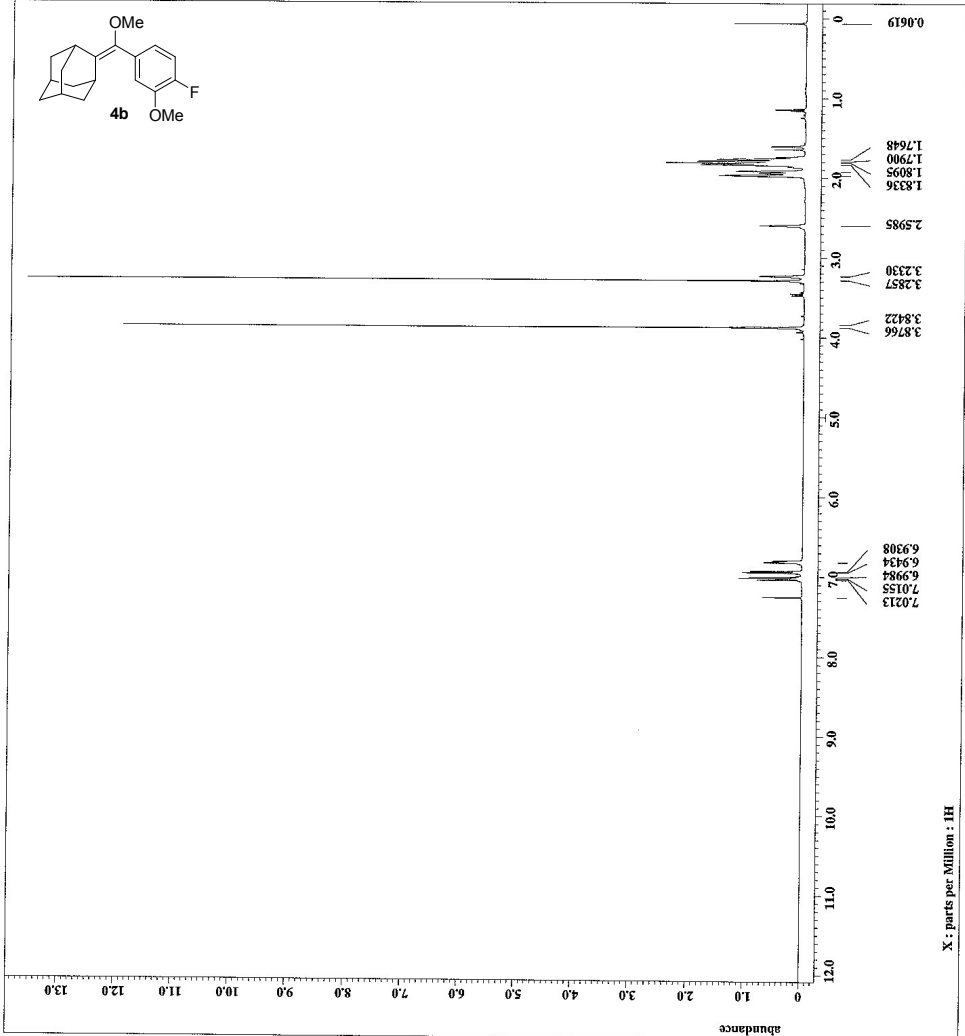

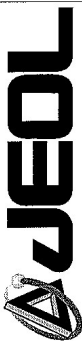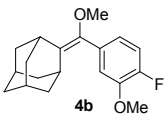

Filename = cf-f-emo1\_ether\_CARBO  
Author = Lippert  
Experiment = single\_pulse\_dec  
Date\_acq = 27-JUN-2014 18:23:59  
Solvent = CDCl3  
Pulse\_prog = zgpg30  
Creation\_time = 27-JUN-2014 18:14:31  
Revision\_time = 27-JUN-2014 18:23:59  
Current\_time = 27-JUN-2014 18:24:15  
Comment = 9  
Data\_format = 1D\_COMPLEX  
Dir = 13C  
Dim\_units = [ppm]  
Dimensions = X  
Site = ECA\_500  
Spectrometer = spect  
Field\_strength = 11.747379 [T] (500 [MHz])  
X\_acq\_duration = 0.83361792 [s]  
X\_center = 125.76529768 [MHz]  
X\_freq = 100 [ppm]  
X\_offset = 32768  
X\_points = 65536  
X\_resolution = 1.49959034 [Hz]  
X\_sweep = 39.3081761 [kHz]  
Irr\_demod = 18.45891521 [kHz]  
Irr\_freq = 5.0 [ppm]  
Irr\_offset = FALSE  
Mod\_return = 1  
Scan = 122  
Total\_scans = 122  
X\_90\_width = 14.28 [us]  
X\_acq\_time = 30.02361792 [s]  
X\_att = 9 [dB]  
X\_atn = 9 [dB]  
X\_pulse = 4.76 [us]  
Irr\_atn\_dec = 23 [dB]  
Irr\_atn\_prog = 23 [dB]  
Irr\_noise = WALTZ  
Decoupling = TRUE  
Initial\_wait = 1 [s]  
Noe\_time = 2 [s]  
Recvr\_gain = 56  
Relaxation\_delay = 2 [s]  
Spectrum\_time = 1.87361792 [s]  
Temp\_set = 21.7 [C]

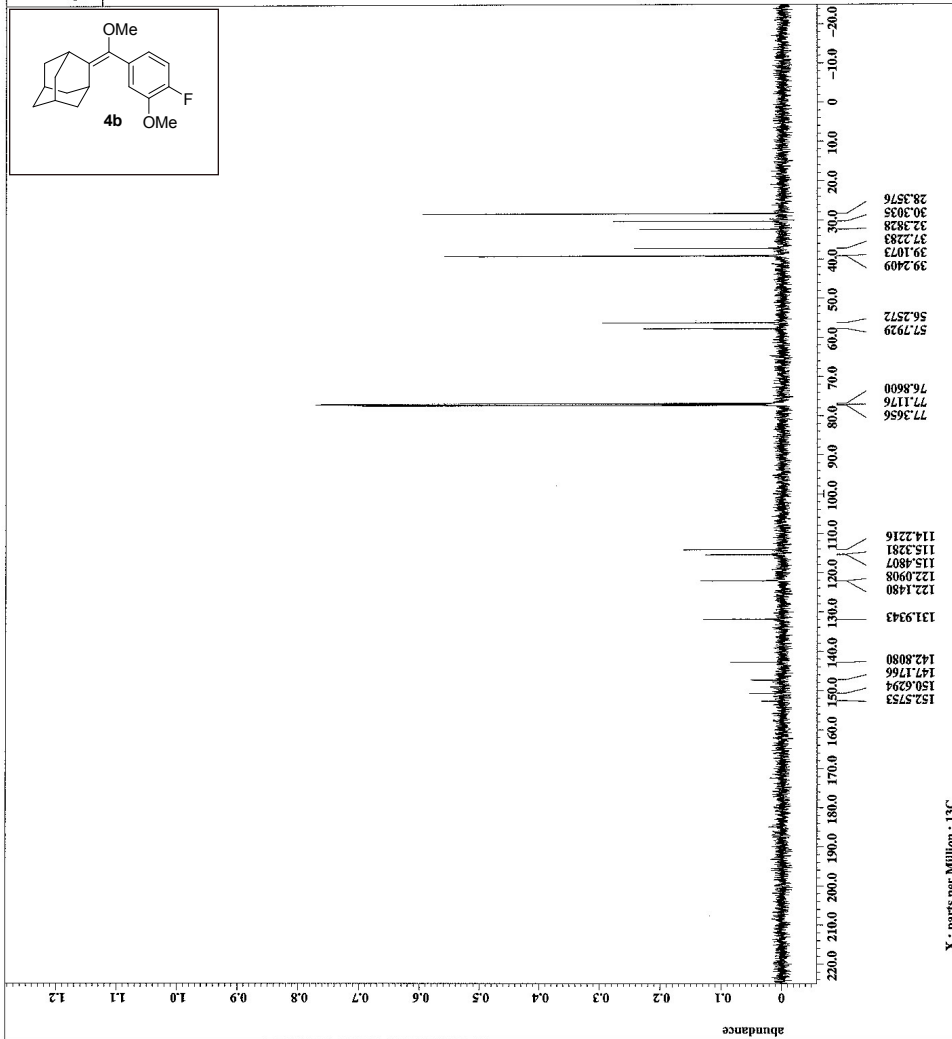

X : parts per Million : 13C

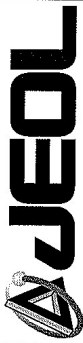

File Name = c1-cl-encl\_ether\_PROF  
Author = lippart  
Experiment = single\_pulse.ex2  
Date\_Exp = 17-JUL-2014 18:08:48  
Date\_Rec = 17-JUL-2014 18:08:48  
Software = ORCA 5.00  
Creation\_time = 8-OCT-2014 19:22:26  
Revision\_time = 8-OCT-2014 19:22:26  
Current\_time = 8-OCT-2014 19:22:34  
Data\_format = 1D COMPLEX  
Dir\_size = 13107  
Dir\_title =  
Dir\_path =  
Dimensions = X  
Site = ECA 500  
Spectrometer = DELTA2\_DMR  
Field\_strength = 11.747379 [T] (500 [MHz])  
X\_acq\_duration = 1.74587904 [s]  
X\_domain =  
X\_offset = 0.15891521 [ppm]  
X\_points = 16384  
X\_prescans = 1  
X\_resolution = 0.3627757 [Hz]  
X\_ref\_domain =  
X\_ref\_freq = 500.15591521 [MHz]  
X1\_offset = 5.0 [ppm]  
X1\_freq = 500.15591521 [MHz]  
X2\_offset = 5.0 [ppm]  
X2\_freq = 500.15591521 [MHz]  
No\_of\_psd =  
No\_of\_return =  
Scans = 16  
Total\_scans = 16  
X\_90\_width = 15.5 [us]  
X\_acq\_time = 1.74587904 [s]  
X\_angle = 45 [deg]  
X\_tau = 5 [us]  
X\_tau2 = 5 [us]  
X1\_mode = Off [us]  
X2\_mode = Off [us]  
Data\_preset = FULSE  
Data\_resolution = 4 [ppm]  
Recvr\_gain = 44  
Relaxation\_delay = 4 [s]  
Repetition\_time = 5.74587904 [s]  
Temp\_get = 21.6 [C]

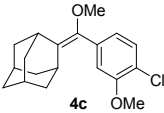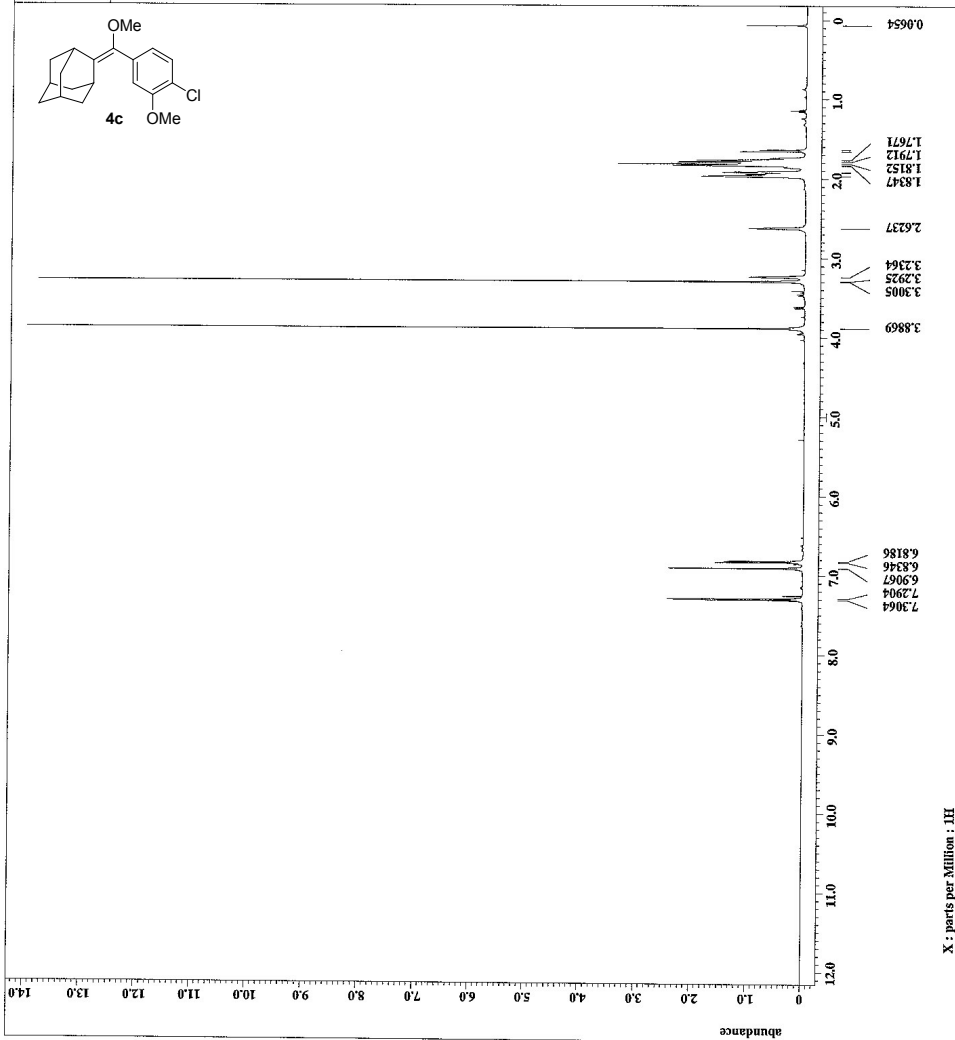

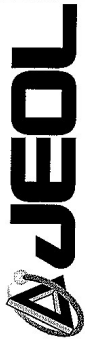

Filename = Cl-encol\_ether\_CARB  
Author = Ljppat  
Experiment = single\_pulse\_dec  
Sample\_id = Cl-encol\_ether  
Date\_ime = 17-JUL-2014 18:22:47  
Creation\_time = 17-JUL-2014 18:15:24  
Revision\_time = 17-JUL-2014 18:22:47  
Current\_time = 17-JUL-2014 18:22:57  
Data\_format = 1D COMPLEX  
Dir\_size = 26214  
Dir\_title = 13C  
Dir\_path = X (ppm)  
Dimensions = X  
Site = ECA 500  
Spectrometer = DELTA2\_NMR  
Field\_strength = 11.745379 [G] (500 [MH  
X\_acq\_duration = 0.83361792 [s]  
X\_domain = 13C  
X\_freq = 125.76529768 [MHz]  
X\_offset = 327.68  
X\_points = 4  
X\_prescans = 4  
X\_resolution = 1.19959034 [Hz]  
X\_resolution\_min = 1.19959034 [Hz]  
X\_resolution\_max = 1.19959034 [Hz]  
X\_resolution\_min\_max = 1.19959034 [Hz]  
Irr\_domain = 1H  
Irr\_freq = 500.15991521 [MHz]  
Irr\_offset = 5.0 [Dppm]  
Irr\_pulse = 1HUSH  
Irr\_return = 1  
Irr\_wait = 1  
Total\_scans = 70  
X\_90\_width = 14.28 [us]  
X\_acq\_time = 0.83361792 [s]  
X\_angle = 30 [deg]  
X\_delay = 4.7 [us]  
X\_pulse = 4.7 [us]  
Irr\_atn\_dec = 23 [dB]  
Irr\_atn\_poc = 23 [dB]  
Irr\_atn\_poc\_min = 23 [dB]  
Irr\_atn\_poc\_max = 23 [dB]  
Decouplng = WALTZ  
Initial\_wait = 1 [s]  
None\_time = TRUE  
None\_time\_min = 3 [s]  
None\_time\_max = 3 [s]  
Relaxation\_delay = 2 [s]  
Repetition\_time = 2.83361792 [s]  
Temp\_get = 22.2 [GC]

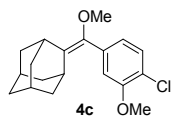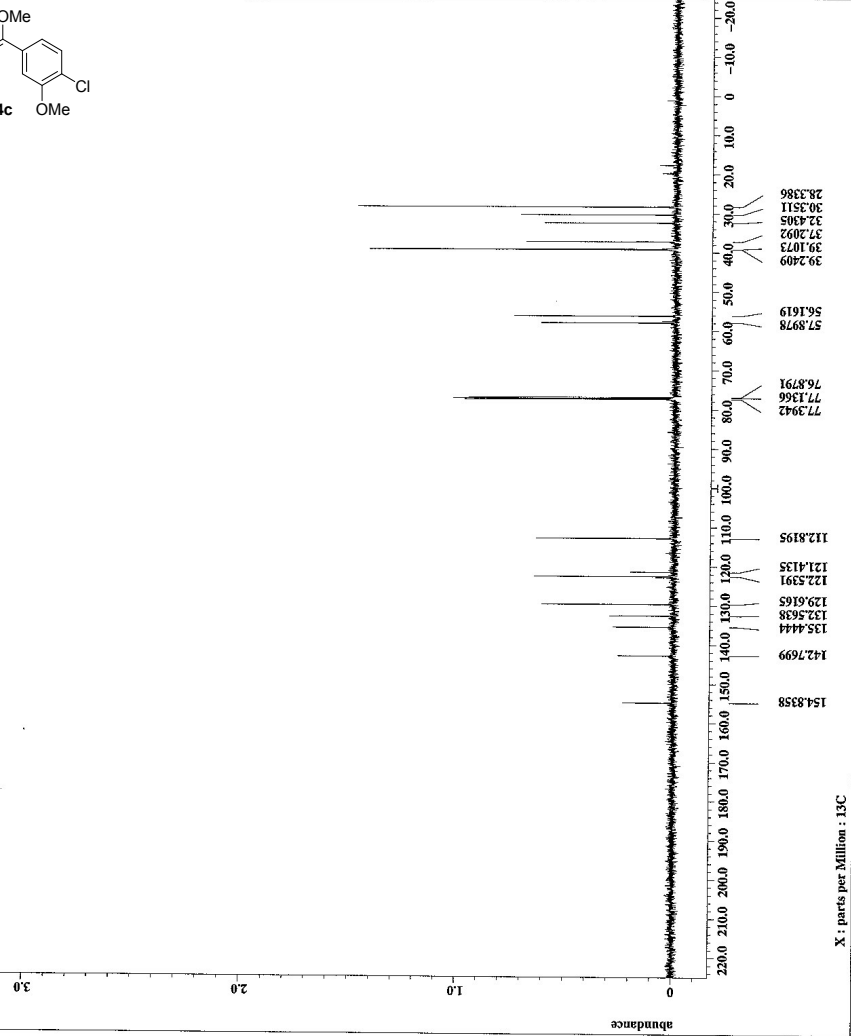

X : parts per Million : 13C

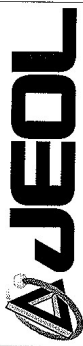

File Name = CJ-CRS-1\_PHEMOL\_PHOTO  
Author = Lippert  
Experiment = single\_pulse.es2  
Sample\_ID = CJ-CRS-1\_PHEMOL  
Solvent = CDCl3  
Creation\_time = 28-AUG-2014 13:46:43  
Revision\_time = 8-OCT-2014 19:25:36  
Current\_time = 8-OCT-2014 19:26:02

Data Format = 1D COMPLEX  
Dim\_size = 13107  
Dim\_unit = 1H  
Dim\_pos = (ppm)  
Dimensions = X  
Site = ECA 500  
Spectrometer = DELTA1\_MMR

Field\_strength = 11.7473579 [T] (500 [MHz])  
X\_acq\_duration = 1.74587904 [s]  
X\_domain = 1H  
X\_freq = 500.15991521 [MHz]  
X\_offset = 0.15991521 [MHz]  
X\_points = 16384  
X\_prescans = 1  
X\_resolution = 1.87027747 [Hz]  
X\_resolution\_ppm = 9.30438493 [ppm]  
X\_solid\_angle = 1H  
Irr\_domain = 1H  
Irr\_freq = 500.15991521 [MHz]  
Irr\_offset = 0.15991521 [MHz]  
Tri\_offset = 5.0 [ppm]  
Tri\_freq = 500.15991521 [MHz]  
Tri\_offset\_ppm = 5.0 [ppm]  
Tri\_offset\_ppm = 5.0 [ppm]  
Clipped = FALSE  
Msdet = FALSE  
Msdet\_return = FALSE  
Scans = 16  
Total\_scans = 16

X\_90\_width = 15.5 [us]  
X\_acq\_time = 1.74587904 [s]  
X\_angle = 45 [deg]  
X\_db = 6 [dB]  
X\_gain = 1.0 [us]  
Irr\_mode = Off  
Tri\_mode = Off  
Date\_preat = FALSE  
Date\_post = FALSE  
Relaxation\_delay = 3.0 [s]  
Recovery\_time = 3.0 [s]  
Relaxation\_delay = 4 [s]  
Repetition\_time = 5.74587904 [s]  
Temp\_set = 20.4 [C]

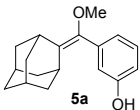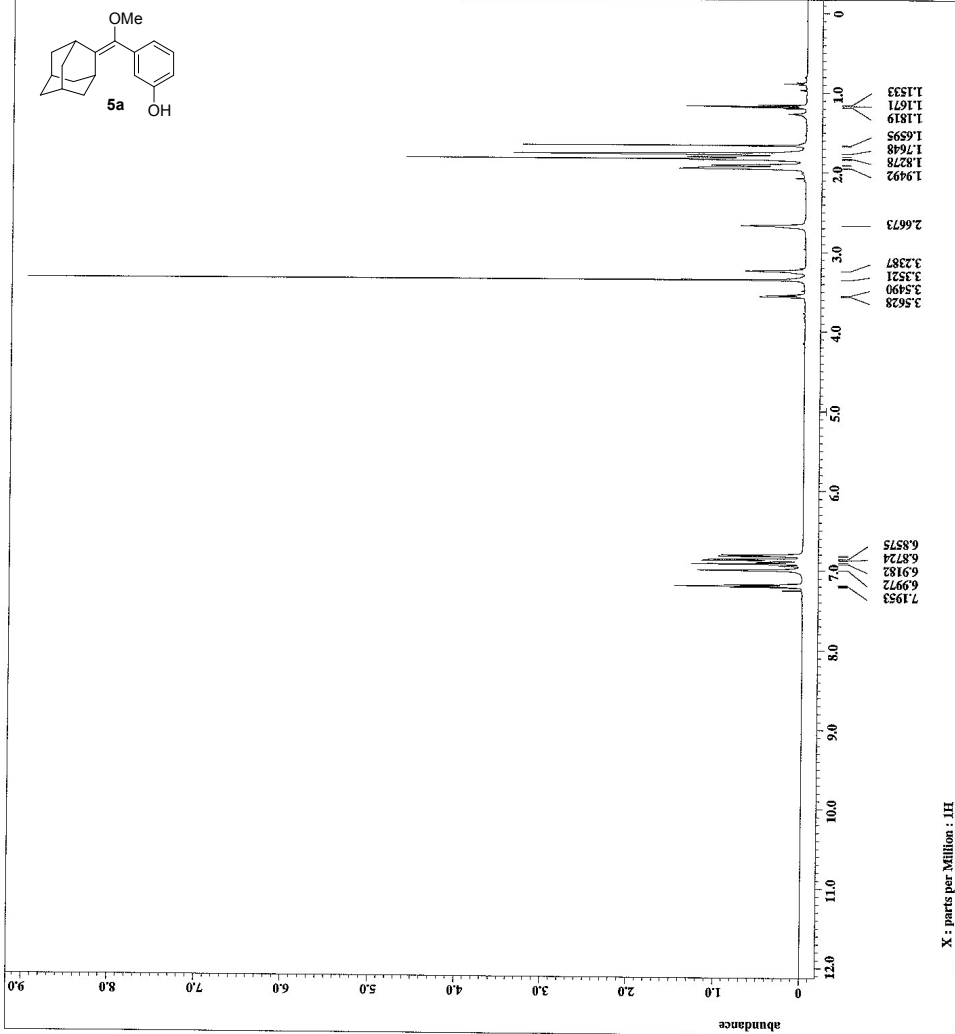

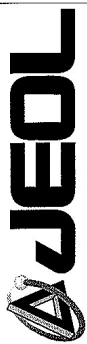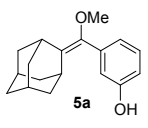

```

FileNames = c:\CHS-1-PHENOL_CARBO
Author = kippert
Experiment = CHS-1-13C
Sample ID = CHS-1-PHENOL
Solvent = CHLOROFORM-D
Creation time = 8-SEP-2014 17:49:43
Revision time = 8-OCT-2014 12:44:10
Current time = 10-OCT-2014 12:44:10

Data format = 1D COMETEX
Dir_pile = 49214
Dir_pile = 49214
Dir_pile = 49214
Dir_units = [ppm]
Dimensions = X
Site = ECA 500
Spectrometer = DEPTAQ_NMR

Field strength = 11.7473579 [T] (500 MHz)
X_acq_duration = 0.8336172 [s]
X_center = 125.76529768 [MHz]
X_freq = 125.76529768 [MHz]
X_offset = 32768
X_points = 32768
X_resolution = 1.19858034 [Hz]
X_sweep = 39.3081761 [kHz]
Irr_domain = HR
Irr_freq = 50.15991521 [MHz]
Irr_power = 5.0 [dBm]
Clipped = FALSE
Mod_return = 1
Total_scans = 184

X_90_width = 14.28 [us]
X_acq_time = 19381792 [s]
X_gate = 9 [dB]
X_p1 = 9 [dB]
X_p2 = 9 [dB]
X_pulse = 4.76 [us]
Irr_atn_dec = 23 [dB]
Irr_atn_off = 23 [dB]
Irr_noise = WALTZ
Decoupling = TRUE
Initial_wait = 1 [s]
No. scans = 184
No. time = 2 [s]
Recvr_gain = 58
Relaxation_delay = 2 [s]
Relaxation_time = 19381792 [s]
Temp_set = 21.2 [dC]
  
```

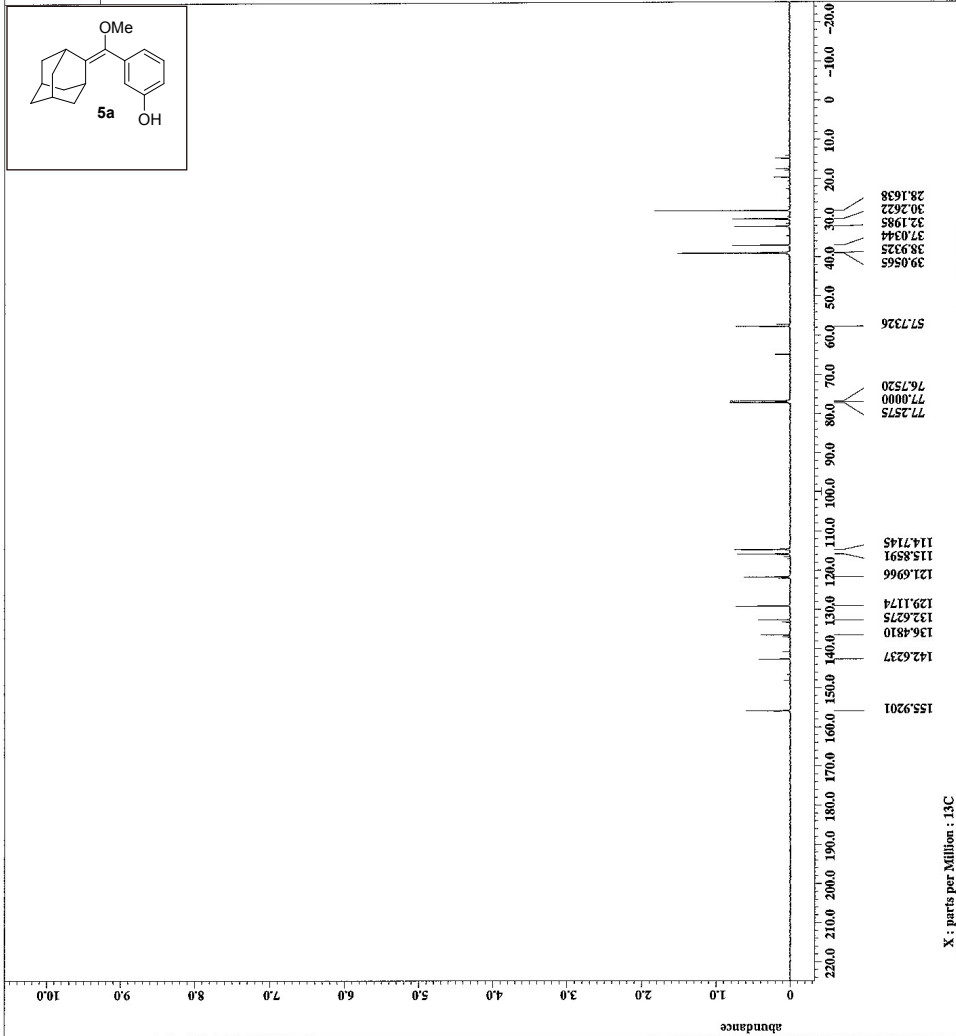

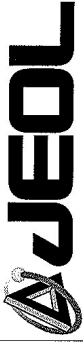

File Name = C:\F-phenol\_PROTON-73  
Author = Lippert  
Experiment = single\_pulse.exe  
Sample = 5b  
Solvent = CHLOROFORM-D  
Creation\_time = 28-JUL-2014 17:07:55  
Revision\_time = 8-OCT-2014 19:27:08  
Current\_name = 8-OCT-2014 19:27:22

Data\_format = 1D COMPLEX  
Data\_size = 13107  
F2 = 1H  
F1 = 13C  
Dimensions = X  
Site = ECA 500  
Spectrometer = DELTA\_NMR

Field\_strength = 11.7473579 [T] (500 [MHZ])  
X\_acq\_duration = 1.74587904 [s]  
X\_domain = 1H 45891521 [MHz]  
X\_offset = 5.0 [ppm]  
X\_points = 16384

X\_prescan = 1 5727737 [Hz]  
X\_resolution = 9.35438438 [MHz]  
X\_sweep = 1H 45891521 [MHz]  
Irr\_domain = 500.15991521 [MHz]  
Irr\_freq = 1H 45891521 [MHz]  
Tri\_domain = 1H 45891521 [MHz]  
Tri\_freq = 500.15991521 [MHz]  
Tri\_offset = 5.0 [ppm]  
Mod\_return = 1  
Mod\_start = 1  
Mod\_end = 1  
Mod\_return = 1  
Scans = 16  
Total\_scans = 16

X\_90\_width = 15.5 [us]  
X\_acq\_time = 1.74587904 [s]  
X\_angle = 45 [deg]  
X\_delay = 7.75 [us]  
X\_pulse = 7.75 [us]  
Irr\_mode = Off  
Tri\_mode = Off  
Mod\_start = FALSE  
Mod\_end = FALSE  
Recvr\_gain = 50  
Relaxation\_delay = 4 [s]  
Repetition\_time = 5.74587904 [s]  
Temp\_set = 22.7 [C]

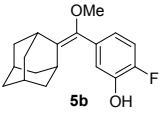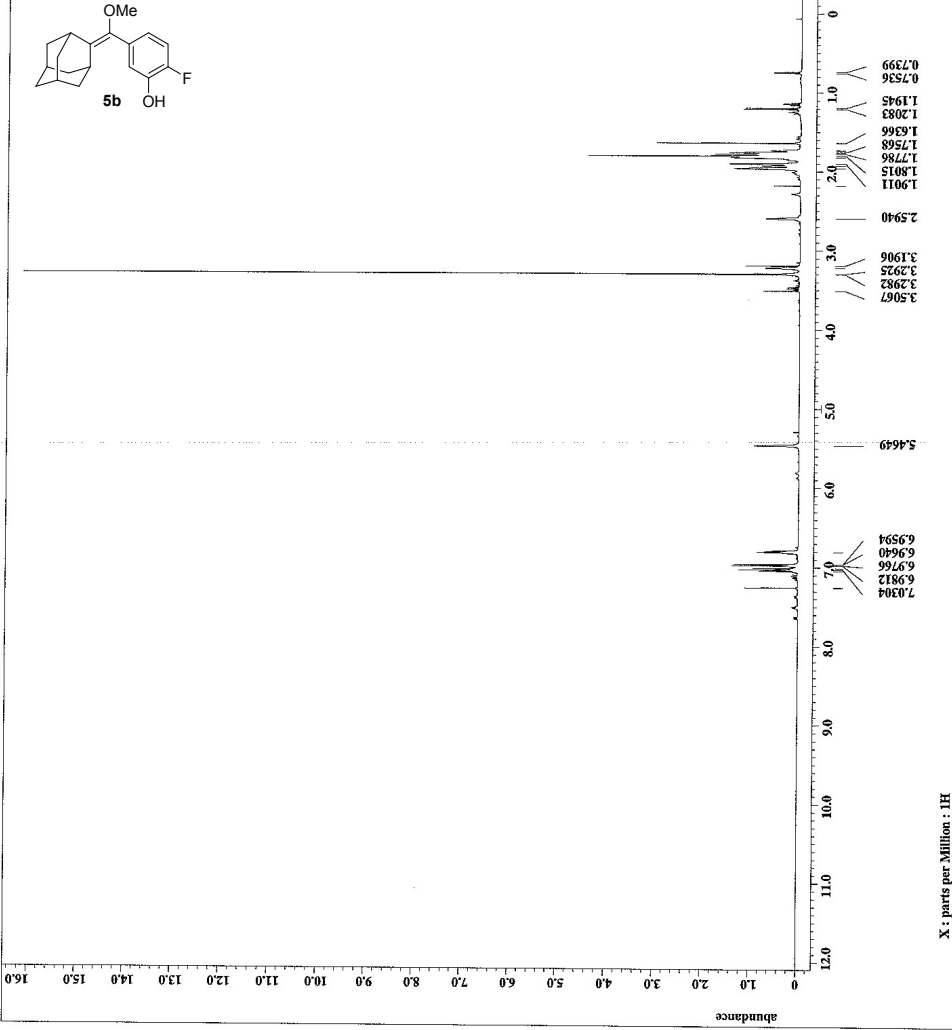

X : parts per Million : 1H

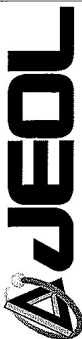

```

File Name = c:\F-phenol_CARBON-13
Author = Zippert
Experiment = single_pulse_dec
Pulse Program = zgpg30
Solvent = CDCl3
Creation Time = 26-JUN-2014 10:24:07
Revision Time = 10-OCT-2014 12:44:07
Current Time = 10-OCT-2014 12:44:22

Date Format = DD-MMM-YY
Date_1 = 26214
Date_2 = 13C
Date_3 = 100
Dimensions = X
Site = ECA 500
Spectrometer = DELTA2_MMR

Field Strength = 11.747379 [T] (500 [MHz])
X_acq_duration = 0.83361792 [s]
X_domain = 13C
X_offset = 16829768 [MHz]
X_points = 32788
X_prescans = 4
X_resolution = 4.1858034 [Hz]
X_resolution_hz = 30.1081761 [MHz]
X_resolution_ppm = 1E
Irr_freq = 500.15991521 [MHz]
Irr_offset = 0 [ppm]
Mod_return = 1
Scans = 62
Total_scans = 62
X_90_width = 14.28 [us]
X_acq_time = 0.83361792 [s]
X_delay = 9 [ms]
X_angle = 90 [deg]
X_pulse = 4.76 [us]
Irr_atn_dec = 23 [dB]
Irr_atn_poc = 23 [dB]
Sweep = 100 [Hz]
Decoupling = WURZ
Initial_wait = 1 [s]
Noe_time = 10 [s]
Recvr_gain = 58
Relaxation_delay = 2 [s]
Repetition_time = 2.83361792 [s]
Temp_set = 20.3 [C]

```

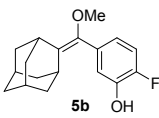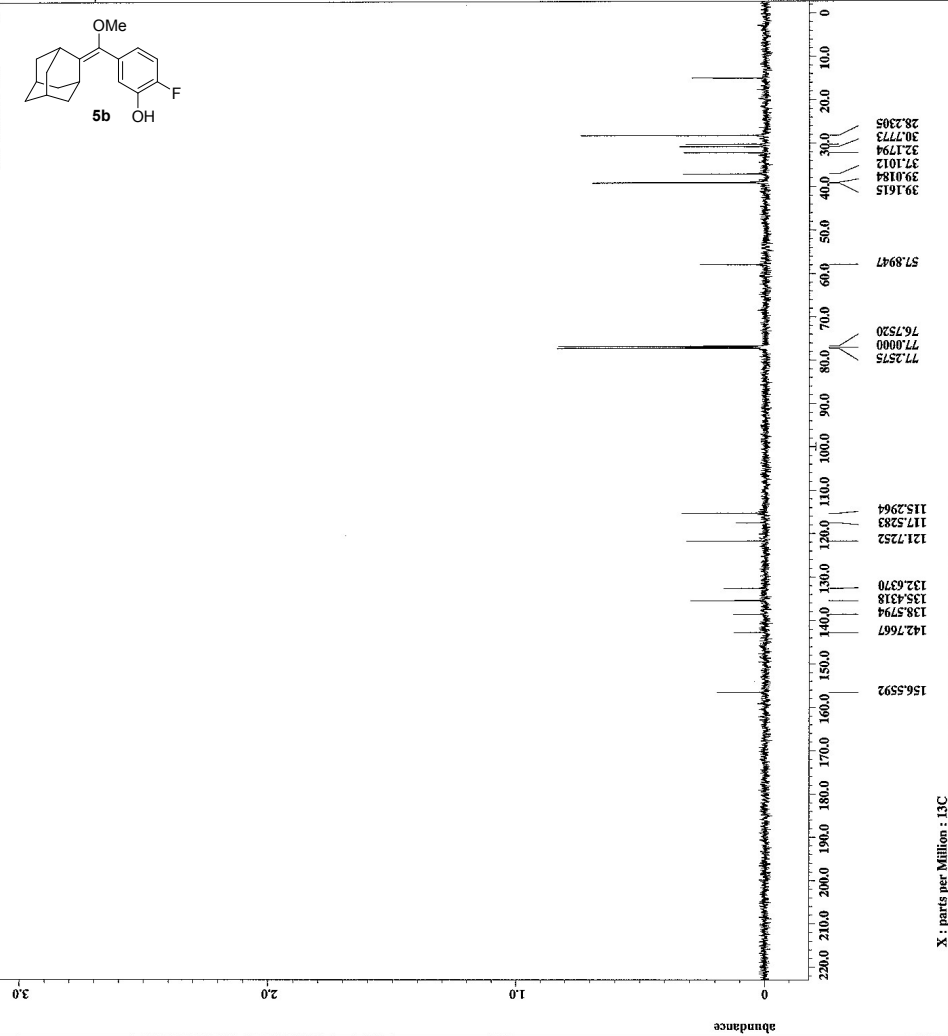



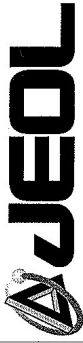

Filename = cf-cl-phenol\_PROTON-2  
Author = kippert  
Experiment = single\_pulse.exe  
Date\_Exp = 23-JUL-2014 17:39:59  
Solvent = CHLOROFORM-D  
Revision\_time = 8-OCT-2014 19:28:02  
Current\_time = 8-OCT-2014 19:28:09  
Comment = 2  
Data\_format = 1D\_COMPLEX  
Dir\_name = 3107  
Dir\_title = [empty]  
Dim\_units = X  
Site = ECA 500  
Spectrometer = BMZAB1\_NMR  
Field\_strength = 11.747379 [T] (500 MHz)  
X\_acq\_duration = 1.74487904 [s]  
X\_cycles = 500  
X\_freq = 500.15891521 [MHz]  
X\_offset = 1.6384  
X\_points = 0  
X\_resolution = 0.57277737 [Hz]  
X\_sweep = 9.38438438 [kHz]  
Irr\_gamma = 1H  
Irr\_gamma\_freq = 500.15891521 [MHz]  
Irr\_offset = 5.0 [ppm]  
Tri\_gamma = 1H  
Tri\_gamma\_freq = 500.15891521 [MHz]  
Tri\_offset = 5.0 [ppm]  
Clipping = FALSE  
Mod\_return = 1  
Scans = 16  
Total\_scans = 16  
X\_90\_width = 15.5 [usec]  
X\_acq\_time = 1.74487904 [s]  
X\_angle = 45 [deg]  
X\_pulse = 7.75 [usec]  
Irr\_mode = OFF  
Tri\_mode = OFF  
Initial\_wait = 1 [s]  
Recvr\_gain = 40  
Relaxation\_delay = 4 [s]  
Relaxation\_delay\_on\_chan = 22.7 [sec]  
Temp\_get =

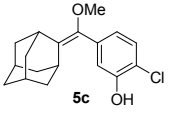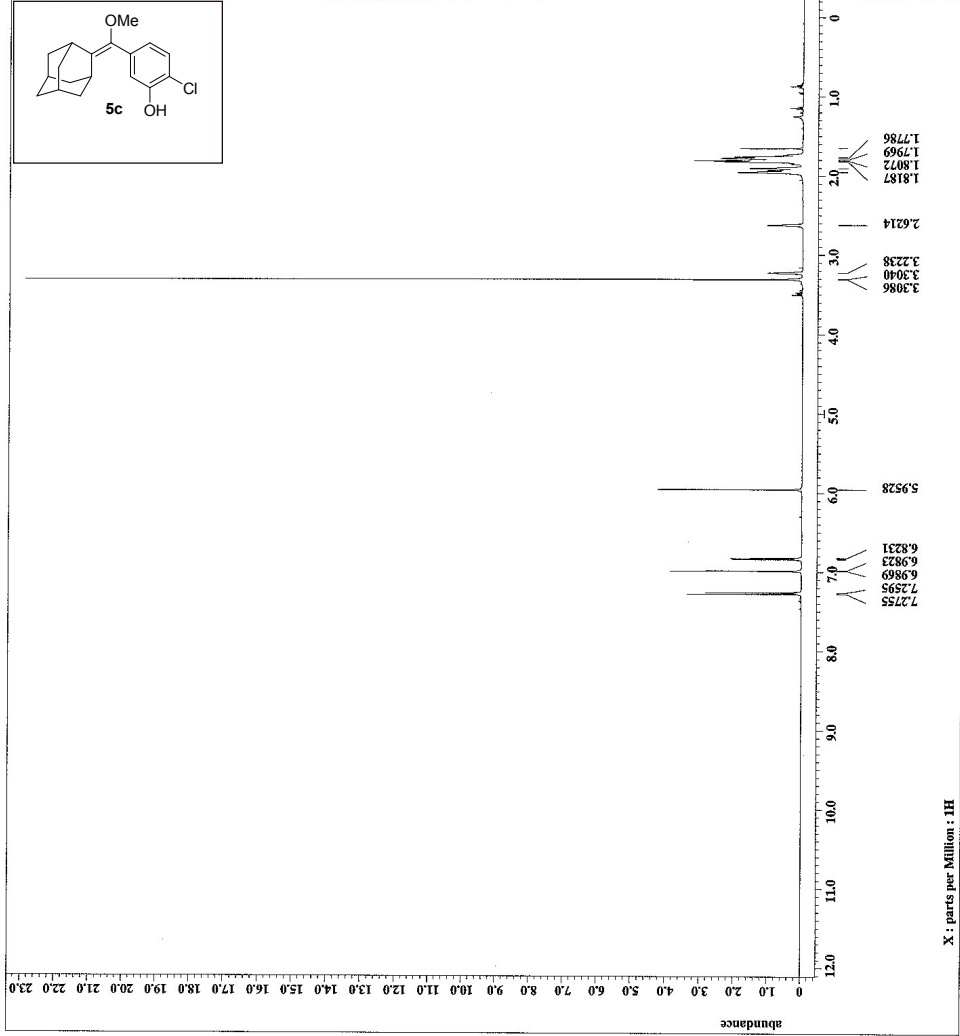

X : parts per Million : 1H

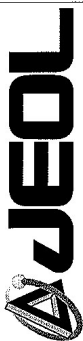

```

Filename = c:\-Cl-phenol-CARBON-2
Author = kippert
Experiment = single_pulse_dec
Date_ = 2014
Solvent = CDCl3
Pulse_Program = GZROGPOBMD
Revision_time = 23-JUL-2014 17:43:16
Revision_time = 10-Oct-2014 13:42:21
Current_time = 10-Oct-2014 12:42:16
Comment = 2
Data_format = ID COMPLEX
Dim_units = [ppm]
Dimensions = X
Site = ECA 500
Spectrometer = SHMAD_NMR
Field_strength = 11.747379 [T] (500 MHz)
X_acq_duration = 0.8336172 [s]
X_center = 125.76523768 [MHz]
X_offset = 100 [ppm]
X_points = 32768
X_resolution = 1.19959034 [Hz]
X_sweep = 39.3081761 [kHz]
Irr_domain = 1H
Irr_freq = 50 [ppm]
Irr_offset = FALSE
Mod_return = 1
Scans = 9
Total_scans = 33
X_90_width = 14.28 [us]
X_acq_time = 9.0336172 [s]
X_gate = 9 [dB]
X_atn = 9 [dB]
X_pulse = 4.76 [us]
Irr_atn_dec = 23 [dB]
Irr_atn_off = 0 [dB]
Irr_noise = WALTZ
Decoupling = TRUE
Initial_wait = 1 [s]
Prep_time = 2 [s]
Non_time = 2 [s]
Recvr_gain = 60
Relaxation_delay = 2 [s]
Temperature = 31.6 [C]
Temp_set = 22.9 [C]

```

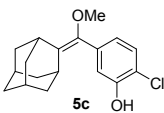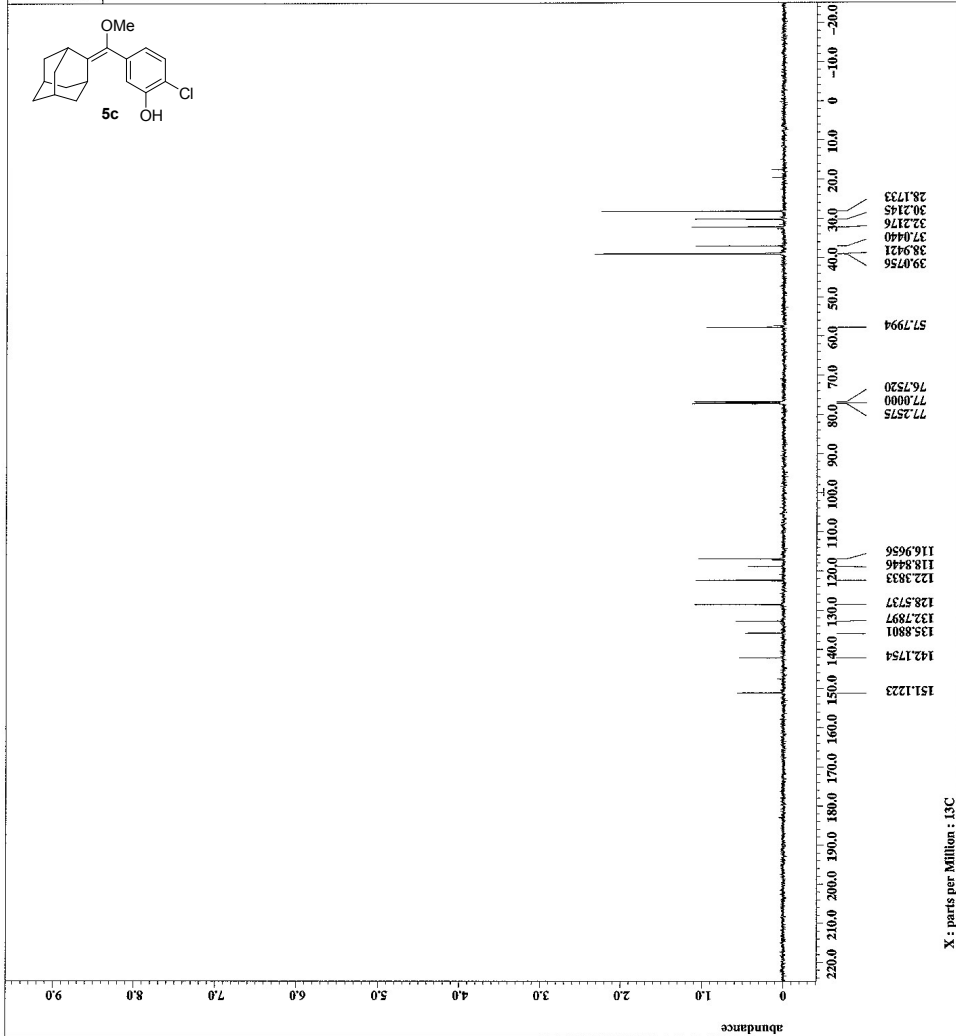

X : paris per Million : 13C



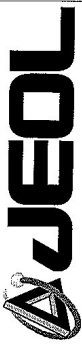

Filename = c:\180-after\_PULC\_PRO  
Author = Lippert  
Experiment = single\_pulse.es2  
Pulse\_Program = zgpg30  
Solvent = CHLOROFORM-D  
Creation\_time = 27-FEB-2014 17:15:33  
Revision\_time = 8-OCT-2014 19:31:37  
Current\_time = 8-OCT-2014 19:31:48  
Data\_format = 1D COMPLEX  
Data\_size = 13107  
F2 = 1H  
F1 = 13C  
Dimensions = [ppm]  
Site = ECA 500  
Spectrometer = DELTA2\_MMR  
Field\_strength = 11.7473579 [T] (500 [MH  
X\_acq\_duration = 1.74587904 [s]  
X\_domain = 50.15991521 [MHz]  
X\_offset = 5.0 [ppm]  
X\_points = 16384  
X\_prescan = 1.5727787 [Hz]  
X\_resolution = 9.38438438 [MHz]  
X\_sweep = 1H  
Irr\_domain = 500.15991521 [MHz]  
Irr\_freq = 50.15991521 [MHz]  
Tri\_domain = 1H  
Tri\_freq = 500.15991521 [MHz]  
Tri\_offset = 5.0 [ppm]  
Mod\_return = 1  
Acq = 1H  
Mod\_return = 1  
Total\_scans = 16  
X\_90\_width = 14.8 [us]  
X\_acq\_time = 1.74587904 [s]  
X\_angle = 45 [deg]  
X\_delay = 7.4 [us]  
X\_pulse = Off  
Irr\_mode = Off  
Tri\_mode = Off  
Modulation = 1H  
Initial\_wait = 50  
Recvr\_gain = 50  
Relaxation\_delay = 4 [s]  
Repetition\_time = 5.74587904 [s]  
Temp\_set = 20.3 [C]

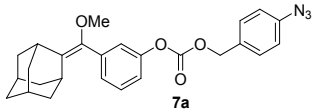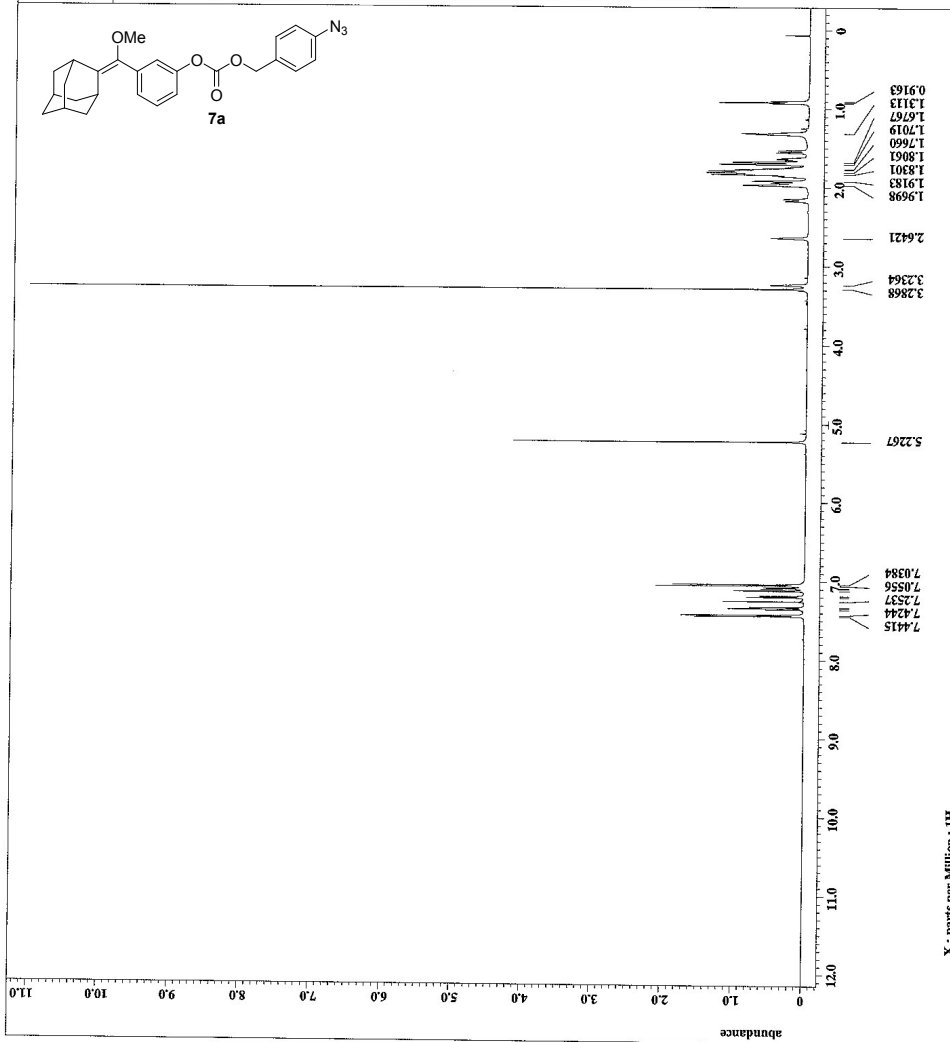

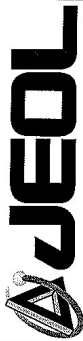

File Name = c:\procces-1\_CARBON-11  
Author = Lippert  
Experiment = single\_pulse\_dec  
Sample\_id = CJ-PROCRES-1  
SOP = 11-13-12  
Creation\_time = 30-AUG-2014 11:36:12  
Revision\_time = 30-AUG-2014 11:43:15  
Current\_time = 27-SEP-2014 15:56:50  
Comment = 8  
Data\_format = ID COMPLEX  
Dir\_size = 26214  
Dir\_units = [sec]  
Dir\_units = [ppm]  
Dimensions = X  
Site = ECA 500  
Spectrometer = DEPTAQ\_MMR  
Field\_strength = 11.747375 [T] (500 [MHZ])  
X\_acq\_duration = 0.83361792 [s]  
X\_f2\_domain = 126.76529768 [MHz]  
X\_offset = 100 [ppm]  
X\_points = 32768  
X\_prescans = 4  
X\_resolution = 1.8989034 [Hz]  
X\_sweep = 39.3081761 [MHz]  
Irr\_domain = 1H  
Irr\_freq = 500.15991521 [MHz]  
Irr\_ppm = 100 [ppm]  
Clipped = FALSE  
Mod\_return = 1  
Scans = 114.0  
Total\_scans = 114.0  
X\_90\_width = 14.28 [us]  
X\_acq\_time = 0.83361792 [s]  
X\_setup = 9 [dB]  
X\_pulse = 4.76 [us]  
Irr\_str\_dec = 23 [dB]  
Irr\_str\_dec = 23 [dB]  
Irr\_pulse = TRUE  
Decoupling = WALTZ  
Initial\_wait = 1 [s]  
Noise\_time = 2 [s]  
Recovery\_gain = 54  
Relaxation\_delay = 2 [s]  
Repetition\_time = 2.83361792 [s]  
Temp\_set = 29.8 [dC]

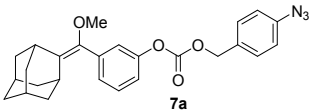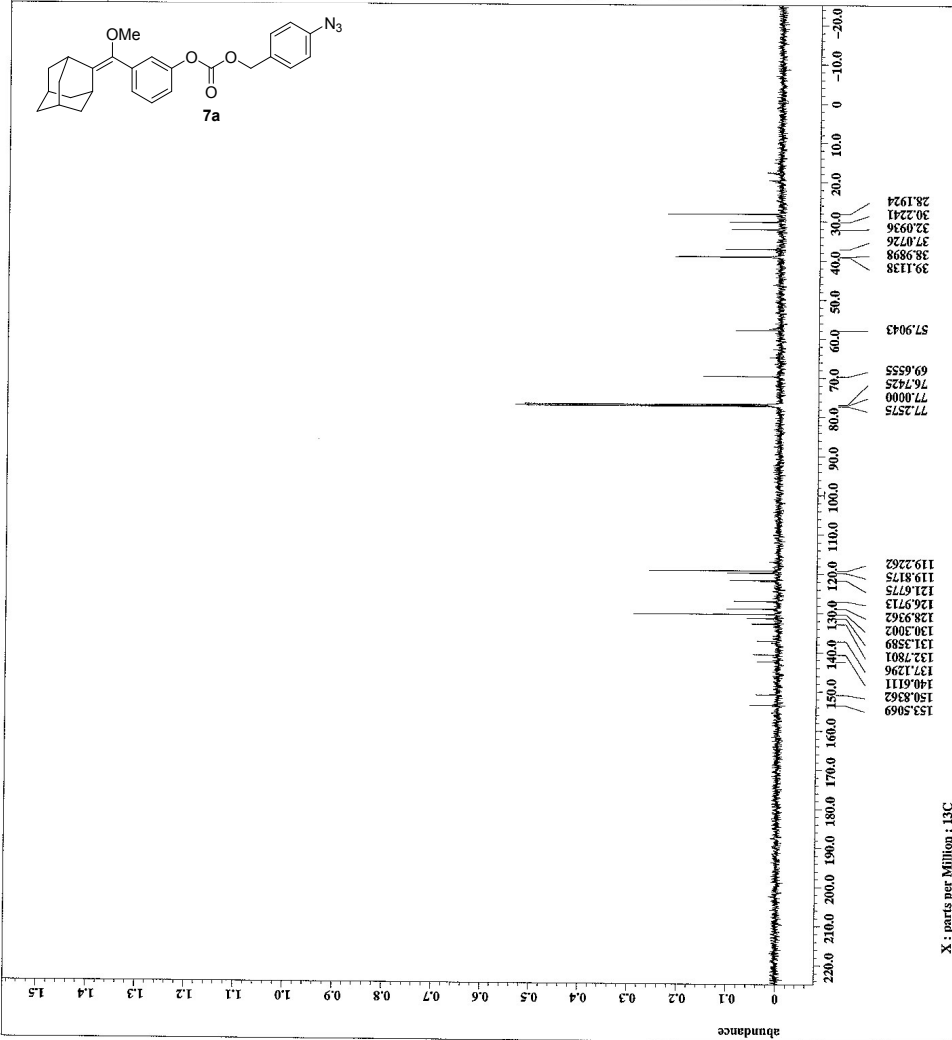

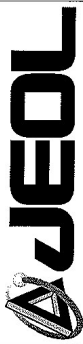

File name = c:\pro\_Cus-2\_PROTON-2  
Author = Lippert  
Experiment = single\_pulse.exe  
Date\_Exp = 25-JUL-2014 12:53:49  
Solvent = CDCl3  
Spectrum = 1D  
Creation\_time = 25-JUL-2014 12:53:49  
Revision\_time = 8-OCT-2014 19:33:44  
Current\_time = 8-OCT-2014 19:33:58

Data\_format = 1D COMPLEX  
Dir\_size = 13107  
Dir\_name = 1H  
Dir\_path = 1H  
Dimensions = X  
Site = ECA 500  
Spectrometer = DELTAJ\_NMR

Field\_strength = 11.7473579 [T] (500 MHz)  
X\_acq\_duration = 1.74887904 [s]  
X\_domain = 1H  
X\_offset = 0.15891521 [ppm]  
X\_points = 5.0 [ppm]  
X\_resolution = 16384

X\_prescans = 1  
X\_resolution = 1.5707737 [Hz]  
X\_sweep = 9.30438438 [kHz]  
Irr\_domain = 1H  
Irr\_freq = 500.15991521 [MHz]  
Irr\_offset = 0.15891521 [ppm]  
Tri\_domain = 1H  
Tri\_freq = 500.15991521 [MHz]  
Tri\_offset = 5.0 [ppm]  
Mag\_return = 1  
Pulse = 1  
Total\_scans = 16

X\_90\_width = 15.5 [us]  
X\_acq\_time = 1.74887904 [s]  
X\_angle = 45 [deg]  
X\_atn = 5 [dB]  
X\_atn2 = 5 [dB]  
Irr\_mode = Off  
Tri\_mode = Off  
Date\_preset = FALSE  
Date\_start = 20140725  
Recvr\_gain = 50  
Relaxation\_delay = 4 [s]  
Repetition\_time = 5.74887904 [s]  
Temp\_set = 20.4 [dC]

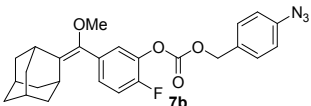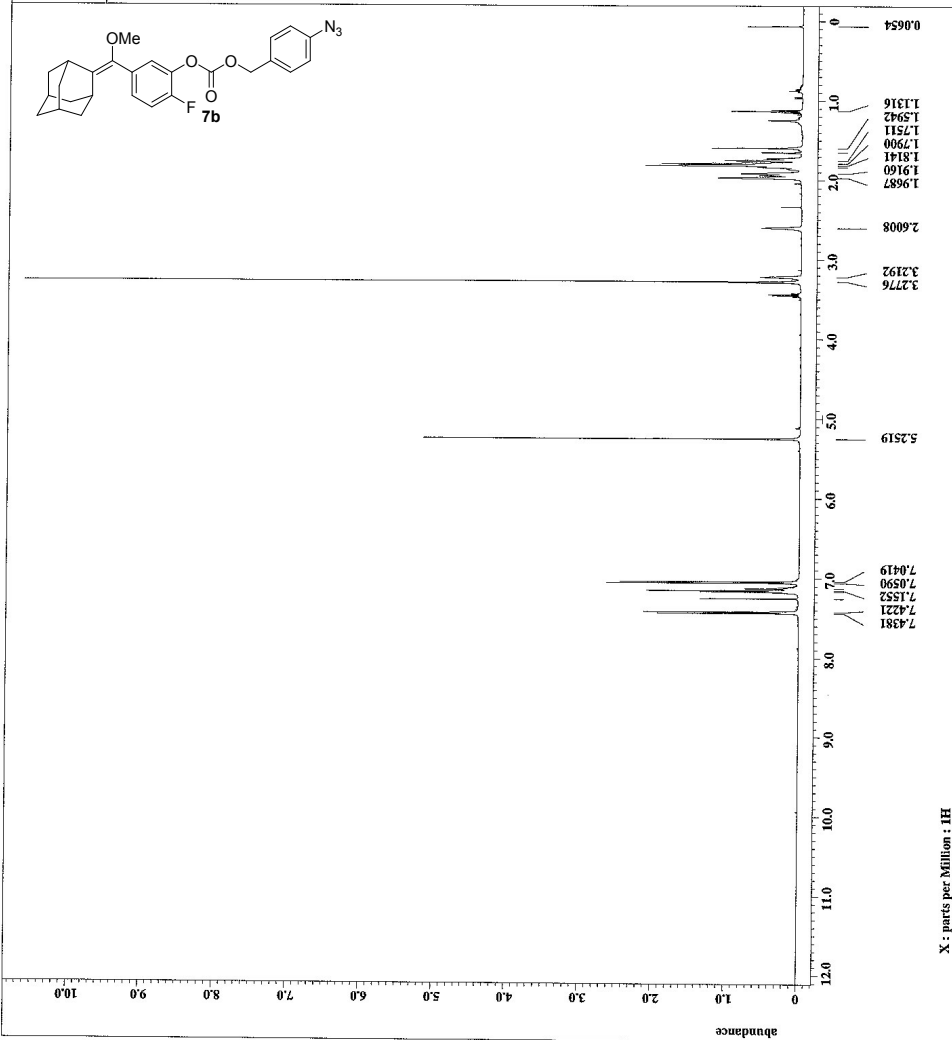

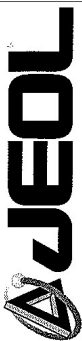

Filename = c:\pro\_CHS-2\_CARBON-8  
Author = Lippert  
Experiment = single\_pulse\_gec  
Pulse\_program = zgpg30  
Solvent = CDCl3/ROH-C-D  
Revision\_time = 25-JUL-2014 13:00:50  
Revision\_time = 9-Oct-2014 19:34:12  
Current\_time = 9-Oct-2014 19:34:29  
Data\_format = 1D\_COMPLEX  
Dim\_size = 26214  
Dim\_units = [Hz]  
Dimensions = X [ppm]  
Site = ECA 500  
Spectrometer = DEPTAI\_MOR  
Field\_strength = 11.747379 [T] (500 MHz)  
X\_acq\_duration = 0.8336172 [s]  
X\_gamma = 135  
X\_gain = 33576529768 [Hz]  
X\_offset = 400 [ppm]  
X\_points = 32768  
X\_prescans = 4  
X\_resolution = 1.985934 [Hz]  
X\_sweep = 39.3081731 [kHz]  
Irr\_gamma = 1H  
Irr\_gamma1 = 500.15991521 [MHz]  
Irr\_freq = 125.761 [MHz]  
Irr\_offset = 0 [ppm]  
Mod\_return = 1  
PALS =  
Scans = 125  
Total\_scans = 125  
X\_90\_width = 14.28 [us]  
X\_acq\_time = 0.8336172 [s]  
X\_cycles = 0 [cycles]  
X\_gain = 9 [dB]  
X\_pulprg = 4.76 [us]  
X\_pulse = 4.76 [us]  
Irr\_atn\_dec = 23 [dB]  
Irr\_atn\_acc = 23 [dB]  
Irr\_atn = 0 [dB]  
Irr\_noise = WALTZ  
Decoupling = WALTZ  
Initial\_wait = 1 [s]  
Nox\_time = 2 [min]  
Nox\_wait = 56 [s]  
Recvr\_gain = 2 [s]  
Relaxation\_delay = 2 [s]  
Repetition\_time = 2.8336172 [s]  
Temp\_sec = 21 [C]

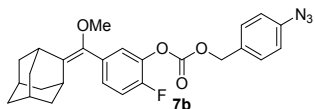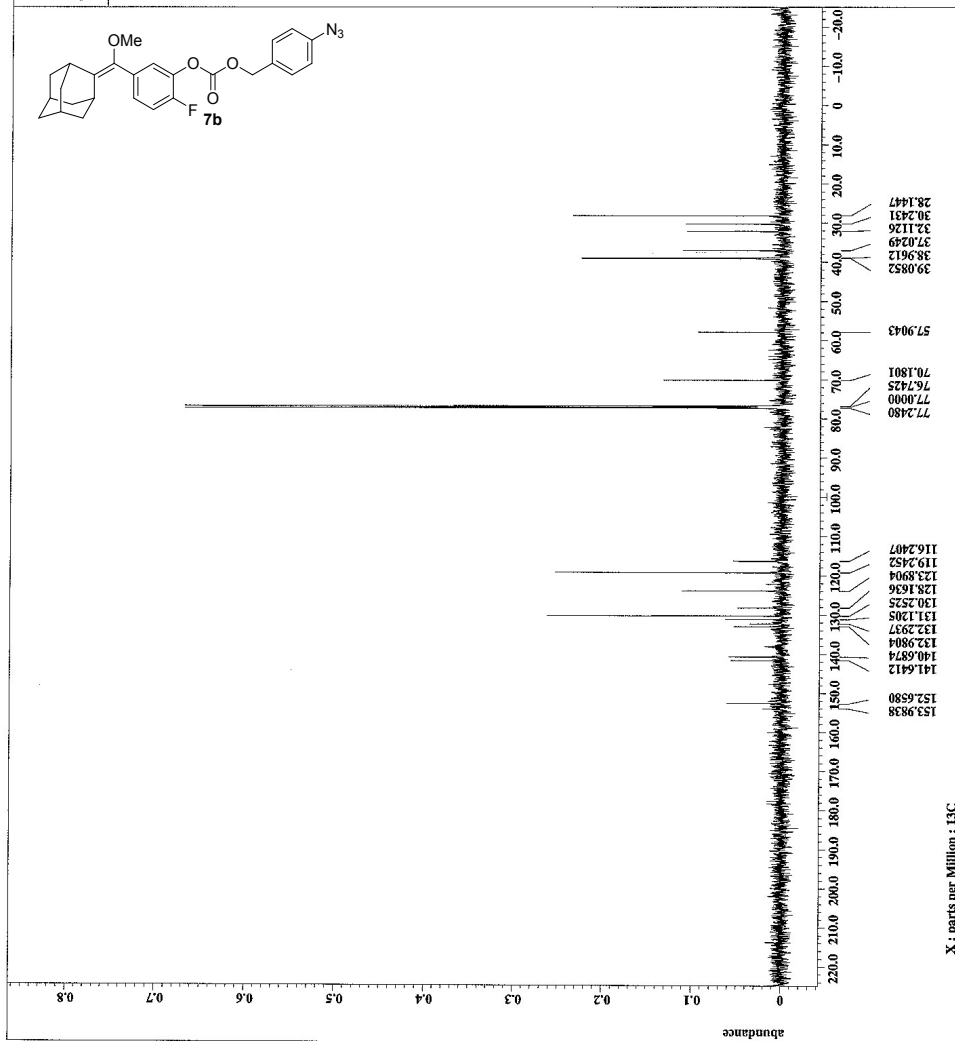

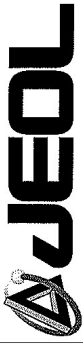

Filename = cf-proc.cl-gns-1\_PROTO  
Author = lipper  
Experiment = single\_pulse.exe  
Pulse\_Program = zgpg30-1  
Solvent = CHLOROFORM-D  
Date\_ Acquired = 21-MAY-2014 19:05:28  
Creation\_time = 8-OCT-2014 19:34:54  
Revision\_time = 8-OCT-2014 19:34:54  
Current\_time = 8-OCT-2014 19:34:58  
Data\_format = ID COMPLEX  
Dim\_size = 13107  
Incr = 1  
AQ = 1.00000000  
Dim\_units = Hz  
Dimensions = X  
Site = ECA 500  
Spectrometer = DEPTAL\_NMR  
Field\_strength = 11.747379(T) (500 MHz)  
X\_acq\_duration = 1.7487904(s)  
X\_domain = 500.15891521(MHz)  
X\_center = 500.15891521(MHz)  
X\_offset = 5.0(ppm)  
X\_points = 16384  
X\_precans = 1  
X\_resolution = 1.5727737(Hz)  
X\_sweep = 9.3843436(MHz)  
IR\_domain = HR  
IR\_freq = 500.15891521(MHz)  
IR\_offset = 5.0(ppm)  
TR1\_domain = HR  
TR1\_freq = 500.15891521(MHz)  
TR1\_offset = 5.0(ppm)  
Mod\_return = 1  
Scans = 16  
Total\_scans = 16  
X\_90\_width = 15.5[us]  
X\_acq\_time = 1.7487904(s)  
X\_angle = 45[deg]  
X\_cp = 7[us]  
X\_pulse = 7.95[us]  
IR\_mode = Off  
TR1\_mode = Off  
Prgm\_start = 1.7487904(s)  
Prgm\_end = 1.7487904(s)  
Relaxation\_delay = 4[s]  
Repetition\_time = 5.7487904(s)  
Temp\_90c = 21.1[degC]

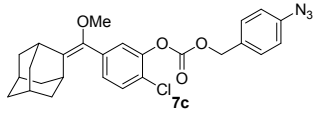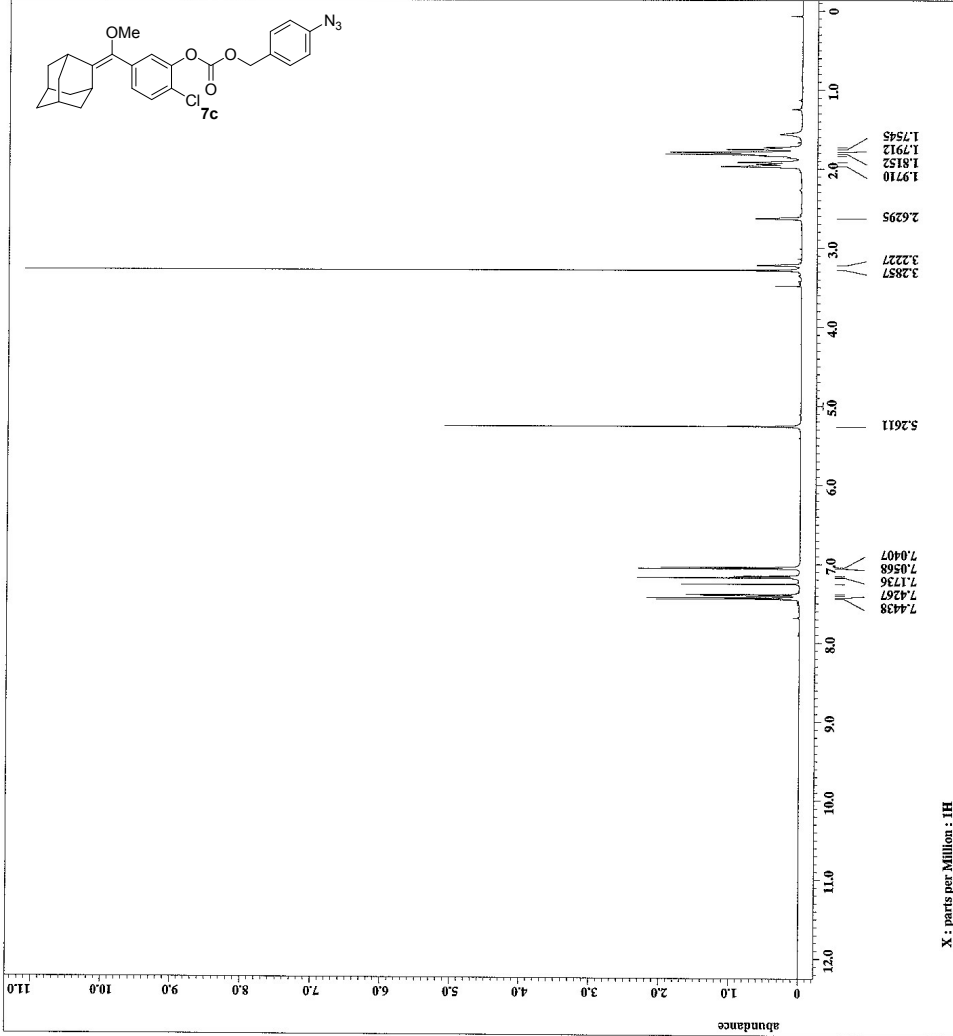



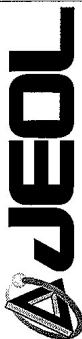

```

= c1-pro_CHS-3_CARBON-1
= Lippert
= single_pulse_dec
= CHLOROFORM-D
= CHLOROFORM-D
= 17-JUN-2014 17:01:30
= 10-OCT-2014 12:53:06
= 10-OCT-2014 12:53:13
= 1D COMPLEX
= 26214
= 13C
= X
= ECA 500
= DELTA2_MMR
= 11.747379 [s] (500 MHz)
= 0.83361792 [s]
= 100 [ppm]
= 6829788 [Hz]
= 32768
= 4
= 385894 [Hz]
= 1H
= 3081761 [Hz]
= 500.15891321 [MHz]
= 10 [ppm]
= 1
= 208
= 14.28 [us]
= 0.83361792 [s]
= 90 [deg]
= 4.76 [us]
= 23 [dB]
= 23 [dB]
= TRUE
= 1 [s]
= TRUE
= 58
= 2 [s]
= 2.83361792 [s]
= 21.6 [deg]

```

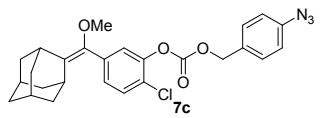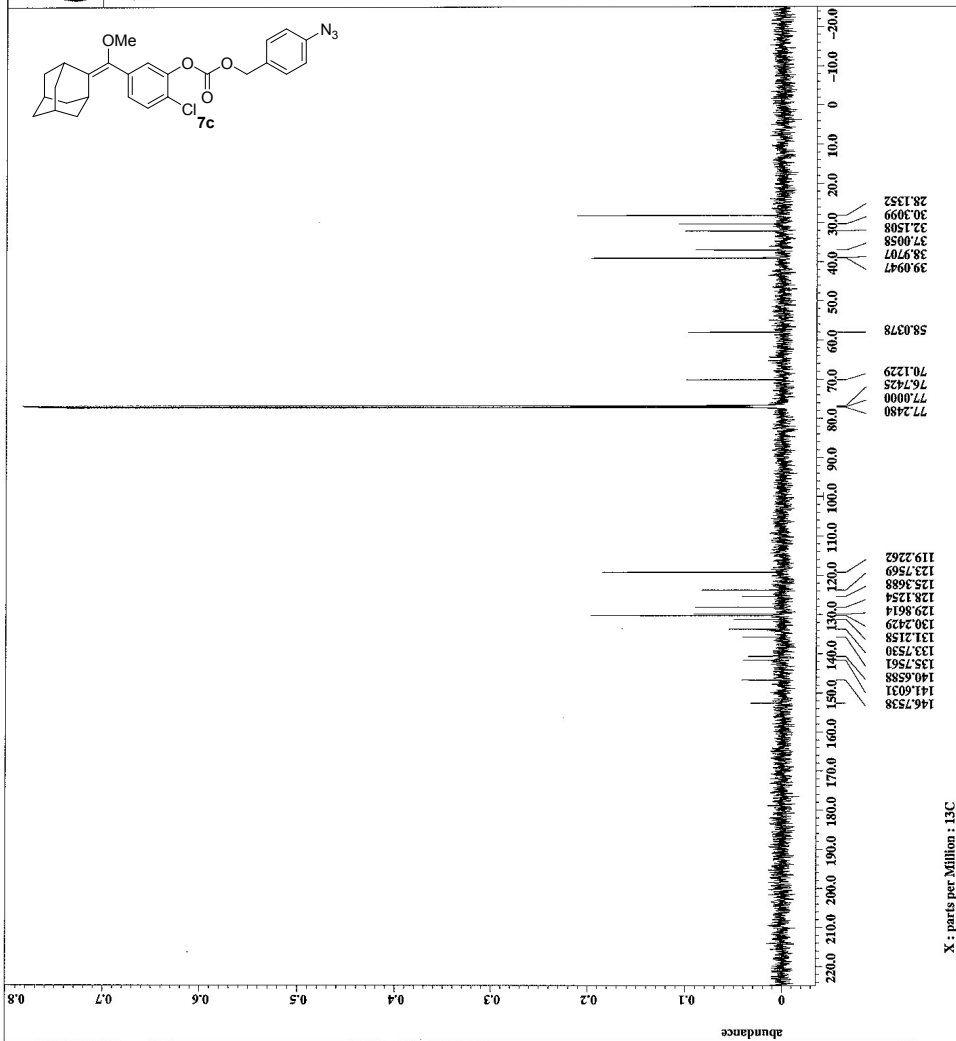

X : parts per Million : 13C

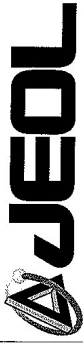

File Name = c:\CHS-1\_PROFORM-14.jd  
Author = Lippert  
Experiment = single\_pulse.exe2  
Date\_ Acq = 12-SEP-2014 15:07:24  
Solvent = CDCl3  
Spectrum = CHS-1  
Creation Time = 12-SEP-2014 15:07:24  
Revision Time = 8-OCT-2014 19:35:44  
Current Time = 8-OCT-2014 19:35:50  
Data Format = ID COMPLEX  
Dim Size = 13107  
Dim 1 = 1H  
Dim 2 = 13C  
Dim Unit = ppm  
Dimensions = X  
Site = ECA 500  
Spectrometer = DELTA2\_MMR  
Field Strength = 11.747579 [T] (500 [MHZ])  
X\_Acq Duration = 1.74587904 [s]  
X\_Domain = 1H  
X\_Freq = 500.15991521 [MHZ]  
X\_Offset = 5.0 [ppm]  
X\_Points = 16384  
X\_Prescans = 1  
X\_Resolution = 1.8707757 [Hz]  
X\_Sweep = 9.3843438 [MHz]  
IRF\_Domain = 1H  
IRF\_Freq = 500.15991521 [MHZ]  
IRF\_Offset = 5.0 [ppm]  
IRF\_Points = 3K  
IRF\_Scan = 1  
IRF\_T1\_Domain = 1H  
IRF\_T1\_Freq = 500.15991521 [MHZ]  
IRF\_T1\_Offset = 5.0 [ppm]  
IRF\_T1\_Points = 2K  
IRF\_T1\_Scan = 1  
Mod Return = FALSE  
Pulse Program = zgpg30  
Scans = 16  
Total Scans = 16  
X\_90\_Width = 15.5 [us]  
X\_Acq Time = 1.74587904 [s]  
X\_Angle = 45 [deg]  
X\_Decoupling = 0 [dB]  
X\_Delay = 1.00 [s]  
IRF\_Mode = Off [us]  
IRF\_Prescans = Off  
Data Preset = FALSE  
Date Acq = 12-SEP-2014 15:07:24  
Recvr Gain = 50  
Relaxation Delay = 4 [s]  
Repetition Time = 5.74587904 [s]  
Temp Set = 20.3 [degC]

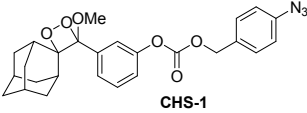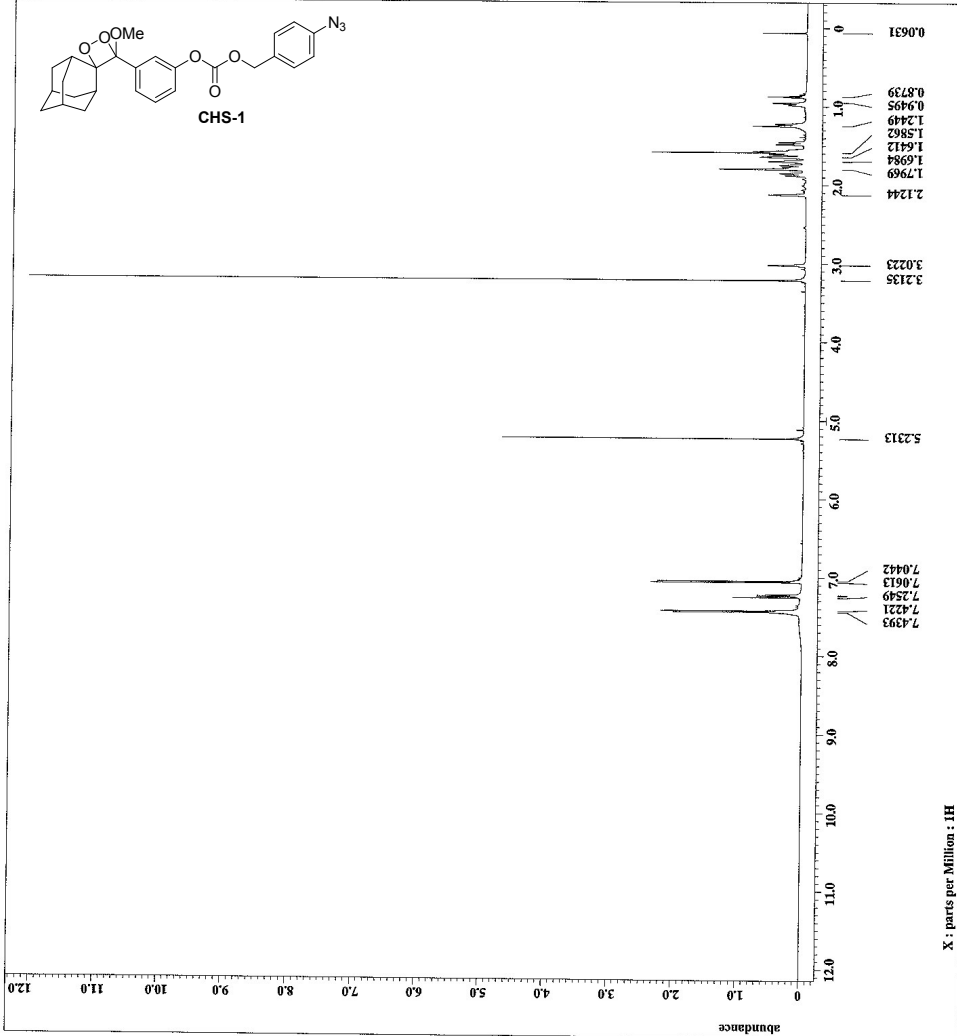

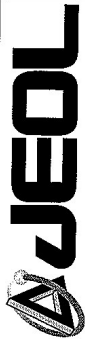

```

Filename = CJ-CHS-1_CARBON-7.jdf
Author = Lippest
Experiment = single_pulse_dec
SampleId = CJ-CHS-1
SampleNo = 0
Creation_time = 12-SEP-2014 15:31:04
Revision_time = 12-SEP-2014 15:39:34
Current_time = 12-SEP-2014 15:39:50
Data_format = 1D COMPLEX
Dia_size = 26214
Dia_title = 13C
Dimensions = XPPM
Site = ECA 500
Spectrometer = DELTA2_MMR
Field_strength = 11.747379 [M] (500 [MHZ])
X_acq_duration = 0.83361792 [s]
X_domain = 13C
X_freq = 125.76529768 [MHz]
X_offset = 32748
X_points = 4
X_prescans = 1
X_resolution = 1.19959034 [Hz]
X_sweep = 18
X_swept_freq = 500.15951521 [MHz]
Irr_freq = 500.15951521 [MHz]
Irr_offset = 5.0 [ppm]
X_swept_freq = 1
Mod_return = 486
Total_scans = 486
X_90_width = 14.28 [usc]
X_acq_time = 0.83361792 [s]
X_angle = 30 [deg]
X_swept_freq = 4.97 [MHz]
X_pulse = 4 [usc]
Irr_atn_dec = 23 [dB]
Irr_atn_poc = 23 [dB]
WALZ = TRUE
Decouple = 1 [s]
Initial_wait = 1 [s]
Noe = TRUE
Noe_time = 2 [s]
Noe_delay = 1 [s]
Relaxation_delay = 2 [s]
Relaxation_time = 2.83361792 [s]
temp_get = 21.6 [degC]

```

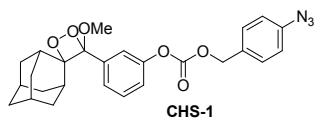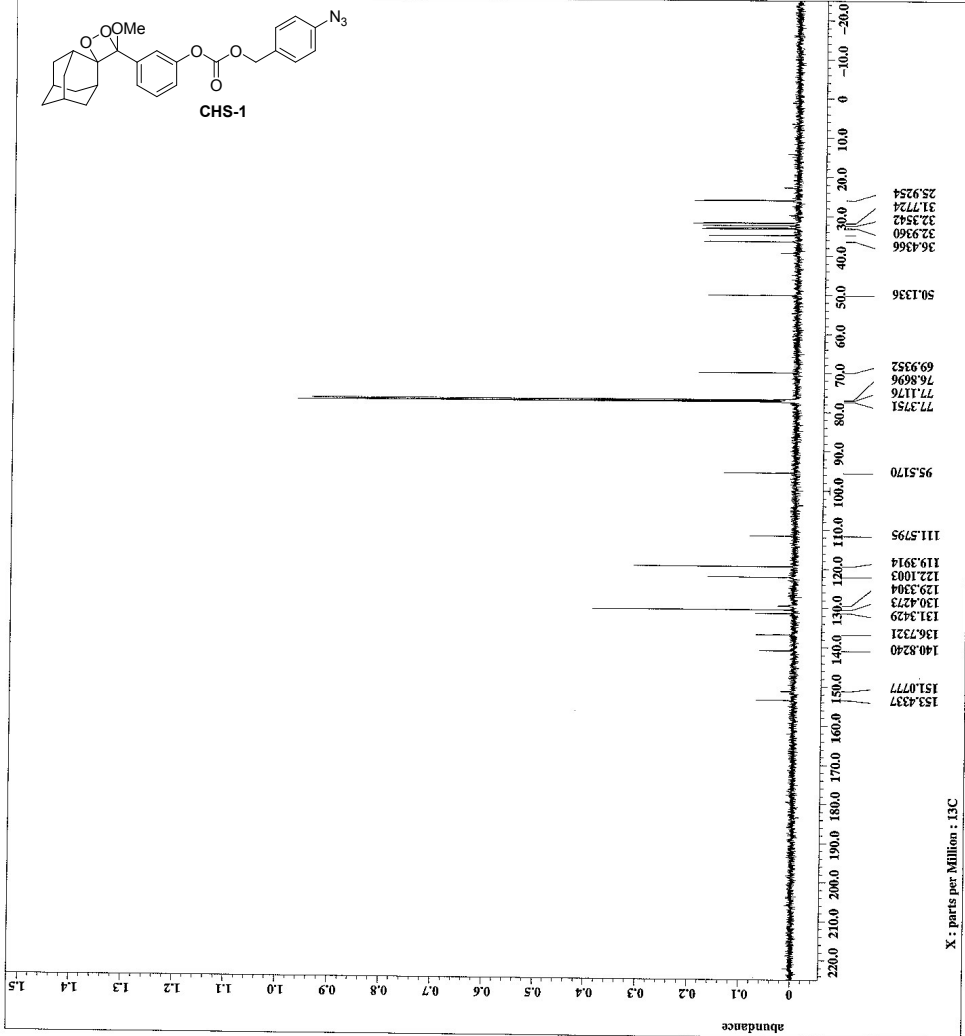

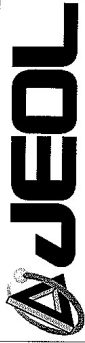

```

= CJ-CHS-2_PROTON-14.fid
= Lippert
= single_pulse.est2
= CJ-CHS-2
= 19-AUG-2014 19:52:17
= 8-OCT-2014 19:37:16
= 8-OCT-2014 19:37:28
= 1D COMPLEX
= 13107
= 1H
= ppm
= X
= ECN 500
= DEZFA2_MMR
= 11.7473579 [G] (500 MHz)
= 1.74587904 [s]
= 1H
= 500.15891521 [MHz]
= 16384
= 1
= 0.57277737 [Hz]
= 0.9438438 [MHz]
= 1H
= 500.15891521 [MHz]
= 5.0 [ppm]
= 500.15891521 [MHz]
= 5.0 [ppm]
= FALSE
= 16
= 16
= 15.5 [us]
= 1.74587904 [s]
= 45 [deg]
= 5 [dB]
= 2.0 [us]
= OFF
= OFF
= FALSE
= FALSE
= 4 [s]
= 4 [s]
= 5.74587904 [s]
= 22.8 [DC]
  
```

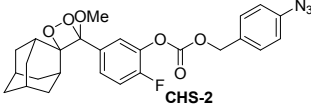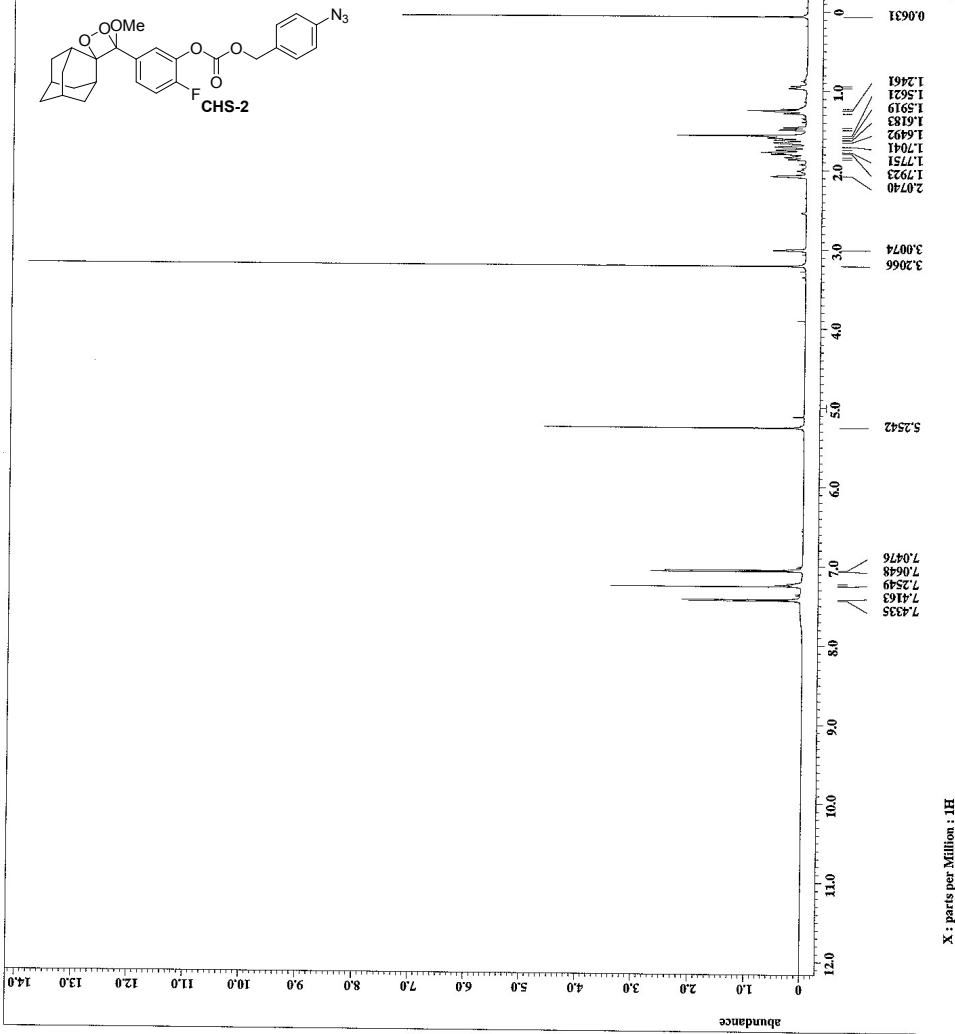

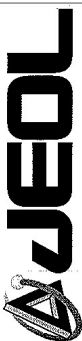

File Name = c:\f\CHS-1\_CAREON-8.J  
Author = Lippert  
Experiment = single\_pulse\_dec  
Pulse Program = zgpg30  
Solvent = CHLOROFORM-D  
Date\_ Acquired = 28-MAY-2014 08:08:49  
Revision Time = 9-OCT-2014 20:34:49  
Current Time = 9-OCT-2014 20:35:09  
Data Format = 1D COMPLEX  
Date\_ Acquired = 26214  
Pulse Program = zgpg30  
Solvent = CHLOROFORM-D  
Dimensions = X  
Site = ECA 500  
Spectrometer = DEPTAJ\_MKR  
Field Strength = 11.747379(T) (500 MHz)  
X\_acq\_duration = 0.89361792(s)  
X\_domain = 135.76529768(MHz)  
X\_offset = 100(ppm)  
X\_points = 32768  
X\_prescans = 4  
X\_resolution = 4.985034(Hz)  
X\_sweep = 39.3081761(MHz)  
Irr\_domain = 1H  
Irr\_freq = 500.13991521(MHz)  
Irr\_pulse = WALTZ16  
Clipset = FALGSI  
Mod\_Return = 1  
Scans = 18298  
Total\_Scans = 18298  
X\_90\_width = 14.28(µs)  
X\_acq\_time = 0.89361792(s)  
X\_delay = 0.000000(s)  
X\_ssb = 0(OFF)  
X\_tilt = 0.000000(deg)  
X\_pulse = 4.76(µs)  
Irr\_atn\_dec = 23(dB)  
Irr\_atn\_pos = 33(dB)  
Irr\_atn = 0.000000(dB)  
Decoupling = WALTZ16  
Initial\_wait = 1(s)  
Noe\_time = 2(s)  
Recvr\_gain = 58  
Relaxation\_delay = 2(s)  
Repetition\_time = 2.89361792(s)  
Temp\_set = 20.7(°C)

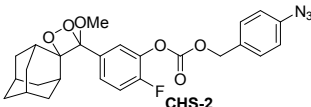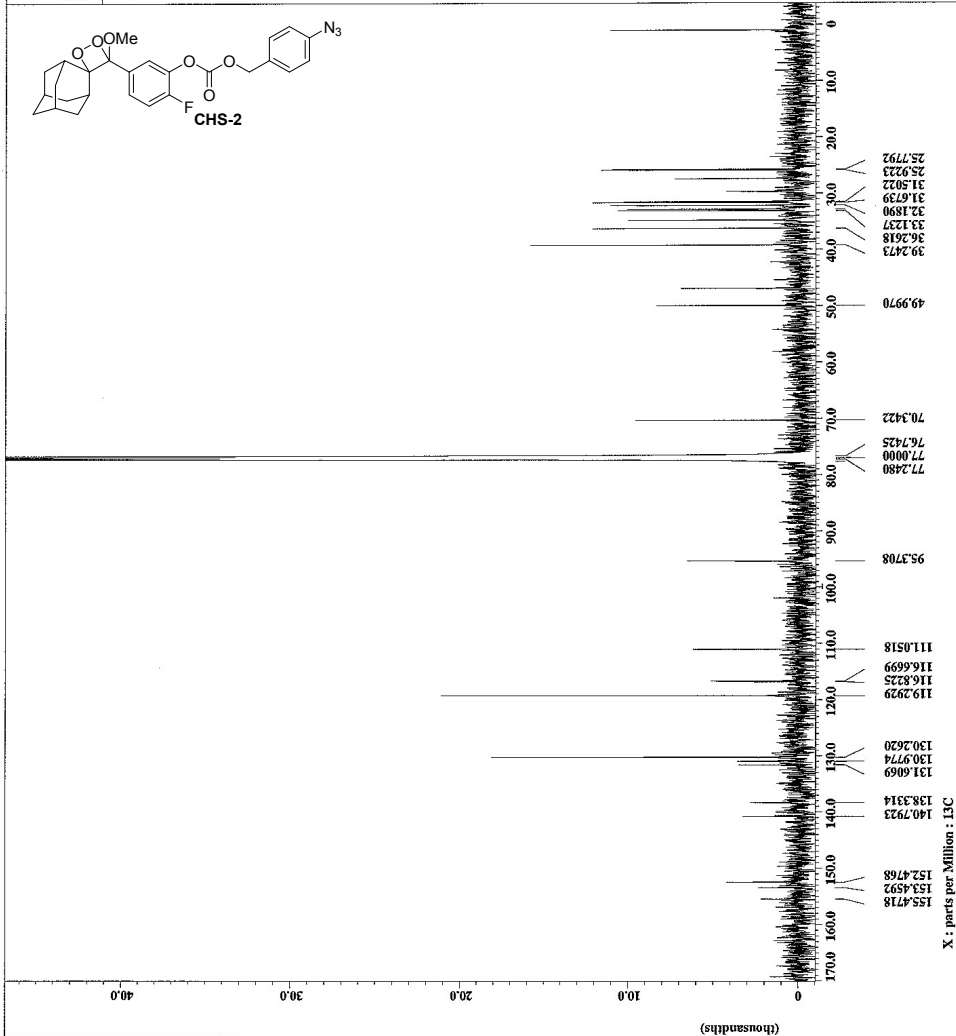

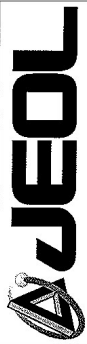

Filename = CJ-CHS-3\_PROTON-25-J4  
Author = Lippert  
Experiment = single\_pulse.exe  
Date\_acq = 20140804  
Solvent = CHLOROFORM-D  
Creation\_time = 4-AUG-2014 13:19:50  
Revision\_time = 8-OCT-2014 19:39:16  
Current\_time = 8-OCT-2014 19:39:25  
Data\_format = 1D COMPLEX  
Dir\_size = 13107  
File\_size = 11794  
Dimensions = [ppm]  
Site = ECA 500  
Spectrometer = DELTA2\_MMR  
Field\_strength = 11.747379 [T] (500 MHz)  
X\_acq\_duration = 1.74587904 [s]  
X\_domain = 8  
X\_freq = 500.15891521 [MHz]  
X\_offset = 5.0 [ppm]  
X\_points = 16384  
X\_prescan = 1  
X\_resolution = 1.5727737 [Hz]  
X\_sweep = 9.38438438 [kHz]  
Irr\_domain = 1H  
Irr\_freq = 500.15891521 [MHz]  
Irr\_offset = 1H  
Tri\_domain = 1H  
Tri\_freq = 500.15891521 [MHz]  
Tri\_offset = 5.0 [ppm]  
Mod\_return = 1  
Scans = 16  
Total\_scans = 16  
X\_90\_width = 15.5 [us]  
X\_acq\_time = 1.74587904 [s]  
X\_angle = 45 [deg]  
X\_delay = 1.5 [s]  
X\_pulse = 7.75 [us]  
Irr\_mode = Off  
Irr\_delay = Off  
Irr\_wait = 1.0 [s]  
Relaxation\_delay = 4 [s]  
Relaxation\_time = 2.74587904 [s]  
Temp\_set = 21.5 [C]

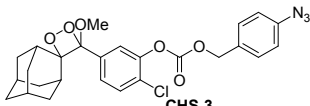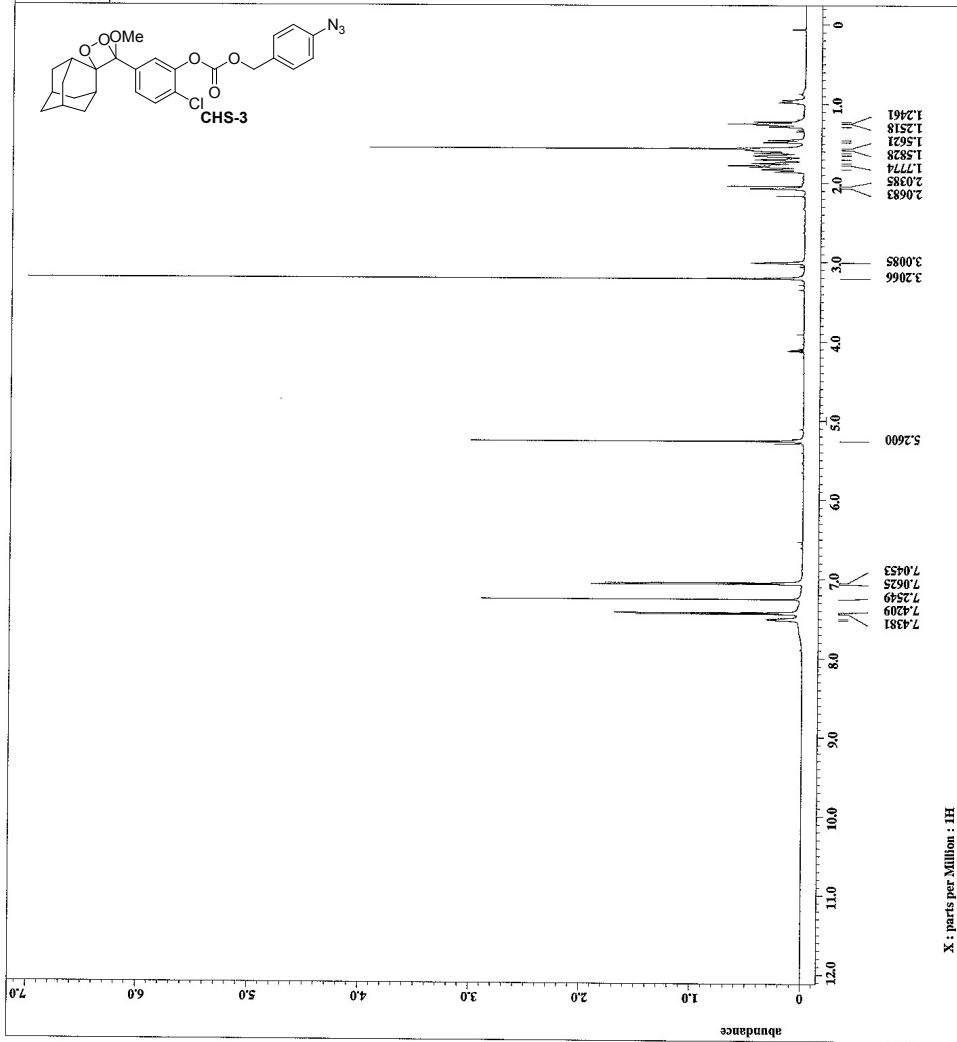

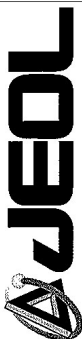

File Name = c:\CHS-3\_CARBON-25.Jd  
Author = Lippert  
Experiment = single\_pulse\_dec  
Pulse Program = zgpg30  
Solvent = CDCl3  
Creation Time = 18-AUG-2014 15:26:47  
Revision Time = 10-OCT-2014 17:59:37  
Current Time = 10-OCT-2014 17:59:53  
Data Format = 1D COMPLEX  
Date Acquired = 26214  
Dim Size = 32768  
F2 = 125.762 MHz  
Dimensions = X  
Site = ECA 500  
Spectrometer = DELTA2\_NMR  
Field Strength = 11.747379 [T] (500 MHz)  
X\_acq\_duration = 0.83361792 [s]  
X\_domain = 13C  
X\_offset = 76529768 [Hz]  
X\_points = 32768  
X\_prescans = 4  
X\_resolution = 4.9858034 [Hz]  
X\_sweep = 39.3081761 [kHz]  
Irr\_domain = 1H  
Irr\_freq = 500.13991321 [MHz]  
Irr\_phase = 0  
Mod\_return = FALSUM  
Seans = 1  
Total\_scans = 553  
X\_90\_width = 14.28 [us]  
X\_acq\_time = 0.83361792 [s]  
X\_delay = 0.08 [s]  
X\_pulse = 4.76 [us]  
Irr\_atn\_dec = 23 [dB]  
Irr\_atn\_rec = 23 [dB]  
Decoupling = WALTZ  
Initial\_wait = 1 [s]  
Noe\_time = 3000  
Recvr\_gain = 60  
Relaxation\_delay = 2 [s]  
Repetition\_time = 2.83361792 [s]  
Temp\_set = 27.3 [C]

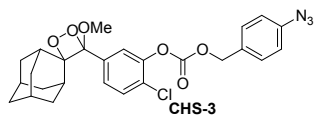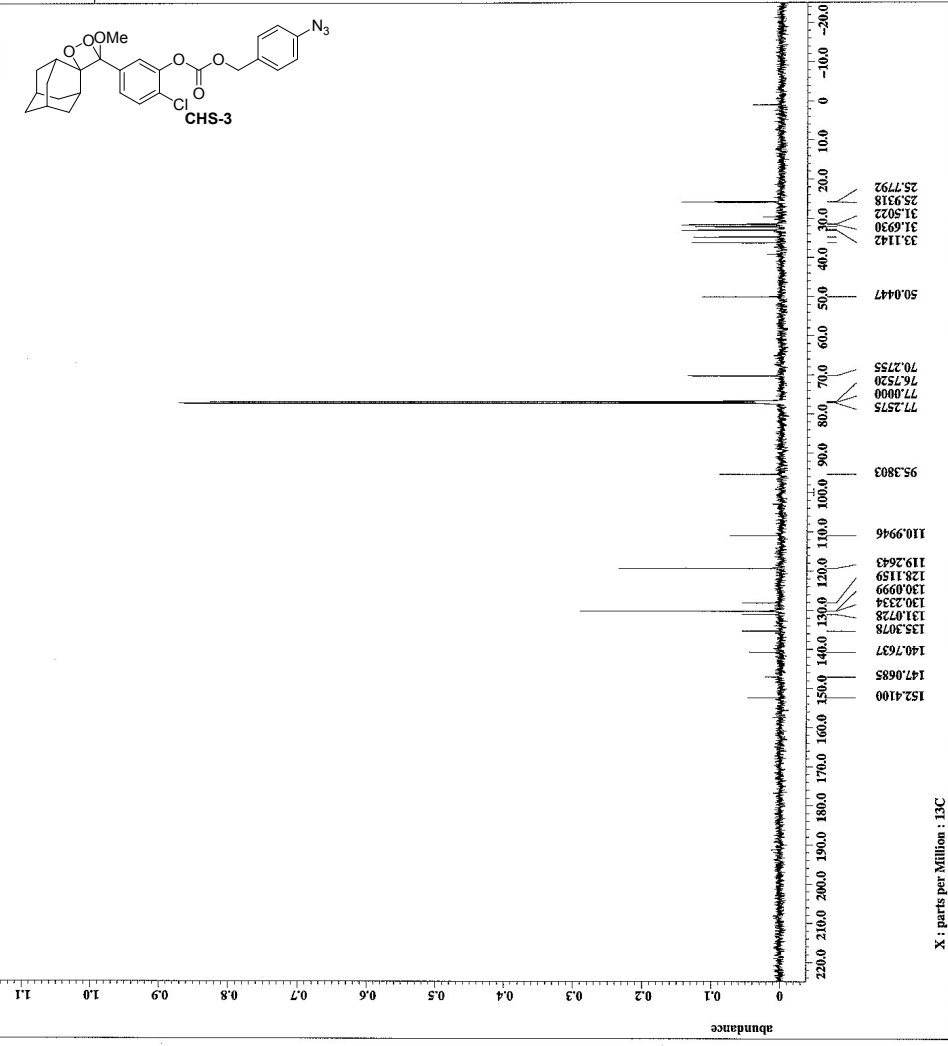

X : parts per Million : 13C

## 8. Refereneces

---

- (1) Only 0 and 200  $\mu\text{M}$   $\text{Na}_2\text{S}$  were evaluated at pH 10.02.
- (2) A. D. Becke, *J. Chem. Phys.* 1993, **98**, 5648.
- (3) C. Lee, W. Yang and R. G. Parr, *Phys. Rev. B* 1988, **37**, 785.
- (4) S. H. Vosko, L. Wilk and M. Nusair, *Can. J. Phys.* 1980, **58**, 1200.
- (5) P. J. Stephens, F. J. Devlin, C. F. Chabalowski and M. J. Frisch, *J. Phys. Chem.* 1994, **98**, 11623.
- (6) R. Krishnan, J. S. Binkley, R. Seeger, J. Pople, J. A. *J. Chem. Phys.* 1980, **72**, 650.
- (7) E. Cancès, B. Mennucci, and J. Tomasi, *J. Chem. Phys.* 1997, **107**, 3032.
- (8) U. C. Singh and P. A. Kollman, *J. Comp. Chem.* 1984, **5**, 129.
- (9) Y. Zhao and D. G. Truhlar, *Theor. Chem. Acc.* 2008, **120**, 215.
- (10) J. D. Chai and M. Head-Gordon, *Phys. Chem. Chem. Phys.* 2008, **10**, 6615.
- (11) Gaussian 09, Revision D.01, M. J. Frisch, G. W. Trucks, H. B. Schlegel, G. E. Scuseria, M. A. Robb, J. R. Cheeseman, G. Scalmani, V. Barone, B. Mennucci, G. A. Petersson, H. Nakatsuji, M. Caricato, X. Li, H. P. Hratchian, A. F. Izmaylov, J. Bloino, G. Zheng, J. L. Sonnenberg, M. Hada, M. Ehara, K. Toyota, R. Fukuda, J. Hasegawa, M. Ishida, T. Nakajima, Y. Honda, O. Kitao, H. Nakai, T. Vreven, J. A. Montgomery, Jr., J. E. Peralta, F. Ogliaro, M. Bearpark, J. J. Heyd, E. Brothers, K. N. Kudin, V. N. Staroverov, R. Kobayashi, J. Normand, K. Raghavachari, A. Rendell, J. C. Burant, S. S. Iyengar, J. Tomasi, M. Cossi, N. Rega, J. M. Millam, M. Klene, J. E. Knox, J. B. Cross, V. Bakken, C. Adamo, J. Jaramillo, R. Gomperts, R. E. Stratmann, O. Yazyev, A. J. Austin, R. Cammi, C. Pomelli, J. W. Ochterski, R. L. Martin, K. Morokuma, V. G. Zakrzewski, G. A. Voth, P. Salvador, J. J. Dannenberg, S. Dapprich, A. D. Daniels, Ö. Farkas, J. B. Foresman, J. V. Ortiz, J. Cioslowski, and D. J. Fox, Gaussian, Inc., Wallingford CT, 2009.
